# Supplementary material for: Dnmt3a is an epigenetic mediator of adipose insulin resistance
Source: eLife. 2017 Nov 1;6:e30766. doi: 10.7554/eLife.30766 (PMC5730374; doi:10.7554/eLife.30766)
Supplement: Figure 1—figure supplement 1—source data 1. [file elife-30766-fig1-figsupp1-data1.xlsx]

## Sheet: A
			cyclophilin	Dnmt3a		4.07744		AVG	STD	SEM	p-value					AVG	STD	SEM	p-value
iWAT	chow	1	20.8408	24.1216	3.28078	1.73708	1.67042	1.07541	0.420653	0.171731	0.0409098			iWAT	chow	1.07541	0.420653	0.171731	0.0409098
			20.8775	24.2734	3.39597	1.60377									HFD	1.54842	0.258729	0.105626
		2	20.9962	25.2398	4.24356	0.891236	0.886859							BAT	chow	1.14251	0.400183	0.163374	0.162759
			21.093	25.3508	4.2578	0.882481									HFD	1.62498	0.576454	0.235336
		3	20.7045	25.0585	4.354	0.825557	0.880269							Mes	chow	1.14065	1.08911	0.444628	0.0141227
			20.7395	24.9139	4.17443	0.934981									HFD	4.607	2.58743	1.05631
		4	21.5407	26.488	4.94722	0.547229	0.49692
			21.3705	26.6109	5.24035	0.446611
		5	20.5023	24.4045	3.90227	1.1291	1.09313
			20.4231	24.4204	3.99724	1.05716
		6	21.2042	24.8307	3.62654	1.36689	1.42485
			21.3226	24.8317	3.50912	1.4828		AVG	STD	SEM
	HFD	1	20.4662	24.2602	3.79392	1.21716	1.32218	1.54842	0.258729	0.105626
			20.4696	24.0338	3.56425	1.4272
		2	20.0248	23.4308	3.40596	1.5927	1.80297
			20.4742	23.5422	3.06792	2.01324
		3	20.5367	24.0136	3.47688	1.5163	1.40913
			20.5976	24.2944	3.69677	1.30195
		4	20.5979	24.1543	3.55634	1.43505	1.25036
			20.5089	24.4946	3.98568	1.06567
		5	19.6303	22.7278	3.09757	1.97228	1.86874
			20.5143	23.7719	3.25761	1.7652
		6	20.4691	23.7573	3.28827	1.72808	1.63715
			20.5085	23.9572	3.4487	1.54621
			cyclophilin	Dnmt3a		5.27841		AVG	STD	SEM	p-value
BAT	chow	1	20.8625	26.7469	5.88436	0.657039	0.722141	1.14251	0.400183	0.163374	0.162759
			21.0749	26.6984	5.62353	0.787242
		2	20.6725	25.9046	5.23213	1.0326	0.975759
			20.8151	26.2155	5.4004	0.918919
		3	22.1838	28.3953	6.21154	0.523722	0.532538
			22.2141	28.3778	6.16377	0.541355
		4	20.8632	25.6123	4.74905	1.44329	1.26267
			20.7927	25.9574	5.16465	1.08205
		5	20.6973	25.4651	4.76778	1.42468	1.54406
			20.9361	25.4803	4.54423	1.66345
		6	20.854	25.5435	4.68946	1.50415	1.39752
			20.6105	25.5206	4.91005	1.29089		AVG	STD	SEM
	HFD	1	20.6783	25.5851	4.90675	1.29384	1.33549	1.62498	0.576454	0.235336
			20.877	25.6937	4.81674	1.37714
		2	20.6211	25.2609	4.63981	1.55682	1.4899
			20.6531	25.4226	4.7695	1.42298
		3	20.492	26.1952	5.70319	0.744953	0.960233
			21.42	26.4651	5.04512	1.17551
		4	20.8184	25.4465	4.62806	1.56955	1.31306
			20.6203	25.8193	5.19902	1.05658
		5	20.6497	25.1391	4.48942	1.72787	2.45814
			20.7738	24.3793	3.60558	3.18841
		6	20.2673	24.0311	3.76387	2.85708	1.90358
			20.435	25.7873	5.35229	0.950079
			cyclophilin	Dnmt3a		3.73152		AVG	STD	SEM	p-value
Mesenteric	chow	1	24.1084	28.9174	4.80904	0.473844	0.531994	1.14065	1.08911	0.444628	0.0141227
			24.1902	28.6826	4.49238	0.590144
		2	24.5836	27.6772	3.09361	1.55608	1.74471
			24.5718	27.3522	2.78042	1.93335
		3	24.3799	28.4774	4.09745	0.775969	0.774266
			24.1771	28.2809	4.1038	0.772564
		4	24.7327	27.3055	2.57282	2.23257	1.58656
			24.8554	28.6754	3.81994	0.940552
		5	23.9731	27.1165	3.14347	1.50322	1.06569
			24.0797	28.482	4.4023	0.628168
	HFD	1	23.5215	25.9151	2.39359	2.52789	3.79357	4.607	2.58743	1.05631
			23.6515	25.044	1.3926	5.05926
		2	24.4036	26.7601	2.35658	2.59358	2.40951
			24.1309	26.7083	2.57743	2.22544
		3	23.5344	25.9473	2.41288	2.4943	2.99301
			23.1177	25.0453	1.92758	3.49172
		4	24.9808	25.0847	0.10387	12.3604	7.94926
			24.2208	26.1294	1.90853	3.53814
		5	24.8442	26.0176	1.17334	5.88964	5.88964

## Sheet: B
																AVG Fold	STD	SEM	p-value
													Liver	Dnmt1	chow	1.09173	0.44276	0.180756
															HFD	1.5447	0.211125	0.0944178	0.0968181
			cyclophilin	Dnmt1		7.93161	Fold Exp	AVG Fold	STD	SEM	p-value			Dnmt3a	chow	1.08495	0.38796	0.158384
	chow	1	18.7725	27.0084	8.23595	0.809813	0.780817	1.09173	0.44276	0.180756					HFD	1.20558	0.162163	0.0725217	0.534834
			18.847	27.1902	8.34315	0.751821								Dnmt3b	chow	1.25905	0.495557	0.188532
		2	19.4951	27.0836	7.58848	1.26851	1.28439								HFD	1.3613	0.727808	0.34484	0.78811
			19.519	27.0718	7.55279	1.30028
		3	18.6617	27.3799	8.71825	0.579694	0.684633
			18.9046	27.1771	8.27246	0.789573
		4	19.8426	27.7327	7.89011	1.02918	0.764155
			18.9213	27.8554	8.93414	0.499125
		5	19.1193	26.7731	7.65378	1.21237	1.84194
			19.4535	26.0797	6.62621	2.47151
		6	19.1002	26.9215	7.82128	1.07948	1.19443
			19.1087	26.6515	7.54272	1.30938
	HFD	1	19.4054	27.4036	7.99813	0.954937	1.60412	1.5447	0.211125	0.0944178	0.0968181
			19.3713	26.1309	6.75956	2.25331
		2	19.2346	36.5344	17.2998
			19.8838	36.1177	16.234
		3	17.9235	25.9808	8.05735	0.916533	1.29822
			18.0376	25.2208	7.18322	1.67991
		4	19.2982	26.8442	7.54602	1.30639	1.79938
			19.3093	26.044	6.73477	2.29237
		5	19.3596	26.7601	7.4005	1.44504	1.47705
			19.3704	26.7083	7.33795	1.50907
			cyclophilin	Dnmt3a		8.4529
	chow	1	18.7725	27.5678	8.79533	0.788712	0.685152	1.08495	0.38796	0.158384
			18.847	28.0818	9.23482	0.581592
		2	19.4951	28.2838	8.78874	0.792325	0.693498
			19.519	28.7218	9.20274	0.594672
		3	18.6617	27.2774	8.61571	0.893283	0.875291
			18.9046	27.5796	8.67503	0.8573
		4	19.8426	27.3228	7.48025	1.96244	1.33185
			18.9213	27.8862	8.96487	0.701268
		5	19.1193	26.7357	7.61641	1.7857	1.62058
			19.4535	27.3649	7.91143	1.45546
		6	19.1002	27.2826	8.18237	1.20625	1.3033
			19.1087	27.0759	7.96712	1.40034
	HFD	1	19.4054	27.7328	8.32737	1.09091	1.03345	1.20558	0.162163	0.0725217	0.534834
			19.3713	27.8593	8.48796	0.975993
		2	19.2346	26.9941	7.75955	1.61703	1.47462
			19.8838	27.9229	8.03908	1.33221
		3	17.9235	26.0026	8.0791	1.29576	1.17144
			18.0376	26.4241	8.38648	1.04712
		4	19.2982	27.3309	8.03275	1.33807	1.16966
			19.3093	27.7604	8.45111	1.00124
		5	19.3596	27.8408	8.48119	0.980584	1.17871
			19.3704	27.3619	7.99154	1.37684
			cyclophilin	Dnmt3		12.1316
	chow	1	18.7725	32.1049	13.3324	0.435013	0.456301	1.20567	0.461808	0.188532
			18.847	32.0448	13.1977	0.47759
		2	19.4951	30.2895	10.7944	2.52653	1.61779
			19.519	32.1466	12.6276	0.709053
		3	18.6617	31.1996	12.5379	0.754535	1.40173
			18.9046	30.0013	11.0967	2.04893
		4	19.8426	33.0786	13.236	0.465076	1.23072
			18.9213	30.0555	11.1342	1.99637
		5	19.1193	31.0188	11.8995	1.1745	0.883536
			19.4535	32.34	12.8865	0.592569
		6	19.1002	30.4176	11.3174	1.75832	1.64396
			19.1087	30.6272	11.5184	1.5296
	HFD	1	19.4054	30.9681	11.5627	1.48339	1.4733	1.44224	0.771086	0.34484	0.543418
			19.3713	30.9538	11.5824	1.46322
		2	19.2346	30.4613	11.2267	1.87237	2.69949
			19.8838	30.1971	10.3133	3.52662
		3	17.9235	30.5176	12.5941	0.725706	0.62979
			18.0376	31.0746	13.037	0.533873
		4	19.2982	31.2913	11.9931	1.10076	1.31236
			19.3093	30.833	11.5237	1.52397
		5	19.3596	31.0097	11.65	1.39622	1.09627
			19.3704	31.8305	12.4602	0.796314

## Sheet: C
																AVG Fold	STD	SEM	p-value
		cyclophilin	Dnmt1		3.41979	Fold Exp	AVG Fold	STD	SEM	p-value			Muscle	Dnmt1	chow	1.02911	0.184851	0.075465
chow	1	22.7324	26.215	3.48257	0.957415	0.763702	1.02911	0.184851	0.075465						HFD	1.07707	0.141887	0.0579252	0.625112
		22.271	26.5017	4.23078	0.569989									Dnmt3a	chow	1.15122	0.451586	0.184359
	2	23.326	26.3425	3.01652	1.3225	1.33137									HFD	2.29275	0.386566	0.157815	0.000836667
		23.9786	26.9759	2.99729	1.34024									Dnmt3b	chow	1.09062	0.0982983	0.0401301
	3	22.2364	25.6603	3.42385	0.997185	1.07757									HFD	1.26999	0.265786	0.108507	0.15208
		22.4163	25.6245	3.20822	1.15795
	4	23.0463	26.3516	3.30521	1.08265	0.953198
		22.7401	26.4397	3.69952	0.823742
	5	22.3988	26.3138	3.91504	0.709436	1.00331
		22.8147	25.8592	3.04441	1.29718
	6	22.6071	26.029	3.42194	0.99851	1.04553
		22.4841	25.7762	3.29208	1.09256
HFD	1	22.2632	25.9629	3.69974	0.82362	0.985801	1.07707	0.141887	0.0579252	0.625112
		22.6209	25.8416	3.22068	1.14798
	2	22.3875	25.181	2.7935	1.54359	1.14199
		22.6352	26.4886	3.85341	0.740399
	3	22.879	25.8436	2.96457	1.37099	1.2209
		22.6404	25.9615	3.32109	1.0708
	4	22.8228	25.8891	3.06629	1.27765	1.21286
		22.6801	25.9007	3.22058	1.14807
	5	22.112	25.6448	3.53278	0.924668	0.858465
		22.1315	25.8873	3.75574	0.792262
	6	23.3944	26.783	3.38866	1.02181	1.0424
		22.9717	26.3034	3.33165	1.06299
		cyclophilin	Dnmt3a		1.73815
chow	1	22.7324	25.2903	2.55791	0.566537	0.439922	1.15122	0.451586	0.184359
		22.271	25.6835	3.4125	0.313308
	2	23.326	25.3606	2.03462	0.814241	1.28953
		23.9786	24.8973	0.918636	1.76481
	3	22.2364	24.5941	2.3577	0.650874	0.754741
		22.4163	24.3744	1.95808	0.858608
	4	23.0463	23.9784	0.932026	1.74851	1.36295
		22.7401	24.5113	1.77115	0.977388
	5	22.3988	24.0806	1.68177	1.03985	1.58236
		22.8147	23.4655	0.650779	2.12487
	6	22.6071	23.3104	0.70333	2.04886	1.47782
		22.4841	24.3634	1.87931	0.906788
HFD	1	22.2632	22.9371	0.673959	2.091	2.39053	2.29275	0.386566	0.157815	0.000836667
		22.6209	22.9314	0.310517	2.69005
	2	22.3875	22.9067	0.519234	2.32772	1.96078
		22.6352	23.7008	1.06565	1.59383
	3	22.879	22.5727	-0.306261	4.12505	2.808
		22.6404	23.8023	1.16192	1.49095
	4	22.8228	23.2523	0.429461	2.47717	1.90852
		22.6801	23.9962	1.31606	1.33987
	5	22.112	22.5269	0.414824	2.50243	2.66759
		22.1315	22.3675	0.235951	2.83275
	6	23.3944	23.8284	0.434055	2.46929	2.02112
		22.9717	24.0564	1.08468	1.57295
		cyclophilin	Dnmt3b		10.5612
chow	1	22.7324	32.9069	10.1745	1.30736	1.02822	1.09062	0.0982983	0.0401301
		22.271	33.2489	10.978	0.749085
	2	23.326	34.8096	11.4836	0.527618	1.1284
		23.9786	33.7497	9.77108	1.72919
	3	22.2364	33.3752	11.1387	0.670104	1.1828
		22.4163	32.2157	9.79946	1.6955
	4	23.0463	33.6032	10.5569	1.00297	1.04446
		22.7401	33.1823	10.4422	1.08596
	5	22.3988	33.5059	11.1071	0.684935	1.20669
		22.8147	32.5864	9.7717	1.72843
	6	22.6071	33.9718	11.3647	0.572935	0.953169
		22.4841	32.6302	10.1461	1.3334
HFD	1	22.2632	32.6551	10.392	1.12444	1.05328	1.26999	0.265786	0.108507	0.15208
		22.6209	33.2081	10.5872	0.982116
	2	22.3875	32.5934	10.206	1.27917	1.29238
		22.6352	32.8117	10.1765	1.30559
	3	22.879	32.6206	9.74166	1.76481	1.74685
		22.6404	32.4117	9.77133	1.72889
	4	22.8228	33.33	10.5072	1.03815	1.24505
		22.6801	32.7033	10.0232	1.45196
	5	22.112	32.6418	10.5297	1.02203	0.991937
		22.1315	32.7488	10.6173	0.961841
	6	23.3944	33.131	9.73667	1.77092	1.29047
		22.9717	33.8369	10.8651	0.810022

## Sheet: E
			eWAT			Liver			Mus
			#1	#2	#3	#1	#2	#3	#1	#2	#3
		Dnmt3a	19.276	13.682	20.261	2.986	3.363	0.406	2.624	1.102	1.622
		b-actin	117.768	112.077	114.257	86.658	84.89	85.73	94.658	98.137	96.207
		Dnmt3a/b-actin	0.163678	0.122077	0.177328	0.0344573	0.039616	0.0047358	0.0277208	0.0112292	0.0168595
		AVG	0.154361			0.0262697			0.0186032
		STD	0.0287799			0.0188264			0.00838296
		SEM	0.0166161			0.0108694			0.0048399
		p-value	0.00142658			0.00297195

## Sheet: G
			eWAT			iWAT			BAT			mesWAT
			#1	#2	#3	#1	#2	#3	#1	#2	#3	#1	#2	#3
		Dnmt3a	10.721	11.363	13.537	16.973	16.916	20.907	3.646	4.905	5.495	28.581	36.847	27.729
		b-actin	79.876	102.923	101.012	108.05	106.247	105.727	80.093	93.317	91.807	90.433	100.479	103.108
		Dnmt3a/b-actin	0.134221	0.110403	0.134014	0.157085	0.159214	0.197745	0.0455221	0.0525628	0.0598538	0.316046	0.366713	0.268932
		AVG	0.126212			0.171348			0.0526462			0.31723
		STD	0.0136918			0.0228854			0.00716624			0.0489017
		SEM	0.00790497			0.0132129			0.00413743			0.0282334
		p-value	0.0427526			0.0427526			0.00118007			0.00286519
