# Supplementary material for: Dnmt3a is an epigenetic mediator of adipose insulin resistance
Source: eLife. 2017 Nov 1;6:e30766. doi: 10.7554/eLife.30766 (PMC5730374; doi:10.7554/eLife.30766)
Supplement: Figure 1—source data 1. [file elife-30766-fig1-data1.xlsx]

## Sheet: Fig1A
		cyclophilin	Dnmt1		4.5338		AVG	STD	SEM	p-value
Chow	1	23.2158	27.4747	4.25887	1.20994	1.11117	1.05358	0.367567	0.150059
		23.334	27.85	4.51604	1.01239
	2	22.8731	26.5704	3.69727	1.78575	1.66626
		23.0256	26.9301	3.90454	1.54677
	3	22.8373	26.9988	4.16149	1.29443	1.21916
		22.835	27.1748	4.33985	1.1439
	4	22.7544	27.4948	4.74043	0.866563	0.926091
		22.7651	27.3198	4.5547	0.985618
	5	22.8994	28.0685	5.16915	0.643787	0.733069
		22.8683	27.6843	4.81598	0.82235
	6	22.7466	27.9612	5.21453	0.62385	0.665723
		22.7494	27.7822	5.0328	0.707597
HFD	1	22.5269	25.9685	3.44161	2.13198	2.35106	2.27984	0.455463	0.185942	0.000442827
		22.5024	25.6743	3.17196	2.57014
	2	22.6786	25.7483	3.0697	2.75891	2.84694
		22.6098	25.5903	2.98046	2.93496
	3	22.5037	26.0277	3.52399	2.01365	2.06511
		22.4859	25.938	3.45207	2.11657
	4	22.4761	25.9979	3.5218	2.01671	1.84415
		22.2825	26.0751	3.79258	1.67159
	5	22.1827	25.2172	3.03452	2.82703	2.773
		22.1488	25.2395	3.09075	2.71896
	6	22.0833	25.6929	3.60957	1.89768	1.79877
		21.9671	25.7355	3.76839	1.69985
		cyclophilin	Dnmt3a		3.4666
Chow	1	23.2158	26.3896	3.1738	1.22501	1.24835	1.04662	0.337526	0.137795
		23.334	26.4538	3.11985	1.27169
	2	22.8731	25.7281	2.85494	1.52802	1.56551
		23.0256	25.8114	2.78581	1.60301
	3	22.8373	26.0443	3.20701	1.19714	1.13421
		22.835	26.2022	3.36725	1.07129
	4	22.7544	26.3885	3.63416	0.890345	0.904918
		22.7651	26.3528	3.58769	0.919491
	5	22.8994	26.855	3.95561	0.712515	0.643326
		22.8683	27.1354	4.26713	0.574137
	6	22.7466	26.68	3.93336	0.723588	0.783418
		22.7494	26.462	3.71257	0.843248
HFD	1	22.5269	24.8155	2.28862	2.26259	2.15821	2.49844	0.676386	0.276134	0.000835921
		22.5024	24.9307	2.42829	2.05382
	2	22.6786	24.4482	1.7696	3.24225	3.14465
		22.6098	24.469	1.85918	3.04706
	3	22.5037	24.4207	1.91693	2.92749	3.13951
		22.4859	24.2077	1.72178	3.35153
	4	22.4761	24.9685	2.49237	1.96459	1.92551
		22.2825	24.8334	2.55094	1.88643
	5	22.1827	24.0623	1.87962	3.00419	2.99873
		22.1488	24.0337	1.88488	2.99327
	6	22.0833	24.7723	2.68899	1.71429	1.62401
		21.9671	24.8167	2.84955	1.53374
		cyclophilin	Dnmt3b		8.80001
Chow	1	23.2158	31.2322	8.01639	1.72143	1.57126	1.05042	0.327848	0.133844
		23.334	31.627	8.29299	1.4211
	2	22.8731	31.5461	8.67301	1.09201	1.28383
		23.0256	31.2642	8.23865	1.47565
	3	22.8373	31.5951	8.75785	1.02965	1.0868
		22.835	31.441	8.60597	1.14395
	4	22.7544	31.6137	8.85931	0.95972	0.754369
		22.7651	32.4302	9.66508	0.549018
	5	22.8994	32.191	9.29168	0.711194	0.816783
		22.8683	31.7849	8.91658	0.922372
	6	22.7466	31.9113	9.16466	0.776653	0.789446
		22.7494	31.8673	9.1179	0.80224
HFD	1	22.5269	30.7625	8.23558	1.4788	1.28692	0.909971	0.280914	0.114683	0.444061
		22.5024	31.1714	8.66902	1.09504
	2	22.6786	31.4335	8.75493	1.03173	1.12878
		22.6098	31.1161	8.50624	1.22583
	3	22.5037	31.4337	8.92995	0.913861	0.982924
		22.4859	31.2128	8.72688	1.05199
	4	22.4761	32.3926	9.91645	0.461227	0.625291
		22.2825	31.4237	9.14125	0.789356
	5	22.1827	31.0761	8.89346	0.937273	0.867107
		22.1488	31.2762	9.12746	0.796941
	6	22.0833	31.5211	9.4378	0.642691	0.568806
		21.9671	31.7819	9.81473	0.49492

## Sheet: Fig1B
			cyclophilin	Dnmt1		1.98672		AVG	STD	SEM	p-value	p-value
	ob/+	1	22.2183	24.3989	2.18059	0.874256	0.791062	1.0403	0.225255	0.0851385
			22.1832	24.6684	2.48517	0.707869
		2	21.4493	23.3701	1.92081	1.04674	1.18863
			21.4067	22.9814	1.57473	1.33052
		3	21.9916	23.8251	1.83356	1.11201	1.1535
			21.9891	23.7188	1.7297	1.195
		4	22.2318	24.6123	2.38053	0.761117	0.851088
			22.3318	24.4062	2.07437	0.941058
		5	21.8284	24.1838	2.3554	0.774491	0.793694
			21.8068	24.0924	2.28558	0.812897
		6	21.9359	22.9502	1.01426	1.96218	1.35503
			21.9653	24.3712	2.40584	0.747879
		7	21.4146	23.2409	1.82635	1.11757	1.14908
			21.592	23.3392	1.74722	1.18058
	ob/ob	1	21.5726	22.3438	0.771174	2.32229	2.35531	2.38061	0.217399	0.0821691	2.78633e-08
			21.5551	22.2858	0.730711	2.38834
		2	21.7131	22.8492	1.13611	1.80326	2.08883
			21.7721	22.5113	0.739155	2.3744
		3	21.2375	21.9122	0.674641	2.48299	2.50618
			21.268	21.9159	0.647947	2.52936
		4	21.2979	21.8677	0.569797	2.67015	2.58645
			21.3566	22.0198	0.663203	2.50275
		5	21.3979	21.8984	0.500506	2.80153	2.70193
			21.3918	21.9987	0.60692	2.60232
		6	21.8041	22.3146	0.51051	2.78217	2.24178
			21.7687	22.9887	1.22	1.70139
		7	21.5694	22.4346	0.865193	2.17577	2.13214
			21.7515	22.6758	0.924245	2.08851
		8	21.6215	22.2007	0.57926	2.6527	2.43228
			21.5499	22.3913	0.841462	2.21186
	ob/+, Rosi	1	21.9685	24.4923	2.52387	0.689131	0.662733	0.766672	0.305496	0.115467	0.692666	2.28051e-08
			21.9857	24.6245	2.63886	0.636335
		2	21.9973	23.9638	1.96647	1.01414	1.03408
			22.1325	24.0433	1.91082	1.05402
		3	22.2231	23.9936	1.77048	1.1617	1.02715
			22.1092	24.2598	2.15064	0.892598
		4	22.3974	25.4147	3.01725	0.489531	0.448916
			22.8471	26.1261	3.27901	0.408301
		5	22.8446	24.8238	1.97917	1.00525	1.01569
			22.9722	24.9217	1.9495	1.02614
		6	23.3608	27.1291	3.76836	0.290853	0.285966
			23.3617	27.1794	3.81767	0.281079
		7	21.8625	23.919	2.05648	0.952794	0.892168
			21.8883	24.1411	2.25286	0.831543
	ob/ob +Rosi	1	21.9952	22.8002	0.805079	2.26835	2.19885	1.38045	0.914628	0.345697	0.358224	0.00999786
			21.9817	22.878	0.896298	2.12936
		2	21.3289	23.0079	1.67898	1.23777	1.38426
			21.5356	22.9081	1.37248	1.53075
		3	21.7029	26.1941	4.49126	0.176221	0.235852
			22.2947	26.0402	3.74557	0.295483
		4	21.7431	26.3562	4.61305	0.161956	0.189285
			21.7699	25.9634	4.19353	0.216613
		5	22.1559	22.692	0.53615	2.73316	2.60448
			21.9242	22.6031	0.678825	2.4758
		6	21.6095	23.386	1.77653	1.15684	1.32479
			21.6816	23.0903	1.40875	1.49275
		7	22.3754	23.7081	1.33274	1.57351	1.72561
			22.4366	23.5144	1.07774	1.87771
			cyclophilin	Dnmt3a		4.89188		AVG	STD	SEM	p-value	p-value
	ob/+	1	22.2183	27.3425	5.12422	0.851251	0.837797	1.03329	0.26458	0.100002
			22.1832	27.3538	5.17056	0.824344
		2	21.4493	26.1249	4.67557	1.16175	1.12105
			21.4067	26.187	4.78038	1.08035
		3	21.9916	26.6553	4.6637	1.17136	1.2871
			21.9891	26.3926	4.40353	1.40284
		4	22.2318	27.5963	5.36454	0.720632	0.809977
			22.3318	27.3768	5.04497	0.899322
		5	21.8284	27.3708	5.54237	0.637063	0.651131
			21.8068	27.2869	5.48002	0.665199
		6	21.9359	26.5174	4.58149	1.24004	1.32714
			21.9653	26.3572	4.39185	1.41424
		7	21.4146	25.9841	4.56955	1.25034	1.19886
			21.592	26.2856	4.69355	1.14737
	ob/ob	1	21.5726	23.9311	2.35852	5.78917	5.37193	4.8969	0.858256	0.32439	3.86326e-08
			21.5551	24.1382	2.58308	4.95469
		2	21.7131	24.3661	2.65304	4.72018	4.81361
			21.7721	24.3692	2.59703	4.90704
		3	21.2375	24.2185	2.98101	3.76035	3.91672
			21.268	24.1338	2.86575	4.0731
		4	21.2979	23.7343	2.43642	5.48489	5.8101
			21.3566	23.6313	2.27474	6.13531
		5	21.3979	24.0973	2.69943	4.5708	4.48898
			21.3918	24.1439	2.75203	4.40715
		6	21.8041	24.6773	2.8732	4.05213	4.08467
			21.7687	24.6189	2.85021	4.11722
		7	21.5694	24.3144	2.745	4.42867	4.36941
			21.7515	24.5357	2.78414	4.31015
		8	21.6215	23.8243	2.20286	6.44873	6.31979
			21.5499	23.8116	2.26174	6.19085
	ob/+, Rosi	1	21.9685	27.418	5.44955	0.679399	0.655161	0.895623	0.324414	0.122617	0.508118	3.17759e-08
			21.9857	27.542	5.55634	0.630923
		2	21.9973	26.8866	4.88935	1.00175	1.21127
			22.1325	26.5177	4.38518	1.4208
		3	22.2231	26.9101	4.68702	1.15257	1.05857
			22.1092	27.0531	4.94394	0.964559
		4	22.3974	27.7947	5.39729	0.704459	0.809095
			22.8471	27.8692	5.02204	0.913731
		5	22.8446	27.5579	4.71334	1.13174	1.29246
			22.9722	27.3249	4.35266	1.45319
		6	23.3608	29.8491	6.48836	0.330682	0.364404
			23.3617	29.5823	6.22059	0.398125
		7	21.8625	26.825	4.96255	0.952196	0.878398
			21.8883	27.0938	5.20554	0.8046
	ob/ob +Rosi	1	21.9952	24.3678	2.37267	5.73267	5.35086	2.74555	1.70723	0.645273	0.0222928	0.00767769
			21.9817	24.5606	2.57891	4.96906
		2	21.3289	24.8515	3.52256	2.58349	2.83462
			21.5356	24.8019	3.26626	3.08575
		3	21.7029	26.9802	5.27736	0.765523	0.949058
			22.2947	27.0069	4.71225	1.13259
		4	21.7431	26.7859	5.04277	0.900692	0.905635
			21.7699	26.7969	5.02703	0.910578
		5	22.1559	24.9072	2.75127	4.40947	4.34402
			21.9242	24.719	2.79475	4.27858
		6	21.6095	25.8945	4.28507	1.52289	1.60832
			21.6816	25.8132	4.13166	1.69374
		7	22.3754	25.5715	3.19614	3.23943	3.22634
			22.4366	25.6445	3.20785	3.21324
			cyclophilin	Dnmt3b		10.4249	Dnmt3b	AVG	STD	SEM	p-value	p-value
	ob/+	1	22.2183	32.3809	10.1626	1.18066	1.13305	1.00353	0.150417	0.0568524
			22.1832	32.4671	10.2839	1.08545
		2	21.4493	31.9768	10.5275	0.916843	0.99667
			21.4067	31.7025	10.2959	1.0765
		3	21.9916	32.6247	10.6331	0.852077	0.827077
			21.9891	32.7095	10.7204	0.802078
		4	22.2318	32.5801	10.3483	1.03805	1.14208
			22.3318	32.4166	10.0848	1.24611
		5	21.8284	32.9378	11.1093	0.61253	0.765761
			21.8068	32.3309	10.5241	0.918993
		6	21.9359	31.9212	9.98522	1.33513	1.06669
			21.9653	32.6926	10.7273	0.798256
		7	21.4146	31.6859	10.2714	1.09492	1.09338
			21.592	31.8674	10.2754	1.09184
	ob/ob	1	21.5726	30.7305	9.15788	2.36907	2.42283	1.96987	0.433521	0.163855	8.79937e-05
			21.5551	30.649	9.09384	2.47659
		2	21.7131	30.7934	9.08031	2.49994	2.33984
			21.7721	31.0502	9.27804	2.17974
		3	21.2375	30.6554	9.41792	1.97832	1.97462
			21.268	30.6913	9.42333	1.97091
		4	21.2979	30.5771	9.27924	2.17793	2.0962
			21.3566	30.7484	9.3918	2.01447
		5	21.3979	30.9566	9.55875	1.79434	2.23234
			21.3918	30.377	8.98517	2.67035
		6	21.8041	31.6082	9.80405	1.51378	1.51097
			21.7687	31.5781	9.8094	1.50817
		7	21.5694	30.5644	8.99508	2.65207	2.0333
			21.7515	31.6534	9.90189	1.41452
		8	21.6215	32.0139	10.3924	1.00678	1.14887
			21.5499	31.5836	10.0338	1.29095
	ob/+, Rosi	1	21.9685	32.6269	10.6584	0.837303	0.704881	1.0408	0.546064	0.206393	0.51932	0.00280945
			21.9857	33.1926	11.207	0.572458
		2	21.9973	31.7464	9.74912	1.57253	1.54114
			22.1325	31.9404	9.80788	1.50976
		3	22.2231	31.3901	9.16705	2.35405	1.83241
			22.1092	32.121	10.0118	1.31077
		4	22.3974	32.6533	10.2559	1.10675	0.935366
			22.8471	33.6377	10.7906	0.763983
		5	22.8446	32.9481	10.1035	1.23001	1.19098
			22.9722	33.1703	10.1981	1.15194
		6	23.3608	36.9569	13.5961	0.109279	0.176517
			23.3617	35.8004	12.4387	0.243755
		7	21.8625	32.7833	10.9209	0.698023	0.904327
			21.8883	32.1391	10.2508	1.11063
	ob/ob +Rosi	1	21.9952	31.3407	9.3455	2.08017	1.9989	1.27335	0.615123	0.232495	0.281637	0.0236288
			21.9817	31.4446	9.46288	1.91762
		2	21.3289	31.5721	10.2432	1.11652	1.27432
			21.5356	31.4197	9.88405	1.43212
		3	21.7029	32.9712	11.2684	0.548603	0.685187
			22.2947	32.9801	10.6854	0.821771
		4	21.7431	33.1173	11.3742	0.509801	0.438719
			21.7699	33.6157	11.8458	0.367637
		5	22.1559	31.4369	9.28098	2.17531	2.08623
			21.9242	31.3285	9.40426	1.99715
		6	21.6095	32.0916	10.4821	0.946097	1.08521
			21.6816	31.7918	10.1102	1.22432
		7	22.3754	32.2151	9.83972	1.47681	1.34492
			22.4366	32.5602	10.1236	1.21302

## Sheet: Fig1D
	Chow				HFD
Sample#	1	2	3	4	1	2	3	4
Density	26.875	2.671	17.425	17.068	66.337	55.678	79.171	79.372	Dnmt3a
Density	17.924	23.012	21.093	27.645	13.762	18.52	30.807	38.593	Actin
	1.49939	0.11607	0.826103	0.617399	4.8203	3.00637	2.5699	2.05664	Dnmt3a/Actin
AVG	0.76474				3.1133
STD	0.573281				1.20237
SEM	0.405371				0.850205
P-value	0.0124241
