# Supplementary material for: Dnmt3a is an epigenetic mediator of adipose insulin resistance
Source: eLife. 2017 Nov 1;6:e30766. doi: 10.7554/eLife.30766 (PMC5730374; doi:10.7554/eLife.30766)
Supplement: Figure 2—figure supplement 1—source data 1. [file elife-30766-fig2-figsupp1-data1.xlsx]

## Sheet: 1A
														AVG Fold	STD	SEM	p-value
			cyclophilin	Dnmt1		4.0683	Fold exp	AVG Fold	STD	SEM	p-value		shScr	1.1106	0.414174	0.239124
	shScr	1	22.03	25.1258	3.09583	1.96219	1.45614	1.1106	0.414174	0.239124			shDnmt1 #1	0.365852	0.255058	0.147258	0.0568644
			22.1506	26.2928	4.14216	0.95009							shDnm1 #2	0.298188	0.122198	0.0705512	0.0311219
		2	21.1086	25.5835	4.47486	0.75442	1.22418
			22.2838	25.5917	3.30792	1.69394
		3	21.1749	26.0217	4.84685	0.582952	0.651491
			20.7324	25.2746	4.54217	0.720029
	shDnmt1 #1	1	20.4602	27.9121	7.45194	0.0958122	0.199705	0.365852	0.255058	0.147258	0.0568644
			21.1979	26.9859	5.78806	0.303598
		2	21.4558	26.3493	4.89351	0.5644	0.659522
			21.6455	26.1199	4.47443	0.754644
		3	21.4443	27.1231	5.67884	0.327475	0.23833
			20.2104	27.0236	6.81313	0.149184
	shDnm1 #2	1	20.3006	27.128	6.82742	0.147714	0.211624	0.298188	0.122198	0.0705512	0.0311219
			21.7051	27.6331	5.92799	0.275535
		2	21.2699	26.8662	5.59634	0.346747	0.437971
			22.6013	27.5877	4.98642	0.529196
		3	21.6611	27.4469	5.78575	0.304085	0.244969
			20.7312	27.2272	6.49606	0.185854
		27.8654
		28.4395
		27.7674
		28.2663
		27.6783
		27.6703
		29.715
		27.5868
		30.5401
		30.9695
		29.1867
		28.3793
		NaN
		30.213
		31.3435
		31.0435
		30.2003
		29.5597
		30.7828
		28.8975
		30.0892
		29.9597
		30.5898
		34.0721
		26.441
		26.2369
		26.3107
		26.4096
		26.6075
		26.947
		26.9418
		26.3795
		31.3669
		26.8533
		27.1196
		27.069

## Sheet: 1B
			cyclophilin	Dnmt3a		4.9013	Fold exp	AVG Fold	STD	SEM	p-value			AVG Fold	STD	SEM	p-value
	shScr	1	22.03	26.7682	4.73822	1.11968	1.39004	1.24658	0.400898	0.231459			shScr	1.24658	0.400898	0.231459
			22.1506	26.3204	4.16977	1.6604							shDnmt3a #1	0.228901	0.0837326	0.048343	0.0126064
		2	21.1086	26.0777	4.96913	0.954074	1.55601						shDnm3a #2	0.149328	0.0586484	0.0338606	0.00937314
			22.2838	26.0755	3.79165	2.15794
		3	21.1749	25.5898	4.41497	1.40088	0.793687
			21.7324	29.0565	7.32408	0.186497
	shDnmt3a #1	1	21.4602	28.3759	6.91577	0.247507	0.255516	0.228901	0.0837326	0.048343	0.0126064
			22.1979	29.0232	6.82529	0.263525
		2	20.4558	28.8832	8.42736	0.0868061	0.135095
			22.6455	29.9938	7.34836	0.183385
		3	22.4443	28.8719	6.42761	0.347165	0.296091
			22.2104	29.1408	6.93035	0.245017
	shDnm3a #2	1	21.3006	31.464	10.1634	0.026059	0.104937	0.149328	0.0586484	0.0338606	0.00937314
			22.7051	30.0501	7.34498	0.183815
		2	22.2699	29.4403	7.17044	0.207455	0.215814
			22.6013	29.6599	7.05861	0.224174
		3	21.6611	29.0686	7.40752	0.176017	0.127232
			20.7312	29.3046	8.57345	0.0784465

## Sheet: 1C
		cyclophilin	Dnmt3b		8.35418	Fold exp	AVG Fold	STD	SEM	p-value				AVG Fold	STD	SEM	p-value
shScr	1	24.1258	31.4769	7.35107	2.00431	1.27336	1.10099	0.268475	0.155004				shScr	1.10099	0.268475	0.155004
		21.2928	30.5295	9.23673	0.542406								shDnmt3b #1	0.39008	0.146575	0.084625	0.0157916
	2	21.5835	30.4991	8.91569	0.67759	0.791659							shDnm3b #2	0.321133	0.354299	0.204555	0.0384541
		22.5917	31.0888	8.49703	0.905728
	3	23.0217	31.2997	8.27793	1.05427	1.23796
		25.2746	33.1212	7.8466	1.42166
shDnmt3b #1	1	21.6121	31.7156	10.1035	0.297444	0.291544	0.39008	0.146575	0.084625	0.0157916
		20.9859	31.1478	10.1619	0.285645
	2	21.2493	30.4151	9.16578	0.569749	0.558521
		21.0199	30.2437	9.22379	0.547292
	3	21.4231	31.1732	9.75004	0.380016	0.320174
		21.4236	31.7193	10.2958	0.260332
shDnm3b #2	1	21.128	32.6559	11.5279	0.110819	0.125875	0.321133	0.354299	0.204555	0.0384541
		21.6331	32.8142	11.1811	0.140931
	2	30.1666	N/A			0.730103
		21.2877	30.0957	8.808	0.730103
	3	22.0469	33.251	11.2041	0.138704	0.107421
		21.2272	33.2967	12.0694	0.0761372
