# Supplementary material for: Dnmt3a is an epigenetic mediator of adipose insulin resistance
Source: eLife. 2017 Nov 1;6:e30766. doi: 10.7554/eLife.30766 (PMC5730374; doi:10.7554/eLife.30766)
Supplement: Figure 2—figure supplement 2—source data 1. [file elife-30766-fig2-figsupp2-data1.xlsx]

## Sheet: 2B, 2C
			Basal				Basal
			AVG	STD	SEM		AVG	STD	SEM	p-value		Delta	Delta AVG
shScr	Cont	121	161	23.3581	16.5167	1790	2036.5	200.047	141.454			1669	1875.5
		188				1789						1601			Dex	TNF
		180				2119						1939			0.610948	0.475162					shScr	Cont	161	23.3581	16.5167		2036.5	200.047	141.454
		162				2169						2007			0.389052	0.524838						Dex	105.167	42.9341	30.359		834.833	82.2421	58.154
		155				2262						2107										TNF	126.333	51.5754	36.4693		1110.67	143.303	101.331
		160				2090						1930				AVG	STD	SEM	P-value		shDnmt1 (#1)	Cont	128.333	52.3919	37.0466		2413	148.71	105.154
	Dex	145	105.167	42.9341	30.359	763	834.833	82.2421	58.154			618	729.667	0.329512	-9.74545	-6.51331e-15	8.44603	3.44808				Dex	138.667	56.6104	40.0296		907.5	44.212	31.2626	0.0857271
		102				764						662		0.352973	-5.90545							TNF	99.6667	40.6887	28.7713		1160.67	128.308	90.7278	0.538606
		87				880						793		0.422821	5.52727						shDnmt1 (#2)	Cont	190.5	77.7713	54.9926		2134.67	162.491	114.899
		98				760						662		0.352973	-5.90545							Dex	142.833	58.3115	41.2324		1098.67	234.682	165.946	0.0667176
		77				945						868		0.46281	12.0727							TNF	106	43.2743	30.5996		820	180.647	127.736	0.406565
		122				897						775		0.413223	3.95636
	TNF	148	126.333	51.5754	36.4693	1256	1110.67	143.303	101.331			1108	984.333	0.590776	13.8769	7.40149e-15	17.6584	7.20899
		120				924						804		0.428686	-20.2356
		76				1127						1051		0.560384	7.48083						shScr	Dex	-6.51331e-15	8.44603	3.44808
		90				1289						1199		0.639296	24.0883							TNF	7.40149e-15	17.6584	7.20899
		135				996						861		0.459078	-13.8395						shDnmt1 (#1)	Dex	3.41818	4.25813	1.73837	0.396837
		189				1072						883		0.470808	-11.3709							TNF	8.60295	17.1183	6.98853	0.411598
shDnmt1 (#1)	Cont	130	128.333	52.3919	37.0466	2611	2413	148.71	105.154			2481	2284.67								shDnmt1 (#2)	Dex	16.2327	20.6448	8.4282	0.104984
		79				2424						2345										TNF	-9.48569	16.427	6.70631	0.384097
		132				2256						2124
		155				2355						2200
		136				2269						2133
		138				2563						2425
	Dex	145	138.667	56.6104	40.0296	933	907.5	44.212	31.2626	0.0857271		788	768.833	0.420155	5.09091	3.41818	4.25813	1.73837	0.396837
		147				973						826		0.440416	8.40727
		123				908						785		0.418555	4.82909
		206				888						682		0.363636	-4.16
		90				841						751		0.400427	1.86182
		121				902						781		0.416422	4.48
	TNF	77	99.6667	40.6887	28.7713	1082	1160.67	128.308	90.7278	0.538606		1005	1061	0.535857	2.31906	8.60295	17.1183	6.98853	0.411598
		105				1111						1006		0.53639	2.43127
		167				988						821		0.43775	-18.328
		67				1228						1161		0.619035	19.8242
		88				1200						1112		0.592909	14.3258
		94				1355						1261		0.672354	31.0454
shDnmt1 (#2)	Cont	222	190.5	77.7713	54.9926	1865	2134.67	162.491	114.899			1643	1944.17
		267				2341						2074
		153				2133						1980
		203				2057						1854
		143				2222						2079
		155				2190						2035
	Dex	143	142.833	58.3115	41.2324	902	1098.67	234.682	165.946	0.0667176		759	915.667	0.404692	2.56	16.2327	20.6448	8.4282	0.104984
		94				1432						1338		0.71341	53.0909
		204				1220						1016		0.541722	24.9891
		135				828						693		0.369501	-3.2
		89				992						903		0.481472	15.1273
		103				888						785		0.418555	4.82909
	TNF	232	106	43.2743	30.5996	1232	820	180.647	127.736	0.406565		1000	899.8	0.533191	1.758	-9.48569	16.427	6.70631	0.384097
		89				840						751		0.400427	-26.1829
		99				967						868		0.46281	-13.054
		105				1202						1097		0.584911	12.6426
		105				888						783		0.417489	-22.5921
		132				203

## Sheet: 2D, 2E
			Basal					Basal
			AVG	STD	SEM			AVG	STD	SEM	p-value		Delta	Delta AVG									AVG	STD	SEM	AVG	STD	SEM	p-value
shScr	Cont	78	106.833	25.2223	10.297		1355	1242.5	169.725	69.2901			1277	1135.67							shScr	Cont	106.833	25.2223	10.297	1242.5	169.725	69.2901
		104					1293						1189			Dex	TNF					Dex	97.5	60.6984	24.78	450.5	44.8364	18.3044
		115					908						793			0.689169	0.680804					TNF	86.8333	18.0379	7.36395	449.333	34.7313	14.179
		120					1232						1112			0.310831	0.319196				shDnmt3b (#1)	Cont	112	37.5393	15.3254	1227.5	131.107	53.5243
		144					1345						1201									Dex	49.8333	8.99815	3.67348	454.667	53.6569	21.9054	0.886852
		80					1322						1242				AVG	STD	SEM	P-value		TNF	65.5	12.8491	5.24563	416.5	35.5514	14.5138	0.136694
	Dex	75	97.5	60.6984	24.78		511	450.5	44.8364	18.3044			436	353	0.383915	10.6048	0	10.8752	4.43977		shDnmt3b (#2)	Cont	123.833	22.1216	9.03112	1033.67	81.3896	33.2272
		87					432						345		0.303786	-1.02215						Dex	125.167	20.7308	8.46332	557	47.6193	19.4405	0.00256549
		67					450						383		0.337247	3.83305						TNF	69.5	23.6538	9.6566	518	13.8384	5.64948	0.00257359
		60					492						432		0.380393	10.0937
		220					430						210		0.184913	-18.2709
		76					388						312		0.274729	-5.2385
	TNF	68	86.8333	18.0379	7.36395		455	449.333	34.7313	14.179			387	362.5	0.340769	3.16879	2.51651e-15	4.05285	1.65457		shScr	Dex	0	10.8752	4.43977
		103					506						403		0.354858	5.2382						TNF	2.51651e-15	4.05285	1.65457
		111					465						354		0.311711	-1.09937					shDnmt3b (#1)	Dex	6.62266	6.40751	2.61585	0.227695
		82					422						340		0.299384	-2.91011						TNF	-1.48739	5.02126	2.04992	0.584777
		67					440						373		0.328441	1.35805					shDnmt3b (#2)	Dex	10.0724	8.15535	3.32941	0.0995828
		90					408						318		0.280012	-5.75555						TNF	11.1102	3.22257	1.31561	0.000791648
shDnmt3b (#1)	Cont	103	112	37.5393	15.3254		1335	1227.5	131.107	53.5243			1232	1115.5
		175					1257						1082
		120					1304						1184
		80					1325						1245
		124					1142						1018
		70					1002						932
	Dex	61	49.8333	8.99815	3.67348		422	454.667	53.6569	21.9054	0.886852		361	404.833	0.317875	1.02215	6.62266	6.40751	2.61585	0.227695
		45					430						385		0.339008	4.08859
		42					412						370		0.3258	2.17206
		57					487						430		0.378632	9.83816
		55					550						495		0.435867	18.1431
		39					427						388		0.34165	4.47189
	TNF	80	65.5	12.8491	5.24563		452	416.5	35.5514	14.5138	0.136694		372	351	0.327561	1.22871	-1.48739	5.02126	2.04992	0.584777
		60					450						390		0.343411	3.5568
		53					396						343		0.302025	-2.5221
		83					380						297		0.26152	-8.47165
		55					443						388		0.34165	3.29812
		62					378						316		0.278251	-6.01423
shDnmt3b (#2)	Cont	156	123.833	22.1216	9.03112		1004	1033.67	81.3896	33.2272			848	909.833
		121					1111						990
		107					1142						1035
		93					1036						943
		132					986						854
		134					923						789
	Dex	133	125.167	20.7308	8.46332		541	557	47.6193	19.4405	0.00256549		408	431.833	0.35926	7.02726	10.0724	8.15535	3.32941	0.0995828
		154					555						401		0.353097	6.13288
		94					644						550		0.484297	25.1704
		132					523						391		0.344291	4.8552
		128					510						382		0.336366	3.70528
		110					569						459		0.404168	13.5434
	TNF	56	69.5	23.6538	9.6566		520	518	13.8384	5.64948	0.00257359		464	448.4	0.408571	13.1278	11.1102	3.22257	1.31561	0.000791648
		80					513						433		0.381274	9.11834
		111					532						421		0.370707	7.56629
		45					528						483		0.425301	15.5853
		56					497						441		0.388318	10.1531
		69					80
