# Supplementary material for: Dnmt3a is an epigenetic mediator of adipose insulin resistance
Source: eLife. 2017 Nov 1;6:e30766. doi: 10.7554/eLife.30766 (PMC5730374; doi:10.7554/eLife.30766)
Supplement: Figure 2—source data 1. [file elife-30766-fig2-data1.xlsx]

## Sheet: Fig2A
Exp1			Basal				Insulin
		Basal	AVG	STD	SEM	Insulin	AVG	STD	SEM	p-value		Delta (Basal-Insulin)	Delta AVG
shScr	Cont	244	249	40.1746	16.4012	1603	1896.17	162.823	66.4723			1359	1647.17									Basal			Insulin
		199				1843						1644			Dex	TNF						AVG	STD	SEM	AVG	STD	SEM
		255				1979						1724			0.740644	0.752985				shScr	Cont	249	40.1746	16.4012	1896.17	162.823	66.4723
		232				1901						1669			0.259356	0.247015					Dex	201.333	56.3442	23.0024	628.5	123.992	50.6193
		321				1984						1663									TNF	204.833	62.3616	25.459	611.667	53.5375	21.8566
		243				2067						1824				AVG	STD	SEM	P-value	shDnmt3a (#1)	Cont	206.5	35.0642	14.3149	2135.33	135.073	55.1432
	Dex	176	201.333	56.3442	23.0024	565	628.5	123.992	50.6193			389	427.167	0.236163	-3.13151	0	11.1831	4.56547			Dex	155.167	36.2514	14.7996	929.333	104.345	42.5986
		232				544						312		0.189435	-9.44059						TNF	166.667	38.9855	15.9158	1125.5	117.309	47.8914
		177				829						652		0.395871	18.4319					shDnmt3a (#2)	Cont	219.833	59.9747	24.4846	2145	131.336	53.6178
		301				676						375		0.227687	-4.27598						Dex	131.667	37.7977	15.4308	1124.5	46.3023	18.9028
		145				674						529		0.32119	8.34863						TNF	165.167	36.5043	14.9028	1056.5	87.466	35.7078
		177				483						306		0.185792	-9.93246
	TNF	222	204.833	62.3616	25.459	585	611.667	53.5375	21.8566			363	406.833	0.220401	-3.53447	1.77636e-15	3.80041	1.55151
		154				619						465		0.282332	4.69023							AVG	STD	SEM
		321				709						388		0.23558	-1.51861					shScr	Dex	6.51331e-15	11.1829	4.56542
		176				589						413		0.250759	0.497245						TNF	1.77636e-15	3.80041	1.55151
		158				616						458		0.278081	4.12579					shDnmt3a (#1)	Dex	28.4465	8.10856	3.31031
		198				552						354		0.214936	-4.26018						TNF	44.5101	10.4336	4.25952
shDnmt3a (#1)	Cont	207	206.5	35.0642	14.3149	2056	2135.33	135.073	55.1432			1849	1928.83							shDnmt3a (#2)	Dex	46.3725	3.06534	1.25142
		267				2122						1855									TNF	39.0673	8.94229	3.65068
		167				2362						2195
		222				2043						1821
		187				2224						2037
		189				2005						1816
	Dex	143	155.167	36.2514	14.7996	757	929.333	104.345	42.5986	0.00106294		614	774.167	0.372799	15.3168	28.4469	8.10852	3.31029	0.000503351
		190				910						720		0.437158	24.0064
		205				1075						870		0.528233	36.3031
		154				906						752		0.456588	26.6297
		129				954						825		0.500911	32.6141
		110				974						864		0.52459	35.8112
	TNF	232	166.667	38.9855	15.9158	1131	1125.5	117.309	47.8914	1.98378e-06		899	958.833	0.545841	39.6855	44.5101	10.4336	4.25952	1.87961e-06
		167				1231						1064		0.646023	52.9902
		110				1176						1066		0.647237	53.1515
		156				1187						1031		0.625987	50.3293
		169				899						730		0.44323	26.0583
		166				1129						963		0.584699	44.8461
shDnmt3a (#2)	Cont	256	219.833	59.9747	24.4846	2062	2145	131.336	53.6178			1806	1925.17
		156				2039						1883
		319				2026						1707
		222				2337						2115
		178				2131						1953
		188				2275						2087
	Dex	135	131.667	37.7977	15.4308	1133	1124.5	46.3023	18.9028	3.46374e-06		998	992.833	0.60595	46.7963	46.3727	3.06533	1.25141	1.91954e-06
		202				1153						951		0.577413	42.9433
		133				1182						1049		0.636916	50.9772
		121				1137						1016		0.616879	48.2719
		99				1053						954		0.579235	43.1893
		100				1089						989		0.600486	46.0585
	TNF	167	165.167	36.5043	14.9028	1028	1056.5	87.466	35.7078	9.09315e-07		861	891.333	0.522769	36.6214	39.0673	8.94229	3.65068	1.82736e-06
		232				960						728		0.442016	25.8971
		144				954						810		0.491803	32.5091
		135				1148						1013		0.615058	48.8778
		175				1124						949		0.576199	43.7172
		138				1125						987		0.599271	46.7813
Exp2			Basal				Insulin
			AVG	STD	SEM		AVG	STD	SEM	p-value		Delta	Delta AVG
shScr	Cont	143	248.167	91.903	37.5193	2353	2096.33	188.188	76.8274			2210	1848.17
		131				2253						2122			Dex	TNF
		253				2110						1857			0.413292	0.579042
		342				1876						1534			0.586708	0.420958
		332				2084						1752
		288				1902						1614				AVG	STD	SEM	P-value
	Dex	143	185.833	27.8813	11.3825	1352	1270.17	193.252	78.8946			1209	1084.33	0.654162	16.3212	0	27.1059	11.0659
		167				1523						1356		0.7337	35.5662
		205				1390						1185		0.641176	13.1791
		222				1143						921		0.498332	-21.3834
		188				1233						1045		0.565425	-5.14947
		190				980						790		0.427451	-38.5337
	TNF	205	157	90.5097	36.9504	982	935	101.619	41.4857			777	778	0.420417	-0.0934434	3.70074e-15	14.2211	5.80574
		303				892						589		0.318694	-17.6608
		110				760						650		0.3517	-11.9608
		90				1021						931		0.503742	14.2968
		56				1032						976		0.528091	18.5018
		178				923						745		0.403102	-3.08363
shDnmt3a (#1)	Cont	264	226.333	51.032	20.8337	2213	2261	198.166	80.9008			1949	2034.67
		225				2432						2207
		178				2478						2300
		302				2305						2003
		222				2214						1992
		167				1924						1757
	Dex	143	144.167	28.117	11.4787	1534	1647.17	85.0821	34.7346	0.00139162		1391	1503	0.752638	40.1484	54.8113	11.7827	4.81026	0.0010705
		167				1734						1567		0.847867	63.1901
		98				1722						1624		0.878709	70.6524
		143				1683						1540		0.833258	59.6552
		135				1553						1418		0.767247	43.6832
		179				1657						1478		0.799711	51.5383
	TNF	133	141	25.807	10.5357	1533	1477.17	121.37	49.5489	7.74489e-06		1400	1336.17	0.757507	58.1218	52.157	11.965	4.88471	4.32817e-05
		180				1553						1373		0.742898	55.5988
		153				1232						1079		0.583822	28.1265
		102				1523						1421		0.76887	60.0841
		145				1499						1354		0.732618	53.8234
		133				1523						1390		0.752097	57.1874
shDnmt3a (#2)	Cont	222	238.667	63.1337	25.7742	2214	2142.67	144.76	59.098			1992	1904
		254				2309						2055
		127				2053						1926
		289				2287						1998
		235				1982						1747
		305				2011						1706
	Dex	222	217.333	55.3341	22.5901	1455	1485.83	76.6066	31.2745	0.0293017		1233	1268.5	0.667148	19.4632	24.1108	12.7167	5.19157	0.0768189
		253				1582						1329		0.719091	32.0314
		189				1523						1334		0.721796	32.686
		145				1408						1263		0.68338	23.3908
		303				1398						1095		0.592479	1.39647
		192				1549						1357		0.734241	35.6971
	TNF	121	142.5	50.6271	20.6684	1542	1447.33	169.038	69.0095	8.21484e-05		1421	1304.83	0.76887	60.0841	49.2291	18.2777	7.46185	0.000397258
		146				1143						997		0.539454	20.4641
		98				1492						1394		0.754261	57.5611
		156				1485						1329		0.719091	51.4873
		234				1389						1155		0.624944	35.2282
		100				1633						1533		0.829471	70.5498
Exp3			Basal				Insulin
			AVG	STD	SEM		AVG	STD	SEM	p-value		Delta	Delta AVG
shScr	Cont	334	245	71.5654	29.2164	1765	1996.6	185.22	75.6156			1431	1752.4
		312				1908						1596			Dex	TNF
		220				2231						2011			0.556703	0.51847
		219				1947						1728			0.443297	0.48153
		136				2132						1996
		249				676						N/A				AVG	STD	SEM	P-value
	Dex	145	135.667	40.3518	16.4735	1108	912.5	117.998	48.1724			963	776.833	0.549532	19.0829	0	11.8252	4.82762
		134				986						852		0.48619	7.70492
		100				879						779		0.444533	0.222093
		103				835						732		0.417713	-4.59562
		122				777						655		0.373773	-12.4885
		210				890						680		0.388039	-9.92586
	TNF	89	132.167	62.2171	25.4	1065	976	71.5178	29.197			976	843.833	0.55695	14.5467	-6.9574e-15	7.95795	3.24882
		78				955						877		0.500457	3.65044
		108				909						801		0.457087	-4.71439
		210				1035						825		0.470783	-2.07286
		213				1007						794		0.453093	-5.48483
		95				885						790		0.45081	-5.92508
shDnmt3a (#1)	Cont	223	260.5	64.6862	26.408	2221	2080.17	96.0488	39.2117			1998	1819.67
		257				1989						1732
		322				2106						1784
		219				2113						1894
		188				2098						1910
		354				1954						1600
	Dex	222	145	41.4295	16.9135	1243	1259.5	108.556	44.3176	0.000346957		1021	1114.5	0.58263	25.0282	34.6124	11.8496	4.83757	0.000488758
		108				1354						1246		0.711025	48.0917
		146				1228						1082		0.617439	31.281
		112				1178						1066		0.608309	29.6409
		150				1421						1271		0.725291	50.6543
		132				1133						1001		0.571217	22.9781
	TNF	130	114.833	30.5249	12.4617	1219	1277.33	157.726	64.3913	0.00165767		1089	1162.5	0.621433	26.9839	35.0736	19.796	8.08167	0.00241227
		154				987						833		0.475348	-1.19235
		99				1354						1255		0.716161	45.2544
		107				1432						1325		0.756106	52.9589
		132				1338						1206		0.688199	39.8613
		67				1334						1267		0.723008	46.5752
shDnmt3a (#2)	Cont	224	209.167	40.3158	16.4589	2222	2076.83	191.798	78.3013			1998	1867.67
		254				2310						2056
		223				1785						1562
		231				1932						1701
		143				2088						1945
		180				2124						1944
	Dex	243	161.667	89.0049	36.3361	1324	1297.83	48.9629	19.989	2.34696e-05		1081	1136.17	0.616868	31.1785	36.8333	11.0863	4.52597	0.000238679
		266				1287						1021		0.58263	25.0282
		215				1255						1040		0.593472	26.9758
		90				1367						1277		0.728715	51.2693
		86				1234						1148		0.655102	38.0463
		70				1320						1250		0.713307	48.5017
	TNF	133	170.5	40.1535	16.3926	1321	1338.4	147.055	60.0351	0.000454437		1188	1158.6	0.677927	37.8802	34.6443	14.855	6.06454	0.000784613
		159				1188						1029		0.587195	20.3801
		187				1532						1345		0.767519	55.1601
		232				1439						1207		0.68877	39.9714
		188				1212						1024		0.584341	19.8298
		124				555

## Sheet: Fig2C, 3C
Exp1
				AVG		STD		SEM				AVG	AVG	STD	STD	SEM	SEM
		Basal	Insulin	Basal	Insulin	Basal	Insulin	Basal	Insulin	P-value		Basal	Insulin	Basal	Insulin	Basal	Insulin
	pCDH	232	2156	246.5	2451.67	38.3653	224.644	15.6626	91.7107		pCDH	246.5	2451.67	38.3653	224.644	15.6626	91.7107
		189	2622								Dnmt1	214.833	2207.67	28.3296	303.948	11.5655	124.086
		268	2212								Dnmt3a	202	1433.5	36.6824	108.747	14.9755	44.3958
		232	2712								Dnmt3b	207.167	1519.5	41.4845	109.557	16.936	44.7264
		256	2555								Dnmt3a_CM	246	2212	44.1769	163.913	18.0352	66.9174
		302	2453
	Dnmt1	212	1987	214.833	2207.67	28.3296	303.948	11.5655	124.086	0.144881
		256	1813
		184	2213
		183	2657
		232	2434
		222	2142
	Dnmt3a	223	1578	202	1433.5	36.6824	108.747	14.9755	44.3958	1.60026e-06
		201	1547
		135	1429
		198	1355
		212	1390
		243	1302
	Dnmt3b	243	1434	207.167	1519.5	41.4845	109.557	16.936	44.7264	3.61641e-06
		221	1557
		167	1342
		145	1630
		245	1555
		222	1599
	Dnmt3a_CM	212	2341	246	2212	44.1769	163.913	18.0352	66.9174	0.0609328
		189	2268
		310	2222
		254	2190
		278	1903
		233	2348
Exp2
				AVG		STD		SEM
		Basal	Insulin	Basal	Insulin	Basal	Insulin	Basal	Insulin	P-value
	pCDH	154	1573	209.667	1671.17	59.3925	125.937	24.2469	51.4136
		188	1745
		195	1545
		320	1886
		228	1645
		173	1633
	Dnmt1	292	1821	203.5	1601	72.5197	131.569	29.606	53.7128	0.367568
		154	1543
		109	1609
		168	1433
		220	1543
		278	1657
	Dnmt3a	232	1132	231	950	62.6163	149.037	25.563	60.8441	3.92392e-06
		286	909
		301	891
		132	1132
		190	769
		245	867
	Dnmt3b	342	875	215.167	827	87.7848	156.76	35.838	63.9969	1.22978e-06
		163	643
		224	904
		291	656
		160	1054
		111	830
	Dnmt3a_CM	173	1854	245.333	1615.33	94.2012	188.246	38.4575	76.8512	0.559396
		356	1342
		349	1765
		127	1511
		203	1532
		264	1688
				AVG		STD		SEM
Exp3		Basal	Insulin	Basal	Insulin	Basal	Insulin	Basal	Insulin	P-value
	pCDH	201	1876	297.167	1885	112.863	130.352	46.0763	53.2159
		178	1904
		335	2034
		428	1824
		422	2000
		219	1672
	Dnmt1	222	1864	177.167	1869.67	46.8462	74.8723	19.1249	30.5665	0.00776525
		108	1867
		218	1956
		132	1772
		197	1953
		186	1806
	Dnmt3a	217	809	193.667	1079.67	65.2063	295.022	26.6204	120.442	0.00111392
		183	709
		111	1214
		135	1532
		290	1093
		226	1121
	Dnmt3b	124	1221	171.167	1041.5	105.397	199.253	43.0282	81.3448	6.52782e-05
		156	1328
		87	875
		155	853
		380	900
		125	1072
	Dnmt3a_CM	222	1888	215.5	1860.17	45.9772	148.311	18.7701	60.5477	0.0386517
		257	2094
		167	1650
		178	1875
		188	1764
		281	1890

## Sheet: Fig2D
Exp1
				AVG		STD		SEM				AVG		STD		SEM
		Basal	Insulin	Basal	Insulin	Basal	Insulin	Basal	Insulin	P-value		Basal	Insulin	Basal	Insulin	Basal	Insulin	p-value
pCDH	1	302	1322	401.667	1147.67	127.107	131.698	51.8913	53.7653		pCDH	401.667	1147.67	127.107	131.698	51.8913	53.7653
	2	521	1194								Dnmt3a	298	550	87.5785	247.232	35.7538	100.932	0.000386386
	3	223	1034
	4	432	1123
	5	378	970
	6	554	1243
Dnmt3a	1	276	806	298	550	87.5785	247.232	35.7538	100.932	0.000386386
	2	176	888
	3	397	314
	4	352	436
	5	365	311
	6	222	545
Exp2				AVG		STD		SEM				AVG		STD		SEM
		Basal	Insulin	Basal	Insulin	Basal	Insulin	Basal	Insulin	P-value		Basal	Insulin	Basal	Insulin	Basal	Insulin	p-value
pCDH	1	323	1002	360.667	1025.33	118.997	269.57	48.5803	110.051		pCDH	360.667	1025.33	118.997	269.57	48.5803	110.051
	2	543	783								Dnmt3a	334.667	601.333	107.152	48.0611	43.7445	19.6209	0.00352639
	3	380	1032
	4	228	1543
	5	439	860
	6	251	932
Dnmt3a	1	323	634	334.667	601.333	107.152	48.0611	43.7445	19.6209	0.00352639
	2	222	573
	3	378	671
	4	344	568
	5	229	543
	6	512	619
