# Supplementary material for: Dnmt3a is an epigenetic mediator of adipose insulin resistance
Source: eLife. 2017 Nov 1;6:e30766. doi: 10.7554/eLife.30766 (PMC5730374; doi:10.7554/eLife.30766)
Supplement: Figure 3—figure supplement 1—source data 1. [file elife-30766-fig3-figsupp1-data1.xlsx]

## Sheet: C, D
TF-3																								AVG	STD	SEM	AVG	STD	SEM	p-value				AVG	STD	SEM	p-value
			Basal					Basal														(-)	Cont	221.333	61.3895	43.4089	2028.67	169.045	119.533			(-)	Dex	-1.16943e-14	17.5168	7.15122
			AVG	STD	SEM			AVG	STD	SEM	p-value			Delta	Delta AVG								Dex	143	26.1687	18.5041	880.5	172.122	121.708				TNF	3.55271e-15	11.0793	4.52312
(-)	Cont	254	221.333	61.3895	43.4089		2275	2028.67	169.045	119.533				2021	1807.33								TNF	234.5	61.8086	43.7053	920.833	71.5805	50.6151			10uM	Dex	18.4141	17.5755	7.17516	0.0991447
		188					1865							1677			Dex	TNF				10uM	Cont	163.333	81.1016	57.3475	2178.33	217.193	153.578				TNF	32.9765	28.9656	11.8251	0.0262814
		173					2042							1869			0.59194	0.620251					Dex	182	53.8294	38.0631	1116.5	162.531	114.927	0.0347352			Dex	44.5864	13.8625	5.65936	0.00063337
		332					1997							1665			0.40806	0.379749					TNF	250.167	68.2801	48.2813	1306.17	285.911	202.17	0.00945267		25uM	TNF	73.0746	8.78519	3.58654	1.76419e-07
		200					1835							1635								25uM	Cont	236.333	77.1043	54.5209	2304	217.184	153.572
		181					2158							1977				AVG	STD	SEM	P-value		Dex	223.833	73.543	52.0027	1438.33	97.3091	68.8079	4.1403e-05
	Dex	121	143	26.1687	18.5041		705	880.5	172.122	121.708				584	737.5	0.323128	-14.348	-1.16943e-14	17.5168	7.15122			TNF	131.333	103.869	73.4461	1636.83	113.424	80.2028	8.86136e-07
		167					777							610		0.337514	-11.9177
		180					781							601		0.332534	-12.759
		122					1054							932		0.515677	18.1804
		120					1134							1014		0.561048	25.8451
		148					832							684		0.378458	-5.00078
	TNF	132	234.5	61.8086	43.7053		1055	920.833	71.5805	50.6151				923	686.333	0.510697	21.1121	3.55271e-15	11.0793	4.52312
		201					878							677		0.374585	-0.83259
		227					920							693		0.383438	0.594707
		300					888							588		0.325341	-8.77193
		280					931							651		0.360199	-3.15195
		267					853							586		0.324235	-8.95034
10uM	Cont	321	163.333	81.1016	57.3475		2311	2178.33	217.193	153.578				1990	2015
		124					1987							1863
		170					1944							1774
		111					2342							2231
		104					2029							1925
		150					2457							2307
	Dex	121	182	53.8294	38.0631		1343	1116.5	162.531	114.927	0.0347352			1222	934.5	0.676134	45.2874	18.4141	17.5755	7.17516	0.0991447
		205					1010							805		0.445408	6.30939
		224					905							681		0.376798	-5.2812
		255					1248							993		0.549428	23.8822
		134					1154							1020		0.564367	26.406
		153					1039							886		0.490225	13.8807
	TNF	333	250.167	68.2801	48.2813		873	1306.17	285.911	202.17	0.00945267			540	1056	0.298783	-13.0538	32.9765	28.9656	11.8251	0.0262814
		243					1054							811		0.448727	11.121
		202					1542							1340		0.741424	58.311
		288					1331							1043		0.577093	31.8168
		145					1444							1299		0.718738	54.6536
		290					1593							1303		0.720952	55.0104
25uM	Cont	210	236.333	77.1043	54.5209		2222	2304	217.184	153.572				2012	2067.67
		322					2021							1699
		134					2558							2424
		189					2111							1922
		232					2433							2201
		331					2479							2148
	Dex	213	223.833	73.543	52.0027		1329	1438.33	97.3091	68.8079	4.1403e-05			1116	1214.5	0.617484	35.3793	44.5864	13.8625	5.65936	0.00063337
		180					1529							1349		0.746404	57.1584
		154					1432							1278		0.707119	50.5219
		365					1332							967		0.535042	21.4519
		221					1564							1343		0.743084	56.5976
		210					1444							1234		0.682774	46.4091
	TNF	111	131.333	103.869	73.4461		1606	1636.83	113.424	80.2028	8.86136e-07			1495	1505.5	0.827186	72.138	73.0746	8.78519	3.58654	1.76419e-07
		89					1632							1543		0.853744	76.4199
		80					1438							1358		0.751383	59.9167
		342					1772							1430		0.791221	66.3396
		88					1704							1616		0.894135	82.9319
		78					1669							1591		0.880302	80.7018

## Sheet: E, F
ECCG
			Basal					Basal
			AVG	STD	SEM			AVG	STD	SEM	p-value			Delta	Delta AVG									AVG	STD	SEM	AVG	STD	SEM	p-value				AVG	STD	SEM	p-value
(-)	Cont	400	356.167	38.2069	15.5979		1885	2354.83	364.572	148.836				1485	1998.67							(-)	Cont	356.167	38.2069	15.5979	2354.83	364.572	148.836			(-)	Dex	-1.33227e-14	14.714	6.00696
		348					1888							1540			Dex	TNF					Dex	233.833	165.268	67.4702	967.5	338.184	138.063				TNF	0	8.75618	3.5747
		377					2645							2268			0.632922	0.52977					TNF	168.833	42.6915	17.4287	1108.67	93.1851	38.0427			10uM	Dex	2.10804	16.1044	6.57461	0.81766
		387					2559							2172			0.367078	0.47023				10uM	Cont	383.5	65.8749	26.8933	2525.17	72.3088	29.52				TNF	18.5582	9.0551	3.69673	0.00477718
		320					2543							2223									Dex	383.5	68.7481	28.0663	1143.83	205.065	83.7175	0.3004		25uM	Dex	36.9565	13.3667	5.45693	0.00105211
		305					2609							2304				AVG	STD	SEM	P-value		TNF	209.167	40.6321	16.588	1345.5	93.5623	38.1966	0.00134937			TNF	37.6515	16.3125	6.65957	0.00081083
	Dex	231	233.833	165.268	67.4702		821	967.5	338.184	138.063				590	733.667	0.295197	-11.357	-1.33227e-14	14.714	6.00696		25uM	Cont	280.333	78.0145	31.8493	2640	71.0859	29.0207
		123					707							584		0.292195	-11.8314						Dex	153.833	28.5966	11.6745	1355	165.522	67.5742	0.0303387
		424					1438							1014		0.507338	22.1607						TNF	195	51.4587	21.0079	1533.5	148.183	60.4956	0.000485662
		448					1356							908		0.454303	13.7813
		88					805							717		0.358739	-1.31752
		89					678							589		0.294696	-11.4361
	TNF	150	168.833	42.6915	17.4287		1225	1108.67	93.1851	38.0427				1075	939.833	0.537859	12.7656	0	8.75618	3.5747
		204					1224							1020		0.51034	7.57123
		236					1083							847		0.423783	-8.76751
		123					1067							944		0.472315	0.393515
		160					1008							848		0.424283	-8.67307
		140					1045							905		0.452802	-3.28978
10uM	Cont	278	383.5	65.8749	26.8933		2433	2525.17	72.3088	29.52				2155	2141.67
		425					2538							2113
		390					2444							2054
		333					2607							2274
		423					2541							2118
		452					2588							2136
	Dex	270	383.5	68.7481	28.0663		907	1143.83	205.065	83.7175	0.3004			637	760.333	0.318712	-7.64163	2.10804	16.1044	6.57461	0.81766
		432					880							448		0.224149	-22.5823
		336					1322							986		0.493329	19.9473
		452					1143							691		0.34573	-3.37286
		421					1322							901		0.450801	13.2279
		390					1289							899		0.4498	13.0698
	TNF	255	209.167	40.6321	16.588		1222	1345.5	93.5623	38.1966	0.00134937			967	1136.33	0.483823	2.56572	18.5582	9.0551	3.69673	0.00477718
		223					1432							1209		0.604903	25.4211
		151					1239							1088		0.544363	13.9934
		236					1436							1200		0.6004	24.5711
		222					1365							1143		0.571881	19.1878
		168					1379							1211		0.605904	25.6099
25uM	Cont	436	280.333	78.0145	31.8493		2544	2640	71.0859	29.0207				2108	2359.67
		277					2698							2421
		231					2554							2323
		258					2673							2415
		239					2691							2452
		241					2680							2439
	Dex	178	153.833	28.5966	11.6745		1110	1355	165.522	67.5742	0.0303387			932	1201.17	0.466311	15.6785	36.9565	13.3667	5.45693	0.00105211
		192					1386							1194		0.597398	36.39
		154					1557							1403		0.701968	52.9117
		112					1214							1102		0.551368	29.1173
		137					1474							1337		0.668946	47.6943
		150					1389							1239		0.619913	39.9473
	TNF	221	195	51.4587	21.0079		1276	1533.5	148.183	60.4956	0.000485662			1055	1338.5	0.527852	10.8768	37.6515	16.3125	6.65957	0.000552232
		264					1564							1300		0.650434	34.0154
		110					1658							1548		0.774516	57.4374
		187					1458							1271		0.635924	31.2766
		210					1675							1465		0.732989	49.5986
		178					1570							1392		0.696464	42.7042
