# Supplementary material for: Dnmt3a is an epigenetic mediator of adipose insulin resistance
Source: eLife. 2017 Nov 1;6:e30766. doi: 10.7554/eLife.30766 (PMC5730374; doi:10.7554/eLife.30766)
Supplement: Figure 3—source data 1. [file elife-30766-fig3-data1.xlsx]

## Sheet: Fig3A
	5-AZA
				Basal				Insulin
			Basal	AVG	STD	SEM	Insulin	AVG	STD	SEM	p-value					Delta	Delta AVG
	(-)	Cont	267	260.333	79.8716	32.6074	1617	1973.5	293.64	119.878				(-)	Cont	1350	1713.17
			167				2222									2055			Dex	TNF					Glucose uptake		Basal				Insulin
			320				1763									1443			0.55949	0.6595							AVG	STD	SEM		AVG	STD	SEM	p-value
			372				1820									1448			0.44051	0.3405					(-)	Cont	260.333	79.8716	32.6074		1973.5	293.64	119.878
			176				2387									2211										Dex	347.333	87.0486	35.5375		1102	67.2101	27.4384
			260				2032									1772				AVG	STD	SEM	P-value			TNF	412.5	53.4219	21.8094		995.833	216.962	88.5744
		Dex	200	347.333	87.0486	35.5375	1104	1102	67.2101	27.4384					Dex	904	754.667	0.527678	15.5799	-1.27306e-14	8.98827	3.66945			1uM	Cont	277.5	99.3756	40.5699		2093.83	220.428	89.9894	0.440765
			432				1188									756		0.441288	0.139106							Dex	230.333	51.438	20.9995		1419	102.104	41.6837	8.32809e-05
			305				1024									719		0.419691	-3.72109							TNF	290.5	70.6024	28.8233		1400	112.353	45.8679	0.0023163
			334				1067									733		0.427863	-2.26048						3uM	Cont	323.667	178.527	72.8833		2203.83	333.237	136.043	0.232743
			402				1176									774		0.451795	2.01704							Dex	186.167	85.6374	34.9613		1565.67	51.5778	21.0565	1.02405e-07
			411				1053									642		0.374745	-11.7545							TNF	384.167	212.683	86.8276		1737.5	90.4273	36.9168	1.59045e-05
		TNF	378	412.5	53.4219	21.8094	773	995.833	216.962	88.5744					TNF	395	583.333	0.230567	-16.6691	5.92119e-15	18.2334	7.44377
			343				789									446		0.260337	-12.1552
			478				834									356		0.207802	-20.121						Delta uptake
			465				1185									720		0.420274	12.0962								AVG	STD	SEM	p-value
			429				1200									771		0.450044	16.6101						(-)	Dex	-1.27306e-14	8.98827	3.66945
			382				1194									812		0.473976	20.239							TNF	5.92119e-15	18.2334	7.44377
	1uM	Cont	212	277.5	99.3756	40.5699	2096	2093.83	220.428	89.9894	0.440765			1uM	Cont	1884	1816.33								1uM	Dex	45.2791	10.1054	4.1255	9.4703e-06
			135				2323									2188										TNF	46.5703	12.242	4.99776	0.0004047
			270				1872									1602									3uM	Dex	65.1887	6.56158	2.67875	5.35247e-08
			289				1800									1511										TNF	68.1516	16.6215	6.7857	4.94285e-05
			423				2151									1728
			336				2321									1985
		Dex	212	230.333	51.438	20.9995	1233	1419	102.104	41.6837	8.32809e-05				Dex	1021	1188.67	0.595972	27.7865	45.2791	10.1054	4.1255	9.4703e-06
			278				1547									1269		0.740734	53.6602
			309				1432									1123		0.655511	38.4281
			178				1420									1242		0.724973	50.8433
			194				1443									1249		0.729059	51.5736
			211				1439									1228		0.716801	49.3827
		TNF	254	290.5	70.6024	28.8233	1555	1400	112.353	45.8679	0.0023163				TNF	1301	1109.5	0.759412	63.5197	46.5703	12.242	4.99776	0.0004047
			343				1303									960		0.560366	33.3383
			333				1530									1197		0.698706	54.3148
			379				1327									948		0.553361	32.2761
			231				1322									1091		0.636832	44.9329
			203				1363									1160		0.677109	51.04
	3uM	Cont	121	323.667	178.527	72.8833	2543	2203.83	333.237	136.043	0.232743			3uM	Cont	2422	1880.17
			453				1894									1441
			90				2533									2443
			335				1834									1499
			432				2432									2000
			511				1987									1476
		Dex	111	186.167	85.6374	34.9613	1532	1565.67	51.5778	21.0565	1.02405e-07				Dex	1421	1379.5	0.829458	69.5183	65.1887	6.56158	2.67875	5.35247e-08
			165				1529									1364		0.796186	63.5716
			343				1652									1309		0.764082	57.8334
			222				1540									1318		0.769336	58.7724
			143				1534									1391		0.811947	66.3885
			133				1607									1474		0.860395	75.0478
		TNF	534	384.167	212.683	86.8276	1744	1737.5	90.4273	36.9168	1.59045e-05				TNF	1210	1353.33	0.706294	55.4654	68.1516	16.6215	6.7857	4.94285e-05
			231				1622									1391		0.811947	71.4855
			167				1789									1622		0.946785	91.931
			188				1654									1466		0.855725	78.1236
			655				1745									1090		0.636249	44.8444
			530				1871									1341		0.782761	67.06

## Sheet: Fig3B
RG-108				Basal					Insulin
				AVG	STD	SEM			AVG	STD	SEM	p-value			(-)	Cont	Delta	Delta AVG
	(-)	Cont	114	137	42.0048	17.1484		1371	1607.33	249.439	101.833						1257	1470.33
			204					1736									1532			Dex	TNF
			112					1354									1242			0.544661	0.690546
			90					1435									1345			0.455339	0.309454
			168					1838									1670
			134					1910								Dex	1776				AVG	STD	SEM	P-value
		Dex	87	154.667	49.9266	20.3825		811	824.167	49.4345	20.1815						724	669.5	0.492405	6.80541	3.62673e-15	6.26033	2.55577
			121					843									722		0.491045	6.55567
			190					850									660		0.448878	-1.18626
			222					898									676		0.45976	0.811655						Glucose uptake		Basal				Insulin
			176					768									592		0.40263	-9.67742						(-)	Cont	AVG	STD	SEM		AVG	STD	SEM	p-value
			132					775								TNF	643		0.437316	-3.30905							Dex	137	42.0048	17.1484		1607.33	249.439	101.833
		TNF	222	208.833	60.8652	24.8481		546	663.833	99.393	40.577						324	455	0.220358	-12.9022	0	12.9512	5.28729				TNF	154.667	49.9266	20.3825		824.167	49.4345	20.1815
			239					617									378		0.257085	-7.58372						30uM	Cont	208.833	60.8652	24.8481		663.833	99.393	40.577
			231					632									401		0.272727	-5.31845							Dex	326.667	79.8966	32.6177		1966.67	197.641	80.6865	0.0199333
			284					687									403		0.274088	-5.12147							TNF	159.667	50.8514	20.76		1086.17	87.7301	35.8157	8.10739e-05
			165					842									677		0.46044	21.8647						100uM	Cont	252.5	54.658	22.314		1210	252.5	54.658	6.26099e-07
			112					659							30uM	Cont	547		0.372024	9.06106							Dex	243.5	49.8307	20.3433		2071.33	252.5	54.658	0.0020103
	30uM	Cont	356	326.667	79.8966	32.6177		2201	1966.67	197.641	80.6865	0.0199333					1845	1640									TNF	235.833	49.0486	20.024		1225	252.5	54.658	3.99704e-07
			421					2014									1593											142.333	55.9452	22.8395		1416.83	252.5	54.658	1.64577e-08
			330					1900									1570
			219					2123									1904
			245					1639									1394									Delta uptake		AVG	STD	SEM	P-value
			389					1923								Dex	1534									(-)	Dex	3.62673e-15	6.26033	2.55577
		Dex	154	159.667	50.8514	20.76		1169	1086.17	87.7301	35.8157	8.10739e-05					1015	926.5	0.69032	43.1426	32.0916	9.01237	3.67929	3.05534e-05			TNF	0	12.9512	5.28729
			94					939									845		0.5747	21.9147						30uM	Dex	32.0916	9.01237	3.67929	3.05534e-05
			188					1142									954		0.648832	35.5255							TNF	49.4911	2.29103	0.935308	3.3375e-06
			243					1110									867		0.589662	24.6618						100uM	Dex	39.9168	11.4871	4.68957	2.12555e-05
			143					1023									880		0.598504	26.2851							TNF	80.7124	8.92358	3.64304	1.88549e-07
			136					1134								TNF	998		0.678758	41.0198
		TNF	289	252.5	54.658	22.314		1253	1210	252.5	54.658	6.26099e-07					964	957.5	0.655634	50.1313	49.4911	2.29103	0.935308	3.3375e-06
			156					1088									932		0.63387	46.9796
			302					1239									937		0.63727	47.4721
			222					1167									945		0.642711	48.26
			267					1257									990		0.673317	52.6921
			279					1256							100uM	Cont	977		0.664475	51.4117
	100uM	Cont	314	243.5	49.8307	20.3433		2077	2071.33	252.5	54.658	0.0020103					1763	1827.83
			219					2120									1901
			167					2215									2048
			243					2095									1852
			275					1867									1592
			243					2054								Dex	1811
		Dex	253	235.833	49.0486	20.024		1133	1225	252.5	54.658	3.99704e-07					880	989.167	0.598504	26.2851	39.9168	11.4871	4.68957	2.12555e-05
			183					1253									1070		0.727726	50.0104
			307					1222									915		0.622308	30.6556
			221					1155									934		0.63523	33.0281
			184					1290									1106		0.75221	54.5057
			267					1297								TNF	1030		0.700521	45.0156
		TNF	109	142.333	55.9452	22.8395		1437	1416.83	252.5	54.658	1.64577e-08					1328	1274.5	0.903197	85.9816	80.7124	8.92358	3.64304	1.88549e-07
			98					1499									1401		0.952845	93.1714
			78					1377									1299		0.883473	83.1254
			156					1408									1252		0.851508	78.4964
			209					1440									1231		0.837225	76.4281
			204					1340									1136		0.772614	67.0716
