# Supplementary material for: Dnmt3a is an epigenetic mediator of adipose insulin resistance
Source: eLife. 2017 Nov 1;6:e30766. doi: 10.7554/eLife.30766 (PMC5730374; doi:10.7554/eLife.30766)
Supplement: Figure 4—figure supplement 1—source data 1. [file elife-30766-fig4-figsupp1-data1.xlsx]

## Sheet: 1
															AVG	STD	SEM	p-value
													SVF	WT	1.07873	0.218903	0.126383
														KO	0.949377	0.142756	0.0824202	0.439617
			cyclophilin	Dnmt3a		7.13847	Fold Exp	AVG Fold	STD	SEM	p-value		ADS	WT	1.13401	0.358931	0.207229
SVF	WT	1	21.0832	29.1061	8.02288	0.541709	0.826911	1.07873	0.218903	0.126383				KO	0.138432	0.077843	0.0449427	0.00934228
			21.1198	28.1049	6.98516	1.11211							BAT	WT	1.11002	0.423357	0.244425
		2	21.4207	28.3385	6.91781	1.16526	1.22361							KO	0.266967	0.20098	0.116036	0.0356691
			22.6216	29.4017	6.78012	1.28196							Liver	WT	1.1499	0.22529	0.130071
		3	21.6661	29.4419	7.77582	0.642891	1.18565							KO	1.14704	0.0199886	0.0111473	0.999344
			22.0478	28.3968	6.34901	1.72842							Mus	WT	1.15125	0.551006	0.208038
	KO	1	21.2119	29.2653	8.05342	0.530361	0.814967	0.949377	0.142756	0.0824202	0.439617			KO	0.858664	0.242686	0.124828	0.447328
			21.6692	28.6708	7.00152	1.09957							Spleen	WT	1.14484	0.265743	0.153427
		2	22.1037	29.5543	7.45056	0.805471	0.933939							KO	1.15287	0.20397	0.117762	0.96887
			21.6992	28.7503	7.05113	1.06241
		3	22.6702	29.7522	7.08205	1.03988	1.09922
			22.4856	29.4117	6.92612	1.15857
			cyclophilin	Dnmt3a		4.29339	Fold Exp	AVG Fold	STD	SEM	p-value
ADS	WT	1	22.058	26.4503	4.39228	0.933749	1.21411	1.13401	0.358931	0.207229
			22.4741	26.1878	3.71375	1.49448
		2	23.4499	27.0667	3.61689	1.59826	1.44612
			23.0467	26.9683	3.92157	1.29399
		3	23.8634	27.9019	4.03856	1.1932	0.741796
			23.158	29.2353	6.07729	0.290396
	KO	1	22.9622	29.5592	6.59703	0.202551	0.162366	0.138432	0.077843	0.0449427	0.00934228
			22.3298	29.6561	7.32631	0.12218
		2	24.2776	30.6202	6.34259	0.241617	0.201498
			23.0804	30.0053	6.92486	0.161379
		3	23.6784	31.9995	8.32114	0.0613093	0.0514326
			23.0384	31.9206	8.88219	0.0415559
			cyclophilin	Dnmt3a		5.02699	Fold Exp	AVG Fold	STD	SEM	p-value
BAT	WT	1	22.0415	26.7245	4.68302	1.26924	1.04469	1.11002	0.423357	0.244425
			20.4477	25.7608	5.31307	0.820128
		2	20.1914	24.5802	4.38879	1.55639	1.56225
			20.3651	24.7431	4.37796	1.56812
		3	21.2144	26.1267	4.91233	1.08272	0.723135
			19.9144	26.4012	6.48678	0.363547
	KO	1	20.3586	27.8293	7.4707	0.183811	0.490221	0.266967	0.20098	0.116036	0.0356691
			21.9127	27.2678	5.35501	0.79663
		2	21.0224	30.3307	9.30833	0.0514268	0.210214
			22.5713	29.0366	6.4653	0.369001
		3	20.4702	28.8075	8.33735	0.100806	0.100465
			19.049	27.3961	8.34712	0.100125
			cyclophilin	Dnmt3a		7.96739	Fold Exp	AVG Fold	STD	SEM	p-value
Liver	WT	1	20.6419	28.7813	8.13932	0.887656	1.12132	1.1499	0.22529	0.130071
			20.7381	28.2672	7.52911	1.35499
		2	21.5161	28.8564	7.34024	1.54451	1.38812
			21.1809	28.8476	7.66671	1.23173
		3	21.0851	28.3664	7.28132	1.60889	0.940265
			20.1158	29.9634	9.84764	0.271637
	KO	1	20.2338	28.7183	8.48452	0.698762	1.10049	1.10797	0.0193078	0.0111473	0.764135
			21.6654	29.0457	7.3803	1.50222
		2	21.2501	28.7422	7.49203	1.39027	1.09352
			20.0526	28.3478	8.29517	0.796765
		3	20.6267	28.1793	7.55253	1.33317	1.1299
			20.1196	28.1969	8.07734	0.926622
			cyclophilin	Dnmt3a		5.91173	Fold Exp	AVG Fold	STD	SEM	p-value
Muscle	WT	1	20.9732	26.4992	5.52595	1.30656	1.3921	1.10272	0.360332	0.208038
			21.1136	26.462	5.34843	1.47765
		2	19.6844	26.675	6.99056	0.473412	0.699123
			20.0562	26.0806	6.02446	0.924834
		3	20.3947	26.8817	6.48705	0.671134	1.21693
			21.1842	26.2781	5.09391	1.76273
	KO	1	20.371	26.6578	6.28676	0.77109	0.719859	0.764983	0.216208	0.124828	0.236304
			19.7849	26.2773	6.49245	0.668627
		2	19.3441	26.2726	6.92848	0.494229	1.00019
			22.0116	27.3325	5.32086	1.50616
		3	19.9694	26.6798	6.71035	0.574897	0.574897
			19.2747	17.1951
			cyclophilin	Dnmt3a		8.89036	Fold Exp	AVG Fold	STD	SEM	p-value
Spleen	WT	1	17.2875	26.4695	9.18195	0.817002	0.881717	1.14484	0.265743	0.153427
			16.8717	25.8415	8.96978	0.946433
		2	17.2583	25.5022	8.2439	1.56531	1.13967
			17.0259	26.4023	9.37632	0.714019
		3	17.0478	26.9477	9.89987	0.496713	1.41313
			17.3576	25.0279	7.67031	2.32954
	KO	1	17.6616	26.5044	8.84279	1.03352	1.00327	1.15287	0.20397	0.117762	0.96887
			17.1113	26.0411	8.92982	0.973018
		2	16.7112	25.6356	8.92438	0.976693	1.38521
			17.3813	25.4287	8.0474	1.79372
		3	17.4392	26.1367	8.69749	1.14304	1.07013
			17.1199	26.0143	8.89438	0.997217
