# Supplementary material for: Dnmt3a is an epigenetic mediator of adipose insulin resistance
Source: eLife. 2017 Nov 1;6:e30766. doi: 10.7554/eLife.30766 (PMC5730374; doi:10.7554/eLife.30766)
Supplement: Figure 4—figure supplement 2—source data 1. [file elife-30766-fig4-figsupp2-data1.xlsx]

## Sheet: 2A
	WT	5	6	7	8	9	10	11	12	13	14	15	16	Wks
	1	15.34	18.3	21.55	23.35	25.45	26.4	28.1	30	31.1	32.3	34.5	34.9
	2	15.45	17.4	20.3	22.56	24.3	25.6	27.3	29.1	30.43	30.8	32.5	33.6
	3	16.3	19	21.67	23.76	25.56	28.8	30	30.4	31	31.56	33.16	35.13
	4	15.01	17.3	20	23.64	24.2	26.5	28.3	30.5	30.24	30.9	32.3	33.1
	5	16.3	17.56	21	23.98	26	28.3	30.1	30.5	31.4	33	34.2	35.7
	6	16.39	18.9	21.34	24.56	25.45	27.4	29.3	29.3	30.2	32.5	34.9	35.39
	7	17.8	19.33	22.29	25.64	28.3	29.35	31.2	30.4	30.56	31.6	33.12	34.12
	8	15.3	17.5	21.43	24.37	26	28.3	30.9	31.7	32	33.23	35.34	36.4
	AVG	15.9863	18.1613	21.1975	23.9825	25.6575	27.5813	29.4	30.2375	30.8662	31.9862	33.7525	34.7925
	STD	0.908593	0.824143	0.745841	0.911933	1.26943	1.31853	1.39694	0.807001	0.628261	0.914564	1.1355	1.11027
	SEM	0.321236	0.291379	0.263695	0.322417	0.448811	0.466171	0.493891	0.285318	0.222124	0.323347	0.401461	0.392541
	KO	5	6	7	8	9	10	11	12	13	14	15	16
	1	15.65	17.6	21	22.76	24.4	26	28.3	29	30.2	31.32	32.1	33.4
	2	16.5	19.2	23	23.96	25.66	29.2	31.1	31.4	31.23	32.4	32.2	32.9
	3	15.21	17.5	20.2	23.84	24.3	26.9	28.1	28.4	30.75	31.7	33.2	35.1
	4	16.5	17.76	21.2	24.18	26.1	28.7	30	31	31.5	32.54	32.7	34.1
	5	16.59	19.1	22	24.76	25.55	27.8	31	30.5	30.9	31.9	33.1	35.4
	6	18	19.53	23.13	25.84	28.4	29.75	31.45	28.55	31.2	33	35.2	36.03
	7	15.5	17.7	21.63	24.57	26.1	28.7	30.13	30.45	31.1	30.4	31.1	32.1
	8	16.1863	18.3612	22.78	24.1825	25.7575	29.2	31.32	32	33.75	35	36	35.9
	AVG	16.267	18.3439	21.8675	24.2616	25.7834	28.2812	30.175	30.1625	31.3287	32.2825	33.2	34.3663
	STD	16.3442	18.4369	21.9759	24.4493	25.9564	28.5664	30.4094	30.3078	31.4698	32.4028	33.3375	34.487
	SEM	5.77853	6.51843	7.76967	8.64412	9.17696	10.0997	10.7513	10.7154	11.1263	11.4561	11.7866	12.193
	p-value	0.538196	0.663991	0.164053	0.54253	0.845408	0.300207	0.274351	0.894951	0.30413	0.617024	0.445576	0.522489

## Sheet: 2B
Cohort1			0	15	30	60	120
	WT	1	113	226	271	154	121
		2	127	260	279	163	106
		3	111	201	176	130	116
		4	83	153	163	109	103
		5	89	258	223	185	98
		6	118	254	211	150	123
		7	126	182	185	148	115
		8	89	161	150	100	96
			124	221	216	139	115
		AVG	108.889	212.889	208.222	142	110.333
		STD	17.3742	41.1657	45.0688	26.3154	9.87421
		SEM	6.14269	14.5543	15.9342	9.3039	3.49106
	KO
		1	159	211	195	132	108
		2	137	247	215	194	116
		3	122	315	199	141	114
		4	123	266	202	148	106
		5	124	219	209	147	128
		6	144	232	225	147	117
		7	141	220	191	148	132
		8	256	223	235	223	222
		AVG	135.714	244.286	205.143	151	117.286
		STD	13.7078	36.4404	11.9503	19.8326	9.63871
		SEM	5.18107	13.7732	4.51679	7.49603	3.64309
		p-value	0.00479829	0.134406	0.863735	0.464623	0.179942
Cohort2			0	15	30	60	120
	WT	1	154	274	242	135	122
		2	96	176	147	111	109
		3	121	252	180	132	127
		4	107	189	190	129	115
		5	135	260	231	184	144
		6	122	193	169	134	111
		7	136	222	195	133	137
		8	127	241	203	108	113
		9	147	203	177	132	120
		AVG	127.222	223.333	192.667	133.111	122
		STD	18.356	35	29.7363	21.6012	12.0312
		SEM	6.11868	11.6667	9.91211	7.20039	4.0104
			0	15	30	60	120
	KO	1	118	236	206	148	111
		2	133	231	170	121	98
		3	125	175	165	110	106
		4	96	222	189	132	113
		5	98	190	144	107	102
		6	137	235	205	126	122
		7	107	228	221	137	117
		8	105	222	132	90	99
		AVG	114.875	217.375	179	121.375	108.5
		STD	15.7248	22.5004	31.5776	18.5468	8.7014
		SEM	5.55954	7.95509	11.1644	6.55727	3.07641
		p-value	0.159777	0.686796	0.372708	0.251128	0.0193526

## Sheet: 2C
Cohort1			0	15	30	60	120	min
	WT	1	196	147	90	88	113
		2	204	190	129	147	136
		3	177	179	103	88	98
		4	175	133	102	88	128
		5	142	121	86	89	125
		6	142	192	176	214	189
		7	152	113	135	166	121
		8	161	146	82	67	99
		AVG	168.625	152.625	112.875	118.375	126.125
		STD	23.4943	30.8773	31.9573	51.4113	28.7374
		SEM	8.30649	10.9168	11.2986	18.1767	10.1602
			0	15	30	60	120	min
	KO	1	183	122	102	72	116
		2	186	127	110	90	99
		3	172	90	88	84	111
		4	190	110	91	104	110
		5	190	132	124	80	64
		6	167	127	104	118	132
		7	165	117	115	130	116
		8	152	135	119	121	132
		AVG	175.625	120	106.625	99.875	110
		STD	13.8041	14.5406	12.8501	21.4505	21.6399
		SEM	4.88049	5.14087	4.5432	7.58391	7.65086
		p-value	0.479455	0.0171312	0.615794	0.363497	0.225544
Cohort2			0	15	30	60	90	120	min
	WT	1	292	220	137	81	97	113
		2	154	103	85	50	62	79
		3	223	182	123	101	213	205
		4	148	97	94	74	88	101
		5	215	179	137	98	256	305
		6	216	140	121	147	142	184
		7	196	155	87	56	72	81
		8	188	111	71	71	90	102
		9	220	157	99	87	65	84
		AVG	205.778	149.333	106	85	120.556	139.333
		STD	42.652	41.0396	24.1247	28.8791	69.617	76.9854
		SEM	14.2173	13.6799	8.04156	9.62635	23.2057	25.6618
			0	15	30	60	90	120	min
	KO	1	199	153	90	84	76	92
		2	242	160	81	49	51	72
		3	230	168	89	70	78	105
		4	222	167	92	81	138	172
		5	205	182	134	109	177	171
		6	205	132	95	76	95	121
		7	150	87	78	53	84	119
		8	184	109	98	80	158	162
		AVG	204.625	144.75	94.625	75.25	107.125	126.75
		STD	28.7449	32.7316	17.2539	18.8358	44.8376	37.8333
		SEM	10.1628	11.5724	6.10017	6.65945	15.8525	13.3761
		p-value	0.949479	0.804271	0.286836	0.429391	0.648141	0.681509

## Sheet: 2D
			Insulin	AVG	STD	SEM	p-value				Insulin	AVG	STD	SEM	p-value
Fed Insulin	WT	1	1.232	1.21063	0.224474	0.0793635		Fasted Insulin	WT	1	0.199	0.286625	0.0767704	0.0271424					AVG	STD	SEM	p-value
		2	1.111							2	0.434						Fed	WT	1.21063	0.224474	0.079
		3	1.543							3	0.265							KO	0.992286	0.273783	0.103	0.113299
		4	0.878							4	0.232
		5	1.15							5	0.258
		6	0.989							6	0.234						Fasted	WT	0.286625	0.0767704	0.027
		7	1.35							7	0.331							KO	0.291571	0.089394	0.033	0.909909
		8	1.432							8	0.34
	KO	1	1.127	0.992286	0.273783	0.10348	0.113299		KO	1	0.411	0.291571	0.089394	0.0337878	0.909909
		2	1.555							2	0.245
		3	0.889							3	0.233
		4	0.934							4	0.211
		5	0.852							5	0.198
		6	0.756							6	0.366
		7	0.833							7	0.377
