# Supplementary material for: Dnmt3a is an epigenetic mediator of adipose insulin resistance
Source: eLife. 2017 Nov 1;6:e30766. doi: 10.7554/eLife.30766 (PMC5730374; doi:10.7554/eLife.30766)
Supplement: Figure 4—figure supplement 3—source data 1. [file elife-30766-fig4-figsupp3-data1.xlsx]

## Sheet: 3A
	Cohort2 (Female)
			8wks	20wk
	WT	1	16.86	35
		2	16.73	41.95
		3	16.25	37.79
		4	16.17	32
		5	16.24	36.88
		6	16.92	32.83
		AVG	16.5283	36.075
		STD	0.344408	3.64407
		SEM	0.140604	1.48768
			8wks	20wk
	KO	1	15.26	36.44
		2	18.15	34.99
		3	18.5	23.96
		4	16.36	33.59
		5	16.79	38.9
		6	16.87	36.54
		AVG	16.9883	34.07
		STD	1.18911	5.25995
		SEM	0.485451	2.14737
		p-value	0.384149	0.460518

## Sheet: 3B
Cohort2 (female)	Genotype	Animals	0	15	30	60	90	120
	WT	1	235	209	192	170	222	245
	WT	2	281	219	192	102	166	237
	WT	3	313	393	263	281	312	338
	WT	4	248	166	139	103	117	205
	WT	5	234	173	130	128	138	198
	WT	6	242	211	153	171	172	255
		AVG	258.833	228.5	178.167	159.167	187.833	246.333
		STD	31.657	83.4548	49.126	67.0743	70.4455	50.2222
		SEM	22.3849	59.0114	34.7373	47.4287	49.8125	35.5124
	Genotype	Animals	0	15	30	60	90	120
	KO	1	223	136	111	134	152	176
	KO	2	236	135	120	123	139	144
	KO	3	179	149	106	81	104	138
	KO	4	231	210	134	149	176	235
	KO	5	203	131	99	116	113	180
	KO	6	248	179	155	127	131	198
		AVG	220	156.667	120.833	121.667	135.833	178.5
		STD	25.0599	31.4876	20.6632	22.8707	26.2406	35.8092
		SEM	17.72	22.2651	14.6111	16.172	18.5549	25.3209
		P-value	0.0402309	0.0768057	0.0249426	0.224026	0.121056	0.0225519

## Sheet: 3C
	Cohort2 (female)	Genotype	Animals	0	15	30	60	120
		WT	1	165	546	530	553	485
		WT	2	179	435	423	559	442
		WT	3	169	588	600	473	309
		WT	4	146	600	600	454	335
		WT	5	168	488	572	527	428
		WT	6	144	395	461	443	333
			AVG	161.833	508.667	531	501.5	388.667
			STD	13.8768	83.4306	74.5225	51.185	72.1073
			SEM	9.81241	58.9944	52.6954	36.1932	50.9876
		Genotype	Animals	0	15	30	60	120
		KO	1	132	443	476	462	307
		KO	2	157	426	532	460	316
		KO	3	116	491	474	383	220
		KO	4	108	414	482	401	424
		KO	5	86	357	409	456	208
		KO	6	178	461	504	388	215
			AVG	129.5	432	479.5	425	281.667
			STD	33.6199	45.6684	40.928	38.1156	84.5616
			SEM	23.7729	32.2924	28.9405	26.9518	59.7941
			P-value	0.0544706	0.0765752	0.168702	0.0148802	0.0400602
