# Supplementary material for: Dnmt3a is an epigenetic mediator of adipose insulin resistance
Source: eLife. 2017 Nov 1;6:e30766. doi: 10.7554/eLife.30766 (PMC5730374; doi:10.7554/eLife.30766)
Supplement: Figure 4—figure supplement 4—source data 1. [file elife-30766-fig4-figsupp4-data1.xlsx]

## Sheet: 4
			cyclophilin	pparg	24.5233	AVG	STD	SEM	p-value					cyclophilin	pparg	32.3018	AVG	STD	SEM	p-value
iWAT	WT	1	24.9338	24.8436	0.800909	1.04113	0.321295	0.131168	0.610138		BAT	WT	1	29.8972	31.8918	1.32863	1.14827	0.627787	0.280755	0.744285
		2	24.2186	24.298	1.16901								2	29.7774	33.3546	0.482034
		3	24.1997	24.9425	0.747821								3	28.3126	31.8719	1.34708
		4	24.0397	24.9803	0.728489								4	29.2033	31.2976	2.00572
		5	23.6861	24.0237	1.41384								5	28.002	33.0929	0.577903
		6	24.8458	24.0517	1.38668
	KO	1	24.1896	24.3948	1.09314	1.13876	0.32131	0.131174				KO	1	30.0908	32.1107	1.14159	0.997106	0.779631	0.348662
		2	24.0767	24.5704	0.967898								2	28.9282	31.7902	1.42562
		3	23.5811	24.1312	1.31228								3	29.7757	33.5104	0.432663
		4	24.3528	25.1379	0.653108								4	33.3195	38.2623	0.0160582
		5	28.387	23.8433	1.60211								5	28.7449	31.3239	1.9696
		6	27.0568	24.2554	1.20402
			cyclophilin	Fabp4	15.7407									cyclophilin	Fabp4	25.1248
iWAT	WT	1	24.9338	14.0196	3.2969	1.21649	1.02894	0.420061	0.539758		BAT	WT	1	29.8972	24.8834	1.18209	1.35832	1.28812	0.576065	0.41925
		2	24.2186	16.4405	0.615635								2	29.7774	25.0228	1.07327
		3	24.1997	15.9157	0.885774								3	28.3126	26.4676	0.394264
		4	24.0397	15.7403	1.00028								4	29.2033	25.967	0.557779
		5	23.6861	16.322	0.668347								5	28.002	23.2832	3.58418
		6	24.8458	16.006	0.831998
	KO	1	24.1896	16.3108	0.673572	0.941542	0.258037	0.105343				KO	1	30.0908	26.2152	0.469631	0.804214	0.676798	0.302673
		2	24.0767	15.5984	1.10362								2	28.9282	25.2155	0.939032
		3	23.5811	15.5539	1.13825								3	29.7757	25.4837	0.77976
		4	24.3528	16.4784	0.599705								4	33.3195	35.4097	0.000801559
		5	28.387	15.8728	0.912477								5	28.7449	24.2515	1.83185
		6	27.0568	15.4519	1.22162
			cyclophilin	pgc1a	30.5993									cyclophilin	pgc1a	28.4191
iWAT	WT	1	24.9338	30.1589	1.35695	1.04372	0.32264	0.131717	0.61349		BAT	WT	1	29.8972	27.5658	1.8066	1.33471	1.04073	0.465429	0.428027
		2	24.2186	30.9546	0.781702								2	29.7774	29.3233	0.53432
		3	24.1997	30.8079	0.865371								3	28.3126	28.2379	1.13384
		4	24.0397	30.1228	1.39133								4	29.2033	26.8922	2.88171
		5	23.6861	31.2518	0.636184								5	28.002	30.0763	0.317054
		6	24.8458	30.2997	1.23078
	KO	1	24.1896	31.0144	0.749934	1.16524	0.471091	0.192322				KO	1	30.0908	27.357	2.08802	1.88966	0.901384	0.403111
		2	24.0767	31.8381	0.423701								2	28.9282	27.0986	2.49759
		3	23.5811	30.1721	1.34456								3	29.7757	29.2463	0.563608
		4	24.3528	30.1811	1.33622								4	33.3195
		5	28.387	29.9662	1.55089								5	28.7449	27.1504	2.40941
		6	27.0568	29.9338	1.58614
			cyclophilin	Cidea	28.9603									cyclophilin	Cidea	36.0341
iWAT	WT	1	24.9338	29.7429	0.581317	1.31732	1.16991	0.477613	0.28422		BAT	WT	1	29.8972	35.1596	1.83341	1.26245	0.748109	0.334565	0.052686
		2	24.2186	30.43	0.36107								2	29.7774	38.0287	0.250943
		3	24.1997	28.3887	1.48616								3	28.3126	36.5102	0.718913
		4	24.0397	28.8873	1.05189								4	29.2033	35.4299	1.52013
		5	23.6861	27.1245	3.56975								5	28.002	35.0421	1.98888
		6	24.8458	29.1885	0.853731
	KO	1	24.1896	29.6683	0.61218	0.761001	0.285537	0.11657				KO	1	30.0908	32.6952	10.1181	5.1162	3.66739	1.64011
		2	24.0767	28.8077	1.11159								2	28.9282	33.6876	5.08581
		3	23.5811	29.8484	0.540334								3	29.7757	35.5368	1.41157
		4	24.3528	28.9008	1.0421								4	33.3195
		5	28.387	30.2617	0.405725								5	28.7449	34.0895	3.84932
		6	27.0568	29.1879	0.854076
			cyclophilin	Elovl3	31.2135									cyclophilin	Elovl3	28.9796
iWAT	WT	1	24.9338	30.5951	1.53512	1.02266	0.259412	0.105905	0.0990214		BAT	WT	1	29.8972	28.2295	1.6819	1.20234	0.833209	0.372622	0.27967
		2	24.2186	31.1893	1.01692								2	29.7774	29.543	0.676679
		3	24.1997	31.3329	0.92058								3	28.3126	29.8974	0.529311
		4	24.0397	31.48	0.831319								4	29.2033	29.5381	0.678982
		5	23.6861	31.271	0.960938								5	28.002	27.6898	2.44483
		6	24.8458	31.4127	0.871053
	KO	1	24.1896	30.7678	1.36195	1.58222	0.70768	0.288909				KO	1	30.0908	31.9544	0.127198	0.573612	0.753313	0.336892
		2	24.0767	29.7569	2.7445								2	28.9282	30.6563	0.31279
		3	23.5811	31.6425	0.742793								3	29.7757	31.6463	0.157478
		4	24.3528	31.1353	1.05568								4	33.3195
		5	28.387	30.2706	1.92243								5	28.7449	28.2166	1.69698
		6	27.0568	30.4771	1.66595
			cyclophilin	Ucp1	32.7273									cyclophilin	Ucp1	25.2209
iWAT	WT	1	24.9338	32.5483	1.13204	1.07057	0.405128	0.165393	0.0464062		BAT	WT	1	29.8972	24.0215	2.29645	1.27894	0.897173	0.401228	0.191528
		2	24.2186	32.035	1.61582								2	29.7774	25.1793	1.02924
		3	24.1997	32.5281	1.14807								3	28.3126	26.7925	0.336432
		4	24.0397	32.3157	1.33012								4	29.2033	25.9925	0.585781
		5	23.6861	33.518	0.578056								5	28.002	24.1187	2.14682
		6	24.8458	33.4185	0.619321
	KO	1	24.1896	33.6304	0.534731	0.613654	0.280216	0.114398				KO	1	30.0908	26.3388	0.460751	0.623989	0.498921	0.223124
		2	24.0767	34.4199	0.309355								2	28.9282	25.8148	0.662549
		3	23.5811	32.8707	0.905341								3	29.7757	25.9594	0.599373
		4	24.3528	33.0955	0.774715								4	33.3195	32.3127	0.00733111
		5	28.387	34.5709	0.278608								5	28.7449	24.7459	1.38994
		6	27.0568	32.913	0.879172
