# Supplementary material for: Dnmt3a is an epigenetic mediator of adipose insulin resistance
Source: eLife. 2017 Nov 1;6:e30766. doi: 10.7554/eLife.30766 (PMC5730374; doi:10.7554/eLife.30766)
Supplement: Figure 4—figure supplement 5—source data 1. [file elife-30766-fig4-figsupp5-data1.xlsx]

## Sheet: 5
			cyclophilin	TNFa		6.19073	Fold	AVG Fold	STD	SEM	p-value
	WT	1	20.3702	26.0303	5.66007	1.44459	1.77526	1.10058	0.47756	0.194963	0.261093
			20.7795	25.8958	5.11627	2.10593
		2	20.4484	26.1929	5.7445	1.36248	1.61435
			20.4449	25.7355	5.29061	1.86622
		3	21.4005	27.5885	6.18801	1.00189	1.00743
			21.5013	27.6735	6.17213	1.01297
		4	20.5414	27.7536	7.21222	0.492606	0.712475
			20.4765	26.7683	6.29179	0.932345
		5	20.945	27.0994	6.15447	1.02545	0.82384
			20.5362	27.4114	6.87521	0.622229
		6	20.8743	27.9274	7.05301	0.550082	0.670138
			20.7356	27.2661	6.53045	0.790195
	KO	1	20.3434	27.6214	7.27801	0.470648	0.711922	0.762905	0.5041	0.205798
			20.0215	26.2814	6.25989	0.953196
		2	20.3716	27.3021	6.93051	0.598829	0.51551
			20.5407	27.9417	7.40098	0.432192
		3	20.0795	26.0156	5.93607	1.19305	0.678196
			20.5682	29.373	8.80481	0.163336
		4	21.3269	28.5925	7.26555	0.47473	0.474393
			21.3259	28.5935	7.2676	0.474056
		5	20.5715	28.0825	7.51103	0.400452	0.431305
			20.7539	28.0582	7.30427	0.462159
		6	20.983	26.5792	5.59623	1.50995	1.7661
			21.5908	26.7656	5.17476	2.02226
			cyclophilin	Ccl2		6.38032
	WT	1	20.3702	27.307	6.9368	0.679958	0.812117	1.13148	0.534723	0.2183	0.102678
			20.7795	27.2426	6.46304	0.944275
		2	20.4484	26.0527	5.60435	1.71234	1.74578
			20.4449	25.994	5.54908	1.77921
		3	21.4005	29.0069	7.60645	0.427461	0.52443
			21.5013	28.568	7.06672	0.6214
		4	20.5414	25.5255	4.98409	2.63213	1.80767
			20.4765	26.8813	6.40476	0.983204
		5	20.945	26.9637	6.01875	1.28482	1.12013
			20.5362	26.9822	6.44608	0.955438
		6	20.8743	27.5696	6.69524	0.803895	0.778746
			20.7356	27.5241	6.78845	0.753596
	KO	1	20.3434	27.5599	7.21657	0.560097	0.498467	0.670934	0.329382	0.13447
			20.0215	27.5967	7.57515	0.436837
		2	20.3716	27.9346	7.56298	0.440537	0.656069
			20.5407	27.1193	6.57858	0.871601
		3	20.0795	27.832	7.75244	0.386323	0.633738
			20.5682	27.131	6.56285	0.881153
		4	21.3269	27.9744	6.64743	0.830979	1.3068
			21.3259	26.8722	5.54632	1.78262
		5	20.5715	28.9745	8.40302	0.246096	0.35993
			20.7539	28.212	7.45808	0.473765
		6	20.983	29.1344	8.1514	0.292988	0.570599
			21.5908	28.2087	6.61783	0.848209
			cyclophilin	F4/80		5.98903
	WT	1	20.3702	27.1057	6.73548	0.59607	0.727937	1.1016	0.456046	0.18618	0.30803
			20.7795	26.9865	6.20695	0.859805
		2	20.4484	26.3547	5.90637	1.05897	1.07044
			20.4449	26.3204	5.87546	1.0819
		3	21.4005	27.9368	6.53639	0.684274	0.734789
			21.5013	27.839	6.33771	0.785303
		4	20.5414	25.5744	5.03303	1.93992	1.95797
			20.4765	25.4829	5.00643	1.97602
		5	20.945	26.3614	5.41643	1.4872	1.17712
			20.5362	26.731	6.19487	0.867037
		6	20.8743	28.027	7.15264	0.446395	0.941374
			20.7356	26.2023	5.46662	1.43635
	KO	1	20.3434	26.6513	6.30791	0.801691	0.646372	0.831206	0.415093	0.169461
			20.0215	27.0366	7.01508	0.491053
		2	20.3716	27.5512	7.17959	0.438134	0.419837
			20.5407	27.8462	7.30542	0.40154
		3	20.0795	25.7866	5.70708	1.21583	1.54475
			20.5682	25.6513	5.08316	1.87367
		4	21.3269	27.2045	5.87751	1.08037	1.09995
			21.3259	27.152	5.82613	1.11954
		5	20.5715	27.395	6.82351	0.560787	0.604848
			20.7539	27.3668	6.61294	0.648908
		6	20.983	27.0914	6.10841	0.920586	0.671477
			21.5908	28.8233	7.23246	0.422368
			cyclophilin	IL6		8.15086
	WT	1	20.3702	28.5483	8.17814	0.981272	1.42069	1.06254	0.247579	0.101074	0.747673
			20.7795	28.035	7.25547	1.86011
		2	20.4484	28.5281	8.07967	1.05058	1.13241
			20.4449	28.3157	7.87081	1.21424
		3	21.4005	29.518	8.11751	1.02338	1.09961
			21.5013	29.4185	7.91718	1.17584
		4	20.5414	28.6304	8.089	1.04381	1.09923
			20.4765	28.4199	7.94342	1.15464
		5	20.945	28.8707	7.92576	1.16886	0.961131
			20.5362	29.0955	8.55937	0.753403
		6	20.8743	30.5709	9.69661	0.342519	0.662142
			20.7356	28.913	8.17741	0.981766
	KO	1	20.3434	28.8436	8.50022	0.784936	0.850768	1.1349	0.475372	0.19407
			20.0215	28.298	8.2765	0.9166
		2	20.3716	28.9425	8.57094	0.747382	0.783003
			20.5407	28.9803	8.43959	0.818624
		3	20.0795	28.0237	7.94415	1.15406	1.37111
			20.5682	28.0517	7.4835	1.58817
		4	21.3269	28.3948	7.06788	2.11841	1.99637
			21.3259	28.5704	7.24448	1.87434
		5	20.5715	29.1312	8.55973	0.753216	0.801992
			20.7539	29.1379	8.38403	0.850767
		6	20.983	29.8433	8.86034	0.611541	1.00617
			21.5908	29.2554	7.6646	1.40081
