# Supplementary material for: Dnmt3a is an epigenetic mediator of adipose insulin resistance
Source: eLife. 2017 Nov 1;6:e30766. doi: 10.7554/eLife.30766 (PMC5730374; doi:10.7554/eLife.30766)
Supplement: Figure 4—source data 1. [file elife-30766-fig4-data1.xlsx]

## Sheet: Fig4A
Cohort1		Wks on HFD
WT		1	2	3	4	5	6	7	8	9	10	11	12
	1	23.85	24.55	25.67	27.43	30.44	31.78	33.01	35.11	36.37	38.32	39.08	40.62
	2	24.57	26.04	26.88	27.56	30.3	31.07	32.76	34.42	36.44	38.13	39.05	42.56
	3	26.22	27.48	28.43	31.67	33.11	34.23	35.69	37.88	39.8	41.2	41.76	42.7
	4	21.42	23.71	24.83	25.43	27.39	29.12	33.08	37.77	38.36	41.27	42.98	45
	5	25.87	26.33	28.32	30.56	31.2	32.56	35.52	38.12	40.32	41.32	43	44.88
	6	26.93	28	29.05	31.5	33.45	35.62	38.33	40.14	42.11	44.95	45.72	46.39
	7	26.54	27.35	29.22	31.57	32.3	33.37	35.53	37	38.98	40.13	40.55	42.92
exclude	8	22.3	23.01	23.76	24.77	25.6	25.9	27.4	28.6	30.13	32.43	33.5	35.4
	9	24.5	24.6	24.9	25.32	26.11	27.88	28.54	29.5	29.56	30.54	31.32	32.43
	AVG	25.0571	26.2086	27.4857	29.3886	31.17	32.5357	34.8457	37.2057	38.9114	40.76	41.7343	43.5814
	STD	1.94262	1.58984	1.72042	2.53784	2.07437	2.13957	2.02541	1.93277	2.07686	2.29459	2.40463	1.94141
KO		25.035	26.103	27.417	29.385	31.279	32.591	34.905	37.302	38.944	40.06	41.382	43.6442
		2.057	1.86157	1.83307	2.16781	2.10128	2.03877	2.4334	1.91223	1.89796	2.41946	2.46736	2.21082
	1	23.43	25.32	25.3	26.13	27.77	28.35	34.8	37.2	38.76	40.11	41.67	43.1
	2	23.6	24.13	25.39	27.83	28.01	32.33	33.5	35.12	36.32	38.45	38.9	42
	3	24.7	23.78	25.2	26.9	27.46	28.05	32.82	35.95	37.55	36.28	38.89	40.55
	4	24.43	26.31	28.44	30.27	32.3	33.76	35.41	38.1	40.39	41.22	42.26	44.13
	5	26	26.77	28	28.11	32.9	33.09	33.78	34.52	36.52	38.9	40.77	43.22
	6	26.1	25.32	26.12	28	28.52	29.02	33.99	36.3	39.2	41.43	43.5	45.87
	7	23.53	25.3	26.43	27.85	27.5	30.39	32.06	35	36.3	38.87	40.22	42.25
	8	23.59	25	25.2	26.31	27.32	29.33	32.11	35.11	37	38.09	40	43.9
	9	23.11	24.11	25.33	26.01	28.55	30.22	30.5	31.14	33.69	35.05	37.6	39.8
	AVG	24.2767	25.1156	26.4083	27.8733	29.4933	30.5044	33.2189	36.1983	38.1233	39.3983	40.9983	43.145
	STD	1.12149	1.00381	1.44704	1.40032	2.43864	2.09043	1.51713	1.31691	1.60335	1.94032	1.8548	1.81376
	P-value	0.32812	0.114362	0.0945689	0.0733919	0.0531099	0.077003	0.0868509	0.084852	0.135859	0.0843851	0.237001	0.402958
Cohort3		Wks on HFD
		1	2	3	4	5	6	7	8	9	10	11	12
WT	1	27.12	28.2	31.19	34.47	39.67	N/A	42.46	43.12	44.1	46.4	46.21	48.41
	2	25.14	26.44	27.1	28.92	33.05	N/A	35.4	37.65	39.65	42.13	44.35	45.65
	3	22.01	23.95	26.39	27.88	37.05	N/A	40.05	42.12	45.69	47.65	48.2	50
	4	24.89	26.21	28.26	31.38	32.06	N/A	36.44	37.89	39.12	42.32	44.82	45.52
	5	25.46	27.16	27.26	31.39	31.53	N/A	34.83	36.1	37.56	39.67	42.39	44.96
	6	24.88	25.3	26.74	28.9	30.67	N/A	33.25	35.12	38.2	40.9	42.56	44.23
	7	26.34	27.13	27.1	29.11	31.23	N/A	35.68	37.8	39	42.11	44.25	46.97
	8	24.12	25.42	26.74	28.35	30.21	N/A	34.87	36.32	38.21	39.64	42.3	44.13
	9	25.3	25.9	27	28.2	30.28	N/A	34.21	36.77	38.5	41.28	43.71	45.7
	AVG	25.0289	26.19	27.5311	29.8444	32.8611		36.3544	38.0989	40.0033	42.4556	44.31	46.1744
	STD	1.42937	1.2457	1.46628	2.15711	3.30736		2.9806	2.72752	2.86641	2.79	1.94153	1.9567
KO	1	24.23	25.8	27.61	27.69	29.59	N/A	34.65	35.68	37.13	38.49	40.92	43.28
	2	24.52	26	28.16	29.61	33.9	N/A	36.8	38.46	40.16	43.65	46.8	48.9
	3	25.46	27.03	28.14	31.23	34.66	N/A	37.6	39.32	42.32	45.57	47	49.13
	4	24.12	26.3	28.18	30.07	32.79	N/A	36.86	39.46	40.01	42.13	43.22	45.85
	5	21.65	23.97	28.08	31.39	35.5	N/A	38.67	40.12	43.32	44.98	44	46.25
	6	25.26	26.9	28.33	30.22	31.23	N/A	40.21	41.3	43.22	45.1	46.2	48
	7	25	26.54	27.93	28.3	30.5	N/A	34.34	36.9	37.56	38.43	39.42	42.9
	8	25.4	26.92	28.11	29.83	31.86	N/A	35	36.74	38.92	40.11	42.31	44.22
	9	22.1	24.88	25.6	27.4	29.63	N/A	33.89	35.22	38.13	39.4	40.32	43.11
	AVG	24.1933	26.0378	27.7933	29.5267	32.5957		36.4467	38.1333	40.0856	41.9844	43.3544	45.7378
	STD	1.40592	1.03086	0.846877	1.44261	2.22585		2.15137	2.09817	2.38712	2.94469	2.85917	2.50504
	P-value	0.229183	0.781235	0.64849	0.718159	0.614653		0.940937	0.976416	0.948097	0.732074	0.419049	0.685718

## Sheet: Fig4B
		WT				KO
	Animal	fat mass	lean mass		Animal	fat mass	lean mass
	1	13.92	24.76		1	13.23	23.43
	2	14.3	23.87		2	13.54	23.83
	3	11.35	25.34		3	14.78	23.35
	4	14.34	23.56		4	11.85	24.53
	5	11.54	25.22		5	11.54	24.26
	6	11.34	25.7		6	13.77	22.48
	7	14.53	23.79		7	14.09	22.45
					8	13.22	24.05
					9	11.72	24.92
	AVG	13.0457	24.6057			12.9957	23.72
	STD	1.54207	0.860036			1.13875	0.857074
	SEM	1.09041	0.608137			0.805216	0.606042
						0.957226	0.0549574

## Sheet: Fig4C
	Animal	BW	FAT mass	Lean mass			Animal	BW	FAT mass	Lean mass
f/f						KO
before fasting	1	32.99	5.85	26.1		before fasting	1	33.13	10.61	21.31
	2	33.26	8.39	24.28			2	36.43	12.21	23.07
	3	41.17	14.83	26.19			3	43.62	14.9	27.05
	4	41.1	17.54	23.28			4	35.43	10.45	24.06
	5	40.25	14.07	25.78			5	37.82	10.02	26.16
	6	35.83	9.42	25.27			6	42.48	16.95	24.52
	7	39.12	14.99	23.65			7	37.89	15.86	21.31
	8	46.27	19.53	26.77			8	40.44	17.55	22.11
	9	43.71	18.05	24.93			9	32.42	5.5	24.75
	10	37.1	12.06	24.28			10	45.52	17.34	26.39
	11	38.52	16.31	21.43			11	42.39	17.02	24.41
	12	34.25	7.56	26.37			12	33.73	10.03	22.58
	13	40.25	17.53	22.49			13	43.4	16.19	25.2
	14	39.3	13.99	24.87			14	33.38	10.56	21.82
	AVG	38.7943	13.58	24.6921			AVG	38.4343	13.2279	23.91
	STD	3.8462	4.30228	1.56586			STD	4.5021	3.77526	1.91531
	SEM	2.71967	3.04217	1.10723			SEM	3.18346	2.66951	1.35433
							p-value	0.821828	0.819741	0.247537
	16hr fasting	30.43		4.99	24.5	29.73		31.27	9.78	20.21
		31		7.49	23.24	30.3		34.17	11.2	21.72
		38.41		13.61	24.97	37.71		40	13.58	25.8
		38.73		16.43	21.98	38.03		33.51	9.57	22.74
		37.89		12.88	24.48	37.19		34.62	8.92	24.25
		33.06		8.41	24.14	32.36		40.02	15.96	22.85
		36.94		13.89	22.33	36.24		36.45	15.29	20.02
		44.01		18.48	25.27	43.31		38.83	16.95	20.97
		40.58		17.02	23.02	39.88		29.59	4.69	23.33
		34.52		11.11	22.66	33.82		41.61	16.09	24.3
		36.05		15.45	20.04	35.35		39.84	15.83	22.73
		32.13		7.31	23.98	31.43		31.41	9.03	21.33
		38.1		16.32	21.45	37.4		41.76	15.77	23.44
		37.2		12.49	24.2	36.5		31.38	9.62	20.91
	AVG	36.3607		12.5629	23.3043		AVG	36.0329	12.3057	22.4714
	STD	3.81011		4.16284	1.48596		STD	4.27046	3.78953	1.69223
	SEM	2.69415		2.94358	1.05073		SEM	3.01967	2.6796	1.19659
							p-value	0.831948	0.865614	0.178201
	per cent	0.922401	0.852991	0.938697				0.943858	0.921772	0.948381
		0.932051	0.892729	0.957166				0.937963	0.917281	0.941482
		0.932961	0.917734	0.953417				0.917011	0.911409	0.953789
		0.942336	0.936716	0.944158				0.945809	0.915789	0.945137
		0.941366	0.915423	0.949573				0.915389	0.89022	0.926988
		0.92269	0.892781	0.955283				0.94209	0.941593	0.931892
		0.944274	0.926618	0.944186				0.961995	0.964061	0.939465
		0.951156	0.946237	0.943967				0.960188	0.965812	0.94844
		0.928392	0.942936	0.923385				0.912708	0.852727	0.942626
		0.930458	0.921227	0.933278				0.914104	0.927912	0.920803
		0.935877	0.947272	0.935138				0.939844	0.930082	0.931176
		0.938102	0.966931	0.909367				0.931218	0.900299	0.944641
		0.946584	0.930975	0.953757				0.962212	0.974058	0.930159
	per cent loss	7.75993	14.7009	6.13027				5.61425	7.82281	5.1619
		6.79495	10.7271	4.28336				6.20368	8.27191	5.85176
		6.70391	8.22657	4.65827				8.29895	8.85906	4.62107
		5.76642	6.32839	5.58419				5.41914	8.42105	5.48628
		5.86335	8.45771	5.04267				8.46113	10.978	7.30122
		7.73095	10.7219	4.47171				5.79096	5.84071	6.81077
		5.5726	7.33823	5.5814				3.80048	3.59395	6.0535
		4.88437	5.37634	5.60329				3.98121	3.4188	5.15604
		7.16083	5.70637	7.66145				8.72918	14.7273	5.73737
		6.95418	7.87728	6.67216				8.58963	7.20877	7.91967
		6.41225	5.27284	6.48623				6.01557	6.99177	6.88243
		6.18978	3.30688	9.06333				6.87815	9.97009	5.53587
		5.34161	6.90245	4.62428				3.7788	2.59419	6.98413
	AVG	6.39501	7.76483	5.83558			AVG	6.27393	7.59219	6.11554
	STD	0.893984	2.96293	1.38129			STD	1.81914	3.32658	0.978883
	SEM	0.632142	2.09511	0.97672			SEM	1.28633	2.35224	0.692175
							p-value	0.831292	0.890036	0.55661
			WT				KO
		per cent loss	BW	Fat mass	Lean mass		BW	Fat mass	Lean mass
		AVG	6.39501	7.76483	5.83558		6.27393	7.59219	6.11554
		STD	0.893984	2.96293	1.38129		1.81914	3.32658	0.978883
		SEM	0.632142	2.09511	0.97672		1.28633	2.35224	0.692175
		p-value					0.831292	0.890036	0.55661

## Sheet: Fig4D, 4E
	Cohort1 (male)
	GTT1	Genotype	Animals	0	15	30	60	120
		WT	1	167	306	352	333	221
		WT	2	141	355	410	352	173
		WT	3	165	402	431	437	181
		WT	4	155	455	406	376	213
		WT	5	131	449	417	302	180
		WT	6	160	405	416	334	199		Cohort1 (male)
		WT	7	138	335	377	277	205
										AUC
			AVG	151	386.714	401.286	344.429	196		WT	1185	1274	1443	1421	1324	1335	1161
			STD	14.2478	56.7236	27.2746	51.9771	18.3212		KO	1131	885	1232	939	1147	1108	1121	1169	905
			SEM	10.0747	40.1097	19.2861	36.7534	12.9551
										%AUC	1306.14
										WT	0.907251	0.975391	1.10478	1.08794	1.01367	1.02209	0.888877
		Genotype	Animals	0	15	30	60	120		KO	0.865908	0.677568	0.943235	0.718911	0.878158	0.848299	0.858252	0.895002	0.69288
		KO	1	151	339	333	290	187
		KO	2	93	267	263	238	141		AVG	WT	1
		KO	3	128	406	380	295	174			KO	0.819801
		KO	4	107	282	304	228	143
		KO	5	168	365	356	259	165		STD	WT	0.0826063
		KO	6	159	348	397	213	140			KO	0.0969739
		KO	7	159	362	335	263	163		SEM	WT	0.0685709
		KO	8	155	427	324	279	122			KO	0.0484869
		KO	9	118	301	280	203	124		p-value		0.00152404
			AVG	137.556	344.111	330.222	252	151
			STD	26.7494	53.8062	43.8742	33.3279	22.4165
			SEM	18.9146	38.0468	31.0237	23.5664	15.8509
			P-value	0.250794	0.147082	0.00218047	0.000689645	0.00073192
	Cohort1
	GTT2
		Genotype	Animals	0	15	30	60	120
		WT	1	179	374	545	582	529
		WT	2	193	394	472	421	443
		WT	3	140	399	555	600	569
		WT	4	163	370	478	584	381
		WT	5	159	553	544	600	378
		WT	6	157	302	417	469	535
		WT	7	170	453	477	530	600
			AVG	165.857	406.429	498.286	540.857	490.714
			STD	16.9748	78.6826	51.0742	70.9423	89.9235
			SEM	12.003	55.637	36.1149	50.1638	63.5855
		Genotype	Animals	0	15	30	60	120
		KO	1	192	347	391	306	279
		KO	2	216	426	386	496	494
		KO	3	165	396	486	498	444
		KO	4	125	441	451	550	390
		KO	5	236	401	460	483	367
		KO	6	178	351	461	379	402
		KO	7	177	299	480	464	449
		KO	8	92	457	398	305	166
		KO	9	117	421	435	345	279
			AVG	166.444	393.222	438.667	425.111	363.333
			STD	47.2999	51.3098	38.3536	92.1662	103.865
			SEM	33.4461	36.2815	27.1201	65.1714	73.4439
			P-value	0.975609	0.690583	0.0181861	0.0158612	0.0219914
	Cohort2 (female)	Genotype	Animals	0	15	30	60	120
		WT	1	165	546	530	553	485
		WT	2	179	435	423	559	442
		WT	3	169	588	600	473	309
		WT	4	146	600	600	454	335
		WT	5	168	488	572	527	428
		WT	6	144	395	461	443	333
			AVG	161.833	508.667	531	501.5	388.667
			STD	13.8768	83.4306	74.5225	51.185	72.1073
			SEM	9.81241	58.9944	52.6954	36.1932	50.9876
		Genotype	Animals	0	15	30	60	120
		KO	1	132	443	476	462	307
		KO	2	157	426	532	460	316
		KO	3	116	491	474	383	220
		KO	4	108	414	482	401	424
		KO	5	86	357	409	456	208
		KO	6	178	461	504	388	215
			AVG	129.5	432	479.5	425	281.667
			STD	33.6199	45.6684	40.928	38.1156	84.5616
			SEM	23.7729	32.2924	28.9405	26.9518	59.7941
			P-value	0.0544706	0.0765752	0.168702	0.0148802	0.0400602
	Cohort3 (male)			0	15	30	60	120
		1	WT	188	534	578	463	322
		2	WT	190	476	555	510	436
		3	WT	202	503	473	453	356
		4	WT	168	555	532	502	401
		5	WT	187	488	500	511	412
		6	WT	170	506	562	528	376
		7	WT	189	521	551	493	435
		8	WT	180	538	530	522	467
		9	WT	209	597	600	534	420
			AVG	187	524.222	542.333	501.778	402.778
			STD	13.3323	37.0128	38.8555	27.9454	44.8352
			SEM	9.42735	26.172	27.475	19.7604	31.7033
		1	KO	201	489	442	421	392
		2	KO	186	352	521	508	400
		3	KO	194	386	380	423	415
		4	KO	177	483	452	405	467
		5	KO	170	499	370	532	381
		6	KO	192	433	412	436	427
		7	KO	202	357	369	411	355
		8	KO	213	510	555	522	481
		9	KO	184	463	485	411	362
			AVG	191	441.333	442.889	452.111	408.889
			STD	13.351	61.9899	67.2764	52.5177	43.5702
			SEM	9.4406	43.8335	47.5716	37.1356	30.8088
				0.53377	0.00333426	0.00144546	0.0234549	0.773103

## Sheet: Fig4F, 4G
Cohort1 (male)
ITT1	Genotype	Animals	0	15	30	60	90	120		AUC	1	2	3	4	5	6	7	8	9
	WT	1	256	268	218	180	137	107		WT	984.5	1185	1046	844.5	889.5	796.5	815.5
	WT	2	255	268	221	198	249	243		KO	821.5	828	641.5	772.5	769.5	653	603	722	714
	WT	3	262	257	165	174	194	250
	WT	4	228	203	153	143	154	155		% AUC	937.357
	WT	5	223	254	176	131	125	184		WT	1.05029	1.26419	1.1159	0.900937	0.948945	0.849729	0.869999
	WT	6	202	175	157	149	138	153		KO	0.8764	0.883335	0.684371	0.824126	0.820925	0.696639	0.643298	0.770251	0.761716
	WT	7	269	178	173	129	125	152
										AVG	f/f	1
		AVG	242.143	229	180.429	157.714	160.286	177.714			KO	0.773451
		STD	24.6673	42.1189	27.9037	26.5061	45.7811	52.1463
		SEM	9.32337	15.9194	10.5466	10.0184	17.3036	19.7095		STD	f/f	0.151472
											KO	0.085453
										SEM	f/f	0.057251
	Genotype	Animals									KO	0.0284843
	KO	1	250	229	145	111	132	159		p-value		0.00195635
	KO	2	305	220	130	126	133	133
	KO	3	216	180	132	80	89	105
	KO	4	218	196	137	128	134	137
	KO	5	208	193	158	115	127	145
	KO	6	182	173	146	74	77	184
	KO	7	240	186	101	70	78	96
	KO	8	199	170	117	129	140	133
	KO	9	280	215	117	83	90	138
		AVG	233.111	195.778	131.444	101.778	111.111	136.667
		STD	39.7286	21.2001	17.6005	24.7072	26.7416	26.2059
		SEM	13.2429	7.0667	5.86684	8.23572	8.91385	8.73531
		P-value	0.607397	0.0577382	0.000731998	0.000661067	0.0172841	0.0581006
Cohort1 (male)	Genotype	Animals	0	15	30	60	90	120
ITT2	WT	1	254	352	272	227	261	274
	WT	2	288	278	247	249	256	278
	WT	3	287	185	108	127	165	185
	WT	4	291	244	222	226	235	281
	WT	5	261	240	194	207	285	247
	WT	6	235	197	171	183	257	238
	WT	7	250	250	243	224	228	229
		AVG	233.25	220.125	185.875	187.875	222.125	231.5
		STD	96.445	97.4261	81.3905	63.7774	64.0857	55.1647
		SEM	36.4528	36.8236	30.7627	24.1056	24.2221	20.8503
	Genotype	Animals	0	15	30	60	90	120
	KO	1	240	219	167	164	163	158
	KO	2	224	182	160	122	132	144
	KO	3	304	285	270	187	190	223
	KO	4	239	164	127	126	151	185
	KO	5	358	255	201	252	261	293
	KO	6	283	258	105	159	164	220
	KO	7	224	248	169	150	134	150
	KO	8	211	197	133	124	135	153
	KO	9	235	206	141	116	114	144
		AVG	257.556	223.778	163.667	155.556	160.444	185.556
		STD	48.0549	40.0867	48.7263	43.2496	43.8837	50.8309
		SEM	16.0183	13.3622	16.2421	14.4165	14.6279	16.9436
		P-value	0.654328	0.299257	0.110647	0.0316188	0.00178731	0.0154317
Cohort2 (female)	Genotype	Animals	0	15	30	60	90	120
	WT	1	235	209	192	170	222	245
	WT	2	281	219	192	102	166	237
	WT	3	313	393	263	281	312	338
	WT	4	248	166	139	103	117	205
	WT	5	234	173	130	128	138	198
	WT	6	242	211	153	171	172	255
		AVG	258.833	228.5	178.167	159.167	187.833	246.333
		STD	31.657	83.4548	49.126	67.0743	70.4455	50.2222
		SEM	12.9239	34.0703	20.0556	27.383	28.7592	20.5031
	Genotype	Animals	0	15	30	60	90	120
	KO	1	223	136	111	134	152	176
	KO	2	236	135	120	123	139	144
	KO	3	179	149	106	81	104	138
	KO	4	231	210	134	149	176	235
	KO	5	203	131	99	116	113	180
	KO	6	248	179	155	127	131	198
		AVG	220	156.667	120.833	121.667	135.833	178.5
		STD	25.0599	31.4876	20.6632	22.8707	26.2406	35.8092
		SEM	10.2307	12.8547	8.4357	9.3369	10.7127	14.6191
		P-value	0.0402309	0.0768057	0.0249426	0.224026	0.121056	0.0225519
Cohort3 (male)	Genotype	Animals	0	15	30	60	90
	WT	1	241	193	121	116	188
	WT	2	255	201	140	114	222
	WT	3	246	226	127	89	90
	WT	4	290	214	177	143	223
	WT	5	290	274	216	180	222
	WT	6	254	233	148	134	178
	WT	7	305	230	174	169	180
	WT	8	249	234	145	108	176
	WT	9	303	173	149	114	150
		AVG	270.333	219.778	155.222	129.667	181
		STD	26.1056	29.0507	29.4014	29.7447	42.5029
		SEM	8.70185	9.68357	9.80048	9.91492	14.1676
	Genotype	Animals	0	15	30	60	90
	KO	1	172	110	77	67	90
	KO	2	220	142	110	105	132
	KO	3	235	106	104	64	101
	KO	4	286	116	101	52	89
	KO	5	229	221	178	132	188
	KO	6	191	170	134	84	105
	KO	7	291	222	110	75	105
	KO	8	303	173	149	114	133
	KO	9	268	231	139	100	127
		AVG	243.889	165.667	122.444	88.1111	118.889
		STD	45.9686	50.3264	30.3608	26.3223	30.917
		SEM	15.3229	16.7755	10.1203	8.77409	10.3057
			0.152907	0.0130124	0.0334427	0.00634377	0.00269324

## Sheet: Fig4H
		Cohort1
			WT fed	KO fed				WT fasted	KO fasted
		1	1.97454	1.23888			1	0.507075	0.439081
		2	3.14227	1.35443			2	0.251968	0.354345
		3	3.28747	0.814719			3	0.390561	0.33197
		4	2.11659	1.11289			4	0.136956	0.328357
		5	2.46515	0.864622			5	0.276382	0.386632
		6	1.72603	1.43626			6	0.485522	0.238636
		7	2.45201	1.35434			7	0.485179	0.36317
		8		1.74345			8		0.526341
		9		2.04538			9		0.332754
		AVG	2.45201	1.32944			AVG	0.361949	0.36681
		STD	0.583403	0.306146			STD	0.142814	0.0846934
		SEM	0.220506	0.102049			SEM	0.0539786	0.0282311
		p-value		0.000408065			p-value		0.93226
		Cohort3	WT fed	KO fed
		1	2.54289	1.85699
		2	2.75473	2.06752
		3	3.09688	1.11547
		4	3.24233	1.35376
		5	2.73296	0.940436
		6	2.76492	1.70537
		7	1.56082	1.52471
		8	2.56304	2.65923
		9	3.20537	1.94782
		AVG	2.71822	1.6857
		STD	0.506645	0.525437
		SEM	0.191494	0.175146
		p-value		0.000619267

## Sheet: Fig4J
	WT(basal)		WT(insulin)				KO(basal)		KO(insulin)
	1.726	9.629	67.747	75.352	59.35	93.159	23.006	42.041	126.588	131.369	130.59	117.231	106.512	pIRS
	125.612	105.66	98.673	108.892	85.438	79.677	119.501	98.066	116.435	107.544	83.907	80.563	98.1	IRS
	0.0137407	0.0911319	0.686581	0.691988	0.694656	1.16921	0.192517	0.428701	1.0872	1.22154	1.55637	1.45515	1.08575	pIRS/IRS
AVG	0.0524363		0.810608				0.310609		1.2812
STD	0.0547238		0.23909				0.167007		0.215274
SEM	0.0386956		0.169062				0.118092		0.152221
p-value									0.0171541

## Sheet: Fig 4K
	WT(basal)		WT(insulin)				KO(basal)		KO(insulin)
	24.656	24.627	95.493	126.3	91.99	115.497	28.805	19.705	114.537	132.866	136.516	114.187	142.731	pAkt
	120.807	106.716	122.336	142.905	148.024	155.61	122.629	122.622	109.533	124.813	109.966	126.745	119.631	Akt
	0.204094	0.230771	0.78058	0.883804	0.621453	0.742221	0.234895	0.160697	1.04568	1.06452	1.24144	0.900919	1.19309	pAkt/Akt
AVG	0.217433		0.757014				0.197796		1.08913
STD	0.0188637		0.108361				0.0524662		0.134092
SEM	0.0133386		0.0541807				0.0370992		0.0599678
p-value									0.00517903
