# Supplementary material for: Dnmt3a is an epigenetic mediator of adipose insulin resistance
Source: eLife. 2017 Nov 1;6:e30766. doi: 10.7554/eLife.30766 (PMC5730374; doi:10.7554/eLife.30766)
Supplement: Figure 5—figure supplement 1—source data 1. [file elife-30766-fig5-figsupp1-data1.xlsx]

## Sheet: Sheet1
	Chow	Fgf21 (pg/ml)	AVG	STD	SEM	p-value
WT	1	268	216	60.9131	24.8676
	2	160
	3	310
	4	160
	5	190
	6	208
KO	1	402	239.333	122.492	50.0071	0.684928
	2	250
	3	236
	4	342
	5	122
	6	84
	HFD	Fgf21 (pg/ml)	AVG	STD	SEM	p-value
WT	1	1327	1417.71	146.734	55.4603
	2	1563
	3	1480
	4	1135
	5	1453
	6	1539
	7	1427
KO	1	902	1144.14	202.599	76.5753	0.0442695
	2	1427
	3	1323
	4	1092
	5	1218
	6	1162
	7	885
