# Supplementary material for: Dnmt3a is an epigenetic mediator of adipose insulin resistance
Source: eLife. 2017 Nov 1;6:e30766. doi: 10.7554/eLife.30766 (PMC5730374; doi:10.7554/eLife.30766)
Supplement: Figure 5—source data 1. [file elife-30766-fig5-data1.xlsx]

## Sheet: Fig5C
		cyclophilin	Fgf21			10.3917	AVG	STD	SEM	p-value
GFP	1	17.6081	29.0845	11.4764	10.9613	0.673809	1.06532	0.470305	0.271531
		17.9551	28.4014	10.4463
	2	17.1753	28.3781	11.2028	10.4885	0.93516
		17.7683	27.5425	9.77416
	3	17.7298	27.838	10.1081	9.72544	1.587
		17.9276	27.2703	9.34275
Dnmt3a	1	17.4462	28.7132	11.2671	11.2202	0.563139	0.359451	0.176623	0.101974	0.0387367
		17.2287	28.4021	11.1733
	2	17.4329	31.0273	13.5944	12.3993	0.248696
		18.008	29.2122	11.2042
	3	17.359	29.64	12.281	12.2994	0.266519
		17.7355	30.0533	12.3179
						11.9145
shScr	1	18.7544	29.6529	10.8985	11.509	1.32457	1.04871	0.362809	0.209468
		17.8305	29.9501	12.1196
	2	17.5091	29.1802	11.6711	11.6711	1.18383
		28.4901	30.2633
	3	17.4546	28.7992	11.3447	12.5635	0.637729
		17.4235	31.2059	13.7824
shDnmt3a	1	18.1516	26.0516	7.89996	7.51184	21.1517	21.4106	3.90608	2.25518	0.000260737
		18.1302	25.2539	7.12373
	2	17.5159	25.066	7.55013	7.77373	17.6404
		17.3908	25.3882	7.99734
	3	17.6439	24.7323	7.08842	7.24554	25.4397
		17.7368	25.1395	7.40265
						7.11701
WT	1	23.8111	29.417	5.60588	7.33094	0.862187	1.17632	0.702531	0.405606
		20.7281	29.7841	9.056
	2	22.2124	29.5167	7.30429	7.34327	0.854849
		23.0766	30.4588	7.38225
	3	21.0841	30.6307	9.5466	8.09165	0.508867
		22.5847	29.2214	6.6367
	4	21.6192	28.472	6.85277	5.90502	2.31658
		22.4051	27.3624	4.95727
	5	23.2994	30.0107	6.71135	6.69575	1.3391
		22.4084	29.0886	6.68016
KO	1	22.3968	26.0713	3.67453	4.71906	5.27055	4.25584	1.6472	0.951011	0.00332617
		21.3316	27.0951	5.76359
	2	20.8607	26.0508	5.19011	4.81844	4.9197
		21.9962	26.443	4.44678
	3	21.7996	27.7461	5.94653	6.1322	1.97906
		21.4028	27.7207	6.31787
	4	22.599	27.1377	4.53863	4.53863	5.9727
		22.7969	NaN
	5	21.1153	26.5443	5.42905	5.46754	3.13719
		21.03	26.536	5.50603

## Sheet: Fig5D
Exp1
	Fgf21	Basal	AVG	STD	SEM		Insulin	AVG	STD	SEM	p-value
GFP	0	204	237.5	49.9029	35.2867		1759	1898.17	155.071	109.652
		225					2136
		292					1777
		178					1790
		222					2032
		304					1895
	10	452	342	122.496	86.6176		2043	2255.17	223.886	158.311	0.00931813
		176					2455
		215					1908
		338					2349
		406					2411
		465					2365
	30	221	254.167	85.5252	60.4755		1834	2136.33	329.728	233.153	0.140444
		179					2222
		354					2043
		367					1723
		173					2455
		231					2541
Dnmt3a	0	155	265.667	70.2216	49.6541		1123	1246.83	131.858	93.2378
		275					1423
		376					1067
		269					1248
		254					1321
		265					1299
	10	154	208.333	34.9552	24.7171		1278	1462	111.044	78.5201	0.012099
		204					1589
		183					1480
		236					1560
		245					1432
		228					1433
	30	135	210	51.1977	36.2022		1403	1641.5	133.903	94.6834	0.0004351
		288					1684
		198					1732
		232					1777
		185					1582
		222					1671
Exp2	Fgf21	Basal	AVG	STD	SEM		Insulin	AVG	STD	SEM	p-value
GFP	0	355	254.833	61.219	43.2884		1654	1844.17	141.099	99.7722
		213					1888
		222					2032
		280					1954
		274					1732
		185					1805
	10	231	250.167	93.6748	66.2381		1834	2144.67	225.495	159.449	0.0198836
		197					2005
		255					2222
		170					2043
		432					2450
		216					2314
	30	180	224.167	58.8028	41.5798		2020	2156.5	141.685	100.187	0.00334026
		226					1984
		286					2135
		198					2219
		301					2367
		154					2214
Dnmt3a	0	187	314.833	122.16	86.3799		104	1005.6	68.4675	48.4138
		365					1033
		290					1111
		532					945
		231					952
		284					987
	10	132	174.333	86.7541	61.3444		1352	1441.67	123.856	87.5793	6.37595e-05
		111					1254
		110					1532
		135					1588
		325					1423
		233					1501
	30	154	196.667	67.5031	47.7319		1476	1541	117.171	82.8523	2.14614e-05
		188					1632
		95					1597
		245					1366
		212					1634
		286					163
