# Supplementary material for: Dnmt3a is an epigenetic mediator of adipose insulin resistance
Source: eLife. 2017 Nov 1;6:e30766. doi: 10.7554/eLife.30766 (PMC5730374; doi:10.7554/eLife.30766)
Supplement: Figure 6—source data 1. [file elife-30766-fig6-data1.xlsx]

## Sheet: Fig6B
#1			input	IP		5.18624	Fold enrichment	AVG Fold	STD	SEM	p-value
	GFP	1	22.7775	28.2543	5.47677	0.817604	0.863656	1.11833	0.235087	0.135728			#1		AVG	STD	SEM	p-value
			21.7764	27.0992	5.32277	0.909708								GFP	1.11833	0.235087	0.135728
		2	23.3937	28.5559	5.1622	1.01681	1.32704							Dnmt3a	4.68913	0.373969	0.215911	0.000150945
			22.7898	27.2648	4.47495	1.63727								shScr	1.1315	0.398019	0.229796
		3	22.47	28.894	6.424	0.424031	1.1643							shDnmt3a	0.381151	0.254765	0.147089	0.0513658
			23.2564	27.5132	4.25677	1.90458
	Dnmt3a	1	22.834	25.2665	2.43252	6.74456	5.05545	4.68913	0.373969	0.215911	0.000150945		#2
			21.2882	24.7233	3.43506	3.36634								GFP	1.15929	0.368428	0.212712
		2	21.9184	24.8708	2.95236	4.70398	4.70398							Dnmt3a	4.80827	0.555799	0.32089	0.000691349
			21.1423	12.4553										shScr	1.14811	0.0819202	0.0472966
		3	21.6252	24.6307	3.00551	4.53386	4.30796							shDnmt3a	0.35462	0.295296	0.170489	0.0109492
			21.007	24.1639	3.15695	4.08206							#3
														GFP	1.10511	0.492181	0.284161
						5.37179								Dnmt3a	2.92091	0.160915	0.0929042	0.00371251
	shScr	1	22.9769	27.2707	4.29378	2.11113	1.58779	1.1315	0.398019	0.229796				shScr	1.04029	0.198905	0.114838
			22.3006	27.5823	5.28168	1.06446								shDnmt3a	0.299168	0.19151	0.110568	0.00966834
		2	21.6571	27.1104	5.45327	0.945089	0.85571						#4
			22.1737	27.9295	5.75576	0.76633								GFP	1.12894	0.200207	0.11559
		3	21.3827	26.1796	4.79694	1.48953	0.951012							Dnmt3a	1.85162	0.354452	0.204643	0.0371183
			20.1403	26.7897	6.64934	0.412497								shScr	1.05821	0.340125	0.196371
	shDnmt3a	1	21.3741	28.8436	7.46946	0.233635	0.274985	0.381151	0.254765	0.147089	0.0513658			shDnmt3a	0.404406	0.171184	0.0988329	0.0409824
			22.3024	29.3347	7.03227	0.316334
		2	22.0922	27.8897	5.79747	0.744491	0.67183						distal #1	GFP	1.07059	0.204991	0.118352
			21.2871	27.3979	6.11076	0.599169								Dnmt3a	1.80727	0.320715	0.185165	0.0285087
		3	20.8139	29.2942	8.48034	0.115941	0.196638							shScr	1.05665	0.334529	0.19314
			21.6458	28.8679	7.22209	0.277335								shDnmt3a	0.600989	0.670741	0.387253	0.351762
													distal #2	GFP	1.15664	0.506568	0.292467
#2						7.57109								Dnmt3a	1.52023	0.402575	0.232427	0.385526
	GFP	1	19.0758	26.3639	7.28804	1.21676	1.45224	1.15929	0.368428	0.212712				shScr	1.14743	0.664382	0.383581
			18.7404	25.5564	6.81601	1.68772								shDnmt3a	0.545739	0.652712	0.376844	0.32581
		2	18.02	26.6249	8.60488	0.488423	1.27996
			19.9767	26.4971	6.52041	2.07151							distal #3	GFP	1.08021	0.355775	0.205407
		3	18.5594	26.1034	7.54398	1.01897	0.745652							Dnmt3a	1.26517	0.837832	0.483723	0.742634
			18.1052	26.7584	8.65319	0.472338								shScr	1.19824	0.371524	0.214499
	Dnmt3a	1	19.0078	23.9553	4.94751	6.16277	4.71079	4.80827	0.555799	0.32089	0.000691349			shDnmt3a	1.1308	0.415281	0.239762	0.844208
			18.214	24.0807	5.86675	3.2588
		2	18.1014	23.2378	5.13643	5.40637	5.40637
			19.0228	24.155	5.13215	5.42243
		3	18.0131	23.9093	5.89621	3.19291	4.30767
			18.0045	24.0909	6.08632	2.79871
						8.32927
	shScr	1	18.3327	27.5388	9.20603	0.544589	1.19138	1.14811	0.0819202	0.0472966
			20.2754	27.7265	7.45101	1.83816
		2	19.7931	27.2113	7.41816	1.88049	1.19933
			19.6694	28.9472	9.27778	0.518169
		3	20.9428	28.8444	7.90157	1.34509	1.05363
			19.2003	27.9214	8.72108	0.762172
	shDnmt3a	1	20.7427	28.9184	8.1757	1.11232	0.692253	0.35462	0.295296	0.170489	0.0109492
			19.0442	29.2509	10.2066	0.272183
		2	19.686	30.154	10.4681	0.227071	0.227071
			19.6281	30.5248	10.8968	0.168697
		3	19.556	30.9397	11.3836	0.120377	0.144537
			18.9908	28.7024	9.71153	0.383619
						2.48428
#3	GFP	1	24.5946	27.6001	3.00543	0.696818	1.01152	1.10511	0.492181	0.284161
			24.1889	26.2658	2.07697	1.32622
		2	24.9745	27.915	2.94044	0.728925	0.666444
			24.1525	27.3642	3.21175	0.603963
		3	25.6045	27.8683	2.26381	1.16512	1.63737
			25.6978	27.1051	1.4073	2.10962
	Dnmt3a	1	24.3872	25.2138	0.826511	3.15529	2.93124	2.92091	0.160915	0.0929042	0.00371251
			24.3849	25.4324	1.04749	2.70719
		2	23.4751	24.3381	0.863034	3.07641	3.07641
			24.204	25.2161	1.0121	2.77442
		3	25.8351	26.8674	1.03235	2.73575	2.75508
			24.2933	26.2887	1.99531	1.40344
						2.13213
	shScr	1	25.7676	27.464	1.69646	1.35254	1.26456	1.04029	0.198905	0.114838
			25.5528	27.4503	1.89751	1.17659
		2	24.4141	26.5378	2.12373	1.00583	0.885259
			24.0972	26.6164	2.51919	0.764683
		3	25.1419	26.867	1.72507	1.32598	0.971061
			24.4366	27.2674	2.83079	0.616141
	shDnmt3a	1	25.9061	30.0005	4.09437	0.256629	0.181534	0.299168	0.19151	0.110568	0.00966834
			24.4285	29.7925	5.36402	0.106439
		2	25.6481	28.7232	3.07512	0.520151	0.520151
			25.5099	32.8145	7.30459	0.027729
		3	25.0221	28.6126	3.59048	0.363908	0.195818
			25.7098	32.6156	6.90577	0.0365587
#4						4.86536
	GFP	1	22.7648	27.8659	5.10114	0.849228	1.34093	1.12894	0.200207	0.11559
			22.8439	26.8353	3.99144	1.83264
		2	22.4076	26.7379	4.33027	1.44904	1.10281
			21.5536	26.8214	5.26778	0.756587
		3	21.5877	27.8029	6.21521	0.392333	0.943087
			21.9627	26.249	4.28633	1.49384
	Dnmt3a	1	22.1273	25.8172	3.68993	2.2586	2.2586	1.85162	0.354452	0.204643	0.0371183
			23.7028	NaN
		2	21.936	26.1138	4.17781	1.61055	1.61055
			21.6817	26.0393	4.35766	1.42179
		3	21.9298	25.832	3.90214	1.94966	1.68572
			22.4965	25.9503	3.45379	2.66027
						4.75506
	shScr	1	23.1829	27.8167	4.63382	1.08767	1.08767	1.05821	0.340125	0.196371
			34.0178	28.8261
		2	22.6776	27.71	5.03239	0.825112	0.704309
			21.3442	26.8764	5.53224	0.583506
		3	22.9308	27.2669	4.33606	1.337	1.38264
			22.9463	27.1871	4.24077	1.42829
	shDnmt3a	1	22.2353	27.1313	4.89595	0.906955	0.595756	0.404406	0.171184	0.0988329	0.0409824
			21.8182	28.3865	6.56826	0.284558
		2	23.3712	29.0772	5.70604	0.517282	0.351657
			22.1642	29.3457	7.18143	0.186032
		3	21.4628	29.0139	7.55114	0.143978	0.265805
			22.1153	28.2376	6.1223	0.387632
distal #1						2.38261
	GFP	1	22.1165	25.0108	2.8943	0.701404	0.922343	1.07059	0.204991	0.118352
			22.7964	24.9858	2.18943	1.14328
		2	23.6925	25.9329	2.2404	1.1036	0.984898
			23.4135	26.0033	2.58984	0.866198
		3	23.701	25.7001	1.99909	1.30452	1.30452
			31.0424	24.5536
	Dnmt3a	1	22.5668	24.1252	1.55844	1.77051	1.60006	1.80727	0.320715	0.185165	0.0285087
			22.2396	24.1066	1.86699	1.42961
		2	22.5534	24.4267	1.87321	1.42346	2.17669
			22.3873	23.219	0.831753	2.92992
		3	21.7065	24.458	2.75152	0.774369	1.64506
			23.5154	24.567	1.05162	2.51576
						3.07634
	shScr	1	22.4545	26.1716	3.71711	0.641373	0.671105	1.05665	0.334529	0.19314
			22.6881	26.2773	3.58919	0.700837
		2	23.4939	25.8544	2.36059	1.64235	1.27005
			22.3448	25.5768	3.23196	0.897749
		3	23.2438	25.9848	2.741	1.26168	1.2288
			22.9225	25.7407	2.81822	1.19592
	shDnmt3a	1	22.0427	25.3863	3.34362	0.830884	1.37541	0.600989	0.670741	0.387253	0.351762
			22.9914	25.1267	2.13528	1.91994
		2	23.7141	28.9423	5.22824	0.225017	0.223438
			23.7215	28.9701	5.24863	0.221858
		3	23.7619	29.1578	5.39591	0.200327	0.204116
			23.4462	28.7885	5.34235	0.207905
						8.28153
distal #2	GFP	1	18.2474	26.186	7.93862	1.26832	0.984197	1.15664	0.506568	0.292467
			17.3919	26.1879	8.79595	0.700076
		2	18.8382	27.4061	8.56789	0.819969	1.72691
			18.4327	25.317	6.88436	2.63386
		3	19.5223	27.8156	8.29338	0.991823	0.758801
			18.1155	27.3245	9.20901	0.525779
	Dnmt3a	1	17.8354	26.2911	8.45562	0.886326	1.0554	1.52023	0.402575	0.232427	0.385526
			18.0638	26.0532	7.98938	1.22446
		2	18.8637	26.3814	7.51769	1.698	1.75615
			18.704	26.1261	7.42212	1.8143
		3	18.2535	25.0348	6.78131	2.82886	1.74915
			17.7617	26.6222	8.86052	0.669432
						7.49728
	shScr	1	18.1999	26.3201	8.00452	0.703568	0.98026	1.14743	0.664382	0.383581
			17.1803	26.6352	7.16735	1.25695
		2	18.3156	26.2707	6.54572	1.93396	1.87943
			19.4678	26.604	6.62945	1.82491
		3	19.7249	27.0182	8.66653	0.444654	0.582603
			19.9745	27.1142	7.9701	0.720552
	shDnmt3a	1	18.3517	27.9018	9.51415	0.247093	0.368428	0.545739	0.652712	0.376844	0.32581
			19.1441	27.8945	8.52712	0.489764
		2	18.3877	26.5599	8.1691	0.627715	1.26879
			19.3674	26.141	6.56381	1.90986
		3	18.3908	26.923	26.923	1.41997e-06	1.88493e-06
			19.5772	26.1963	26.1963	2.34989e-06
						7.87199
distal #3	GFP	1	20.4032	27.7734	7.37022	1.41596	1.32639	1.08021	0.355775	0.205407
			20.8145	28.3799	7.56535	1.23683
		2	19.4989	28.6839	9.18499	0.402483	0.672303
			20.1542	28.1122	7.95801	0.942123
		3	20.7582	28.1111	7.35282	1.43314	1.24194
			20.3785	28.1791	7.80058	1.05075
	Dnmt3a	1	20.2969	27.7599	7.46301	1.32775	2.17409	1.26517	0.837832	0.483723	0.742634
			20.8661	27.1433	6.27724	3.02043
		2	20.7251	28.4626	7.7375	1.09771	1.09771
			19.3818	NaN
		3	19.976	28.5703	8.5943	0.606129	0.523721
			20.2725	29.3246	9.05212	0.441313
						8.73783
	shScr	1	21.3225	29.2097	7.88719	1.8033	1.26734	1.19824	0.371524	0.214499
			20.4679	29.657	9.18913	0.731384
		2	20.4691	30.1699	9.70075	0.513015	1.53036
			22.7539	30.1425	7.38863	2.5477
		3	20.1466	29.7152	9.56857	0.56224	0.797011
			21.7326	30.4253	8.69269	1.03178
	shDnmt3a	1	21.9044	29.6169	7.71243	2.03552	1.57548	1.1308	0.415281	0.239762	0.844208
			21.216	29.7962	8.58021	1.11544
		2	21.1947	30.8584	9.6637	0.526361	1.06386
			20.7452	28.8038	8.05853	1.60136
		3	20.0253	29.9	9.87472	0.454737	0.753053
			21.9452	30.6108	8.66556	1.05137

## Sheet: Fig6C
						input	IP		6.77831	Fold enrichment	AVG Fold	STD	SEM	p-value
			#1	WT	1	21.1657	28.1683	7.00266	0.855979	1.16603	1.02838	0.198329	0.114505
						21.6657	27.8822	6.21653	1.47609
					2	22.0618	28.5217	6.45985	1.24699	1.11806
						21.2429	28.037	6.79407	0.989133
					3	21.2745	28.3635	7.08897	0.806271	0.801054
						21.0728	28.1806	7.10776	0.795838
				KO	1	22.1552	28.7066	6.55134	1.17037	0.751538	0.439178	0.271011	0.156468	0.0384455
						20.8579	29.2239	8.36601	0.332702
					2	21.6066	30.2817	8.67508	0.268544	0.299445
						22.2239	30.6002	8.37625	0.330347
					3	21.5817	30.8092	9.22757	0.183105	0.266552
						24.2002	32.4931	8.29289	0.349999
									8.38343
			#2	WT	1	18.8092	27.0275	8.21829	1.12128	1.4166	0.986379	0.396631	0.228995
						18.4931	26.1009	7.60781	1.71193
					2	19.0275	NaN			0.635264
						18.1009	27.1389	9.038	0.635264
					3	18.7392	27.1775	8.43825	0.96272	0.907269
						18.1616	26.7764	8.61482	0.851818
				KO	1	18.4373	28.7937	10.3564	0.254727	0.476969	0.275049	0.176936	0.102154	0.0470181
						19.7902	28.6898	8.89963	0.699211
					2	19.075	30.87	11.7949	0.0939808	0.147111
						19.5528	30.2564	10.7036	0.200242
					3	18.7858	29.084	10.2982	0.265215	0.201068
						20.0362	31.2882	11.252	0.13692
									3.56158
			#3	WT	1	23.7012	26.6784	2.97724	1.49935	1.15614	1.09591	0.165525	0.0955657
						23.9816	27.8419	3.86036	0.812939
					2	24.4582	27.6453	3.18708	1.29639	0.908703
						24.1633	28.6655	4.50218	0.521014
					3	24.5594	27.3114	2.75194	1.75277	1.22288
						23.2189	27.3095	4.09066	0.692993
				KO	1	23.1706	30.1768	7.00612	0.0918523	0.197795	0.40791	0.209262	0.120817	0.0111068
						24.9439	30.2246	5.28068	0.303737
					2	23.6262	28.289	4.66273	0.466144	0.616308
						24.1942	28.1394	3.94527	0.766473
					3	23.9699	29.2261	5.25621	0.308933	0.409628
						26.5819	31.114	4.5321	0.510323
									4.33322
			#4	WT	1	22.1258	26.2877	4.16188	1.12611	0.936544	1.07151	0.1234	0.0712452
						21.2928	26.0469	4.75408	0.746981
					2	21.5835	25.8272	4.24378	1.06395	1.17856
						22.5917	26.554	3.96231	1.29317
					3	23.0217	28.3198	5.29811	0.512318	1.09942
						25.2746	28.8538	3.57917	1.68652
				KO	1	21.6121	27.8391	6.22702	0.269097	0.215405	0.392555	0.386017	0.222867	0.0440389
						20.9859	27.9476	6.96172	0.161713
					2	21.2493	25.4278	4.1785	1.1132	0.835351
						21.0199	26.1961	5.17618	0.557497
					3	21.4231	28.7035	7.28036	0.129665	0.126908
						24.4236	31.7666	7.34305	0.124152
									4.51013
			distal 1	WT	1	21.0519	25.4602	4.40824	1.07318	1.13435	1.03272	0.176193	0.101725
						21.6454	25.8979	4.25249	1.19552
					2	21.4795	26.4558	4.97626	0.723902	0.829268
						21.0378	25.6455	4.60765	0.934633
					3	21.5512	26.4443	4.89306	0.766875	1.13454
						22.2874	26.2104	3.92305	1.5022
				KO	1	22.03	27.3006	5.27063	0.590291	0.506195	0.58014	0.170051	0.0981788	0.0328619
						22.1506	27.9051	5.75447	0.422099
					2	21.1086	26.4699	5.36126	0.554349	0.774645
						22.2838	26.8013	4.51744	0.994941
					3	21.1749	27.9611	6.78626	0.20645	0.459581
						24.7324	29.7312	4.99874	0.712712
									8.70468
			distal2	WT	1	18.7682	27.1408	8.3726	1.25882	1.60282	1.07319	0.459794	0.265462
						19.3204	27.064	7.74356	1.94682
					2	18.0777	28.0501	9.97237	0.415325	0.840471
						19.0755	27.4403	8.36484	1.26562
					3	18.5898	27.6599	9.07003	0.776283	0.776283
						NaN	28.0686
				KO	1	18.3759	27.8046	9.42869	0.60541	0.986183	1.14907	0.287556	0.166021	0.820432
						19.7232	27.9769	8.25371	1.36696
					2	17.8832	27.2295	9.34637	0.640962	0.979934
						18.9938	27.2991	8.30534	1.31891
					3	18.8719	27.5988	8.72691	0.984712	1.48109
						22.0677	29.7888	7.72102	1.97747
									7.88023
			distal3	WT	1	20.7156	28.3107	7.59512	1.2185	0.993049	1.05115	0.270915	0.156413
						20.1478	28.4096	8.26181	0.767596
					2	20.4151	28.2075	7.79242	1.06275	0.813996
						20.2437	28.947	8.70329	0.565241
					3	21.1732	28.4418	7.2686	1.52798	1.3464
						20.7193	28.3795	7.66013	1.16481
				KO	1	20.6559	28.3669	7.71101	1.12445	1.04224	0.7892	0.219252	0.126585	0.262888
						20.8142	28.7533	7.93906	0.960042
					2	20.1234	29.3196	9.19615	0.401669	0.669579
						21.0957	29.069	7.97335	0.93749
					3	21.911	30.2	8.28899	0.753271	0.655774
						23.0901	31.8112	8.72117	0.558277

## Sheet: Fig6D
Exp1						1.36313
	Fgf21_Luc	Dnmt3a	Renilla	Firefly	Firefly/Renilla	Fold stimulation	AVG	STD	SEM	p-value
	-	-	745	977.2	1.31168	0.962256	1	0.235309	0.135855
			654	1116.05	1.7065	1.2519
			870	931.95	1.07121	0.785845
	+	-	674	6711.1	9.95712	7.30461	5.82234	1.28484	0.7418
			734	5138.27	7.00037	5.13552
			821	5625.73	6.85228	5.02688
	+	100	700	3522.75	5.0325	3.69188	3.5495	0.143192	0.0826717	0.038211
			832	4027.4	4.84063	3.55112
			789	3662.65	4.64214	3.40551
	+	300	803	2149.84	2.67726	1.96406	2.22308	0.514337	0.296953	0.010785
			561	2153	3.83779	2.81543
			757	1950	2.57596	1.88974
	+	500	688	2317	3.36773	2.47059	2.04418	0.393928	0.227435	0.00822268
			832	2232.1	2.68281	1.96813
			764	1764	2.3089	1.69383
Exp2						1.76738
	Fgf21_Luc	Dnmt3a	Renilla	Firefly	Firefly/Renilla	Fold stimulation	AVG	STD	SEM	p-value
	-	-	511	832	1.62818	0.921239	1	0.257109	0.148442
			458	1042	2.27511	1.28728
			524	733	1.39885	0.791484
	+	-	537	5090	9.47858	5.36307	5.99336	1.02929	0.594258
			451	5724	12.6918	7.18113
			578	5553	9.60727	5.43588
	+	100	439	2711	6.1754	3.4941	3.27131	0.285106	0.164606	0.0115613
			452	2692	5.95575	3.36982
			580	3024	5.21379	2.95001
	+	300	623	2222	3.56661	2.01802	2.25879	0.45499	0.262688	0.00454151
			612	2136	3.4902	1.97478
			560	2755	4.91964	2.78358
	+	500	683	1903	2.78624	1.57648	1.35149	0.306834	0.17715	0.00170313
			690	1800	2.6087	1.47602
			803	1422	1.77086	1.00197
