# Supplementary material for: Dnmt3a is an epigenetic mediator of adipose insulin resistance
Source: eLife. 2017 Nov 1;6:e30766. doi: 10.7554/eLife.30766 (PMC5730374; doi:10.7554/eLife.30766)
Supplement: Supplementary file 1. — GFP and shDnmt3a/shScr. [file elife-30766-supp1.xlsx]

## Sheet: Supplemental Table1
Supplemental Table 1. Genes that are up-regulated (UP) and down-regulated (DOWN) Dnmt3a vs. GFP and shDnmt3a/shScr
Dnmt3a/GFP							shDnmt3a/shScr
UP			DOWN				UP			DOWN
Symbol	Log2 fold changes		Symbol	Log2 fold changes			Symbol	Log2 fold changes		Symbol	Log2 fold changes
Dnmt3a	4.879		Inhba	1.003			Mif	1.001		Gbp10	2.297
Ugt3a2	1.608		Diap3	1.006			Cyp39a1	1.002		Tmprss2	2.059
Serpinb9f	1.445		Grem1	1.01			Ccdc69	1.003		Ifit3	2.005
Mia2	1.404		Nek2	1.012			5830416P10Rik	1.003		Oas1g	1.853
AK144265	1.127		Hmga2	1.025			Alpl	1.005		I830012O16Rik	1.776
Tg	1.067		Efnb2	1.028			BC018473	1.005		Oas1a	1.717
Mmp27	1.06		Il1rl1	1.029			Akap6	1.009		Hhatl	1.716
Lars2	1.033		Ovgp1	1.03			Lrg1	1.01		Ifit1	1.702
			Chd5	1.033			Wdr54	1.01		Tmem204	1.679
			Filip1l	1.053			Cpt1b	1.011		Gbp9	1.668
			Lphn3	1.068			AK078979	1.014		Cmpk2	1.654
			Ereg	1.078			AK016661	1.015		Mpeg1	1.641
			1700022I11Rik	1.082			Lmod1	1.02		Gpr88	1.638
			Car6	1.083			Isg20	1.02		Apol9b	1.604
			Ccl2	1.085			Lamb3	1.021		Gm12250	1.586
			Serpina3h	1.115			Krt80	1.021		Isg15	1.585
			P2rx7	1.125			E030003E18Rik	1.023		Slfn9	1.574
			Lif	1.126			Ppm1h	1.024		Mx1	1.573
			Tubb2b	1.139			Rian	1.025		Cml3	1.558
			Hif3a	1.152			AK090209	1.026		Cnrip1	1.539
			Cenpf	1.181			Tns4	1.035		Upp1	1.509
			AK160548	1.203			Lbp	1.036		Bicc1	1.49
			Ptx3	1.215			Aknad1	1.038		Rnf213	1.487
			Prkg2	1.227			Rs1	1.039		Gck	1.477
			Fgd3	1.232			Krt36	1.042		AK217856	1.47
			Plk2	1.244			Gys1	1.045		Oas2	1.469
			Abcb1b	1.265			Slc38a1	1.049		Apol9a	1.459
			Serpina3g	1.293			Hs3st3a1	1.052		Sema7a	1.458
			Fgf21	1.346			Ptchd1	1.052		Mx2	1.43
			Kif23	1.459			Slc6a7	1.053		Psmb8	1.419
			Gadd45b	1.567			Ulbp1	1.053		4933437F05Rik	1.379
			Igsf9	1.72			Has2	1.053		Mreg	1.375
			Ptgs2	1.758			A530053G22Rik	1.055		Usp18	1.373
			Klf5	1.801			Hist1h2ac	1.056		2010002M12Rik	1.372
			Nfkbie	1.938			Limk1	1.06		Sp110	1.353
			Sez6	2.346			Mxi1	1.062		Apod	1.352
							Slc38a4	1.063		Ly6a	1.349
							Klf4	1.064		BC075659	1.346
							Lars2	1.065		Asb10	1.335
							Styk1	1.067		Dio2	1.322
							Pdxp	1.068		Gbp4	1.307
							Gldc	1.068		H2-T9	1.306
							Cd93	1.068		Rtp4	1.3
							Rassf7	1.071		Cxcl10	1.268
							AK153534	1.071		Oasl2	1.266
							Mc2r	1.072		AK156902	1.259
							Lgi4	1.073		Retn	1.25
							Atp8b4	1.077		Rsad2	1.246
							Plod1	1.08		Msi2	1.205
							Il15	1.081		Irf7	1.204
							Olfml2a	1.081		Fmod	1.201
							AK156148	1.09		Cpa3	1.198
							Pgam1	1.095		Psmb9	1.184
							Igsf21	1.097		Csprs	1.184
							Gabre	1.097		Slfn8	1.18
							AK039487	1.098		Igtp	1.176
							Kcnk2	1.099		Pcyox1l	1.166
							Plod2	1.101		Ralgapa2	1.159
							Pdk3	1.102		Elovl6	1.159
							Grem2	1.108		Gvin1	1.146
							Mlf1	1.108		Sdcbp2	1.143
							Plxdc1	1.109		Prrx2	1.14
							Tcte2	1.11		BC038927	1.137
							Ranbp3l	1.114		Loxl3	1.134
							Gbe1	1.116		Lgmn	1.128
							Apoa4	1.118		Ei24	1.115
							Camp	1.125		Csprs	1.11
							Camk1d	1.126		AK079670	1.106
							Trp63	1.129		Gbp3	1.106
							AK047141	1.129		Egfl7	1.105
							Pdlim4	1.131		Fhl2	1.103
							Kcnma1	1.134		AK041647	1.094
							Fos	1.144		BC023105	1.092
							Grb10	1.147		Sarm1	1.091
							F11r	1.148		H2-T10	1.086
							Gprin3	1.148		AI480653	1.083
							Bnip3	1.153		Cyp2e1	1.075
							AU021092	1.155		Adcyap1r1	1.074
							Ldb3	1.156		Ddx60	1.067
							Comp	1.158		Ly6e	1.058
							Mustn1	1.159		Ifi27l2a	1.057
							Arrdc4	1.159		Dpp7	1.057
							Atf3	1.159		Gxylt2	1.054
							Adcy5	1.163		Gm7609	1.046
							Tmem82	1.164		Ifih1	1.043
							Has1	1.164		Dnmt3a	1.042
							Lphn3	1.164		Cfb	1.028
							Cubn	1.166		Setdb2	1.021
							Ldha	1.17		Trim69	1.019
							Clca3	1.173		Gbp4	1.018
							Stc1	1.174		H2-T23	1.014
							Gm9524	1.177		Olfr56	1.014
							Arhgef37	1.177		Tap1	1.013
							Serpinb1a	1.18		H2-Q1	1.01
							A630033H20Rik	1.18		Dhx58	1.009
							Hdac9	1.183		Bst2	1.004
							Adamts8	1.184		H2-t9	1.001
							Abcc9	1.185
							Kcnj14	1.187
							Sctr	1.192
							Cck	1.2
							Coro2b	1.225
							Plce1	1.225
							AK135671	1.23
							Il13ra2	1.231
							Hist1h3d	1.241
							Cish	1.242
							Atp7b	1.245
							Efnb2	1.245
							A4galt	1.248
							Loxl2	1.248
							Ahr	1.251
							Hist1h2bg	1.263
							Car1	1.265
							Gm5506	1.271
							Steap4	1.271
							Cyp2c44	1.273
							Astn2	1.275
							Ptpre	1.282
							1700018A04Rik	1.284
							Sdc3	1.284
							4631405J19Rik	1.287
							Chst15	1.289
							Cma1	1.292
							Gm9790	1.296
							Ntrk3	1.302
							Npnt	1.306
							Spp1	1.307
							Ier3	1.308
							Ppp1r3b	1.311
							Ano1	1.314
							Pdk1	1.315
							Brca1	1.318
							Gm5506	1.318
							Polr3g	1.324
							Sap30	1.333
							Sdc4	1.335
							Tnfrsf23	1.337
							Lcn2	1.349
							Fgd3	1.354
							Serpinb9b	1.355
							3930402G23Rik	1.367
							Hspa1b	1.372
							Htra1	1.38
							Flrt3	1.381
							Gm5523	1.388
							Emb	1.393
							Kbtbd11	1.395
							Tnni3k	1.404
							2310016C08Rik	1.404
							Ipw	1.408
							Plekha2	1.409
							Ddit4	1.412
							Olfr1033	1.414
							Myo5c	1.421
							Apoc3	1.423
							Gpr116	1.428
							AY512943	1.434
							Filip1l	1.436
							P2rx1	1.453
							Tbxa2r	1.456
							Maff	1.456
							AI427809	1.46
							Calr4	1.46
							Lamc2	1.462
							D830046C22Rik	1.472
							Arc	1.482
							Htra3	1.487
							Pde1b	1.488
							Slc5a7	1.503
							Camk2a	1.511
							Gapdh	1.516
							Cd74	1.53
							Arhgap6	1.538
							Lrrc4c	1.542
							Bsg	1.543
							Pgk1	1.555
							Zc3h12d	1.559
							Gm11110	1.559
							Hspa1a	1.559
							Mt2	1.589
							Slc2a1	1.59
							Gapdh	1.596
							Prelid2	1.609
							Ero1l	1.613
							Gm5177	1.615
							Gdf15	1.616
							Itga11	1.619
							Lox	1.637
							Egln1	1.656
							AK146937	1.665
							Grtp1	1.669
							Ptgs2	1.682
							Nrn1	1.695
							Palmd	1.698
							Trfr2	1.699
							Actr3b	1.699
							AK014513	1.702
							Siglec15	1.711
							Fcrlb	1.729
							Fam162a	1.733
							Lrit1	1.739
							Spon2	1.746
							Ppp1r3c	1.751
							Gpr120	1.757
							Dusp27	1.778
							Serpine1	1.805
							Trem2	1.808
							Oit3	1.814
							Slc22a20	1.825
							Ddc	1.825
							P4ha2	1.828
							Nod2	1.83
							Lrp2bp	1.835
							A130040M12Rik	1.842
							Csnk1d	1.853
							Snap25	1.867
							Tec	1.885
							Mme	1.887
							Sbsn	1.887
							Slc25a34	1.888
							Mlph	1.905
							Cd53	1.94
							Apln	1.954
							Tmem45a	1.965
							Klhl30	1.97
							Tnfsf9	1.97
							Cyp4a32	1.972
							Plekhg4	1.99
							Ak4	2.006
							Eno2	2.03
							Sema6b	2.041
							Itgb8	2.05
							C1qtnf1	2.101
							Selenbp1	2.118
							Selenbp2	2.12
							Ptch2	2.121
							Cpa5	2.125
							AK077157	2.126
							Peg10	2.136
							AK015404	2.182
							Serpinb1a	2.208
							Ndrg1	2.251
							Egln3	2.286
							Dmkn	2.29
							Baalc	2.313
							AK076984	2.317
							Rasgrf2	2.324
							Catsperg2	2.356
							Mthfd1l	2.408
							Rassf4	2.435
							Fam46b	2.449
							Col12a1	2.476
							Cyp4a10	2.523
							Gpnmb	2.541
							Synpo2	2.576
							BC065997	2.59
							Pappa2	2.598
							Snta1	2.61
							Muc13	2.649
							Ctgf	2.79
							Slpi	2.924
							Olr1	2.928
							Lman1l	3.006
							Cyp2ab1	3.041
							Ehhadh	3.053
							Dusp9	3.059
							Cpa1	3.076
							8430408G22Rik	3.095
							Gpr35	3.106
							Fa2h	3.155
							Dub1	3.169
							Gpr133	3.198
							Serpinb6b	3.218
							Car9	3.226
							Serpinb9c	3.235
							Sema3g	3.259
							Fgf21	3.427
							Ang3	3.472
							Serpinb9e	3.868
							Cdhr1	3.953
							Acer2	3.994
							Rgs4	4.011
							Pnliprp1	4.449
							Ghrh	4.524
							AK012157	4.735
							Hmgcs2	5.035
							Serpinb9g	5.174
							P2rx7	5.361
							Serpinb9f	5.514
