# Supplementary material for: Dnmt3a is an epigenetic mediator of adipose insulin resistance
Source: eLife. 2017 Nov 1;6:e30766. doi: 10.7554/eLife.30766 (PMC5730374; doi:10.7554/eLife.30766)
Supplement: Supplementary file 2. [file elife-30766-supp2.xlsx]

## Sheet: Sheet1
Supplemental Table 2. DNA methylation of four CpG sites annotated to Fgf21 showing differential DNA methylation in adipose tissue of a case control study for type 2 diabetes (28 cases and 28 controls)
mean methylation_of_T2D	std_dev_of_T2D	mean methylation_of_controls	std_dev_of_controls	diff_of_means_T2D_minus_controls	pvalues	TargetID	ProbeID_A	ProbeID_B	ILMNID	NAME	ADDRESSA_ID	ALLELEA_PROBESEQ	ADDRESSB_ID	ALLELEB_PROBESEQ	INFINIUM_DESIGN_TYPE	NEXT_BASE	COLOR_CHANNEL	FORWARD_SEQUENCE	GENOME_BUILD	CHR	MAPINFO	SOURCESEQ	CHROMOSOME_36	COORDINATE_36	STRAND	PROBE_SNPS	PROBE_SNPS_10	RANDOM_LOCI	METHYL27_LOCI	UCSC_REFGENE_NAME	UCSC_REFGENE_ACCESSION	UCSC_REFGENE_GROUP	UCSC_CPG_ISLANDS_NAME	RELATION_TO_UCSC_CPG_ISLAND	PHANTOM	DMR	ENHANCER	HMM_ISLAND	REGULATORY_FEATURE_NAME	REGULATORY_FEATURE_GROUP	DHS	Index	Var.38
0.567835	0.0461416	0.532551	0.0481429	0.0352846	0.00155479	cg21967668	11800485	11800485	cg21967668	cg21967668	11800485	RATAAAATTCTATAACTCCTACCAAATAAATCAAATATCATAATTCAAAC	NA		II			GCCCTTGCCACGATGGAATTCTGTAGCTCCTGCCAAATGGGTCAAATATCATGGTTCAGG[CG]CAGGGAGGGTGATTGGGCGGGCCTGTCTGGGTATAAATTCTGGAGCTTCTGCATCTATCC	37	19	49259265	CGCCTGAACCATGATATTTGACCCATTTGGCAGGAGCTACAGAATTCCAT	19	53951077	R			NA	NA	FGF21;FUT1	NM_019113;NM_000148	TSS200;TSS1500	chr19:49255778-49256495	S_Shelf			TRUE				NA	390050	NA
0.752811	0.0349104	0.732778	0.0309961	0.0200325	0.00606003	cg21591807	27734365	27734365	cg21591807	cg21591807	27734365	AATTCCTTAATCCTCAACAAAACRACAATTACTATATAAAAAAAACRACC	NA		II			TTGAGGTTGGCCCACGGCCAGGTGAGAGGCTTCCAAGGCAGGATACTTGTGTCTCAGATG[CG]GTCGCTTCTTTCATACAGCAATTGCCGCCTTGCTGAGGATCAAGGAACCTCAGTGTCAGA	37	19	49258851	CGGTCGCTTCTTTCATACAGCAATTGCCGCCTTGCTGAGGATCAAGGAAC	19	53950663	F	rs2231859		NA	NA	FGF21;FUT1	NM_019113;NM_000148	TSS1500;TSS1500	chr19:49255778-49256495	S_Shelf			NA				NA	384426	NA
0.292864	0.0622301	0.255826	0.0533492	0.0370385	0.00654876	cg13881341	56744324	56744324	cg13881341	cg13881341	56744324	RCCTAAACCATAATATTTAACCCATTTAACAAAAACTACAAAATTCCATC	NA		II			AGTCTGGCCCTCCATTGAAAGGACCCCAGGTTACATCATCCATTCAGGCTGCCCTTGCCA[CG]ATGGAATTCTGTAGCTCCTGCCAAATGGGTCAAATATCATGGTTCAGGCGCAGGGAGGGT	37	19	49259215	CCTGAACCATGATATTTGACCCATTTGGCAGGAGCTACAGAATTCCATCG	19	53951027	F			NA	TRUE	FGF21;FUT1	NM_019113;NM_000148	TSS200;TSS1500	chr19:49255778-49256495	S_Shelf			TRUE				NA	256850	NA
0.682712	0.0336423	0.659739	0.0340722	0.0229724	0.00885972	cg16155702	67609509	67609509	cg16155702	cg16155702	67609509	RCTAACACAAAAACCTAAATATCTTAACTCCCAAAATTTAAATAACTCCC	NA		II			TCCTCGAACCACCTTATCGCTTTCACCCCTTAGGTCTCCTGCAGCTGAAAGCCTTGAAGC[CG]GGAGTTATTCAAATCTTGGGAGTCAAGACATCCAGGTTCCTGTGCCAGCGGCCAGATGGG	37	19	49260210	CGGGAGTTATTCAAATCTTGGGAGTCAAGACATCCAGGTTCCTGTGCCAG	19	53952022	F			NA	TRUE	FGF21	NM_019113	Body	chr19:49255778-49256495	S_Shelf			NA				NA	297277	NA
