# Supplementary figures and images for: Dnmt3a is an epigenetic mediator of adipose insulin resistance
Source: eLife journal article supplement (doi:10.7554/elife.30766), 2017-11-01

Figure 1-figure supplement

**A**

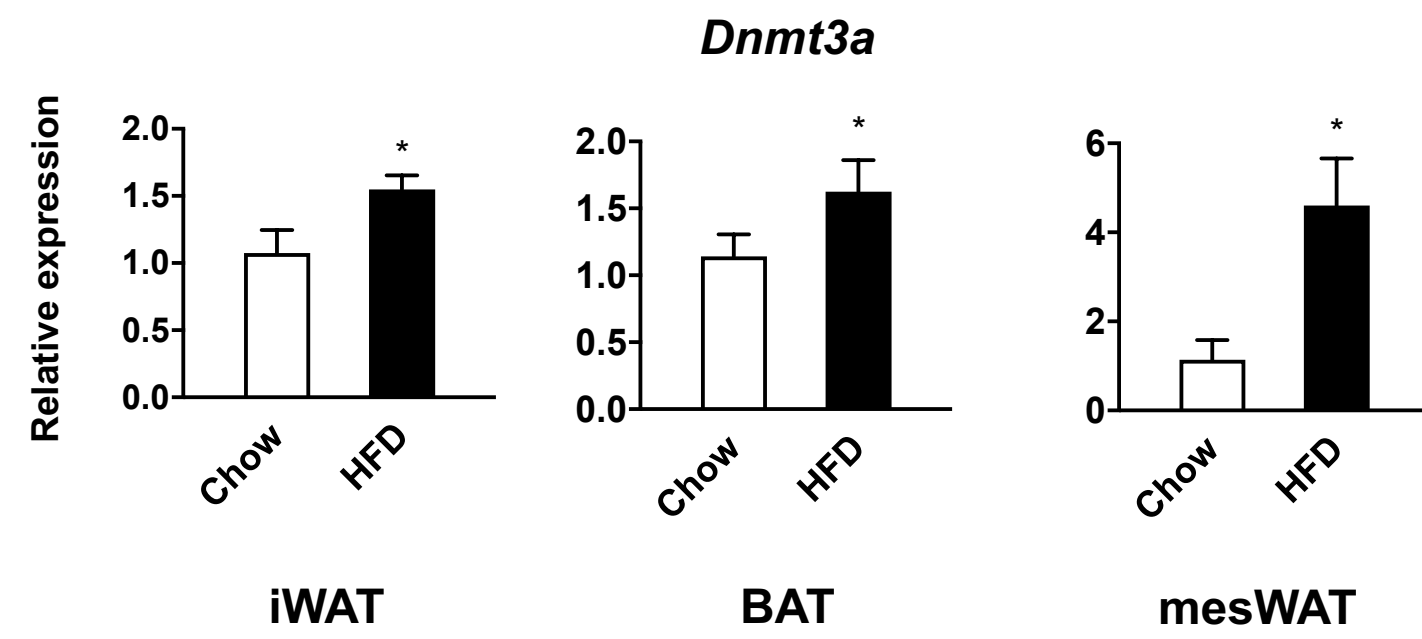

**B**

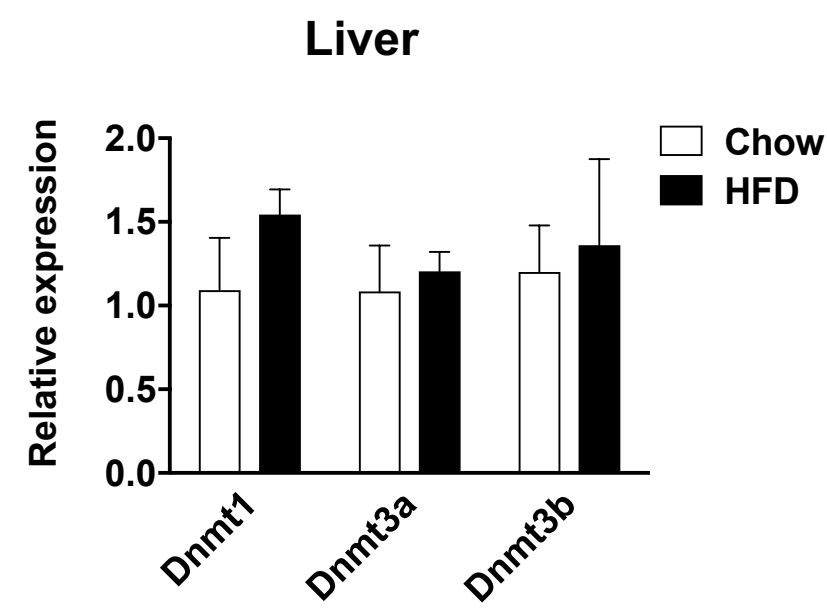

**C**

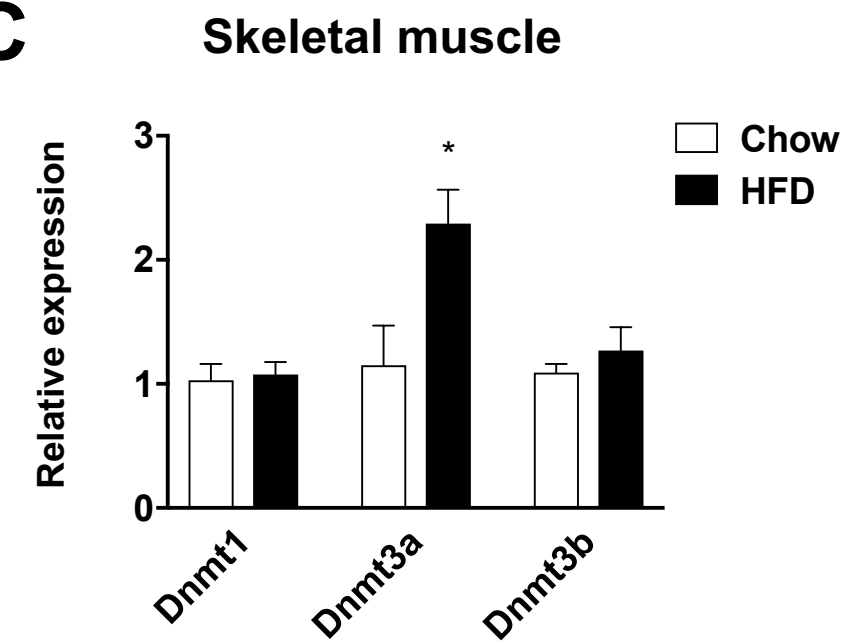

**D**

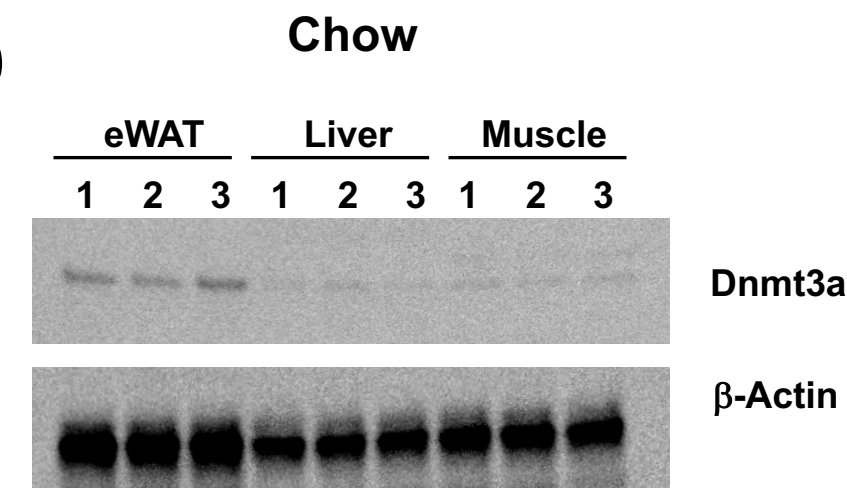

**E**

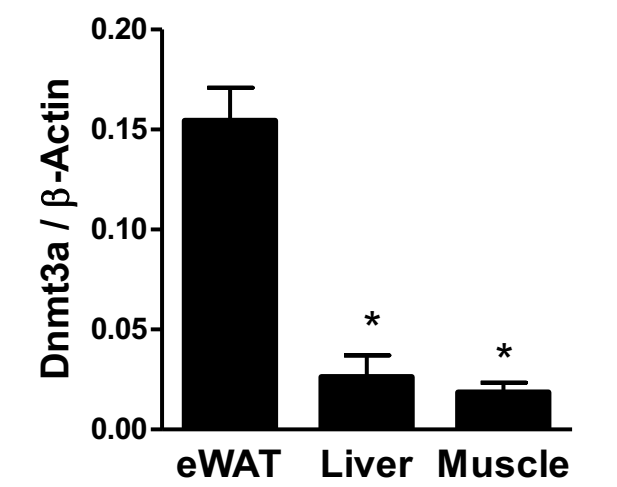

**F**

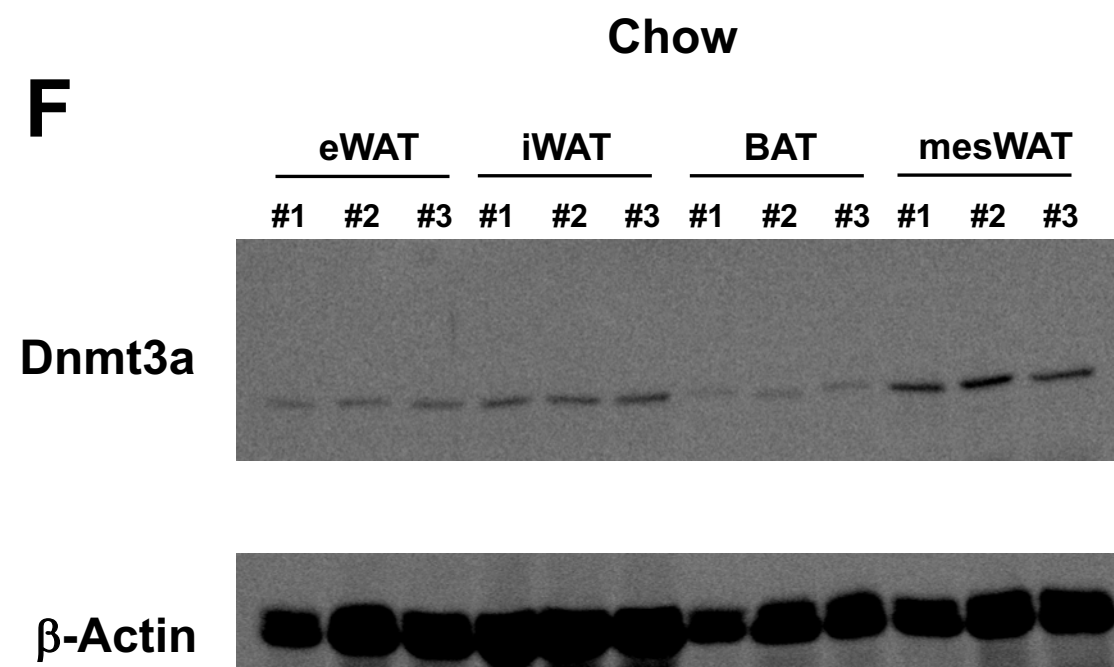

**G**

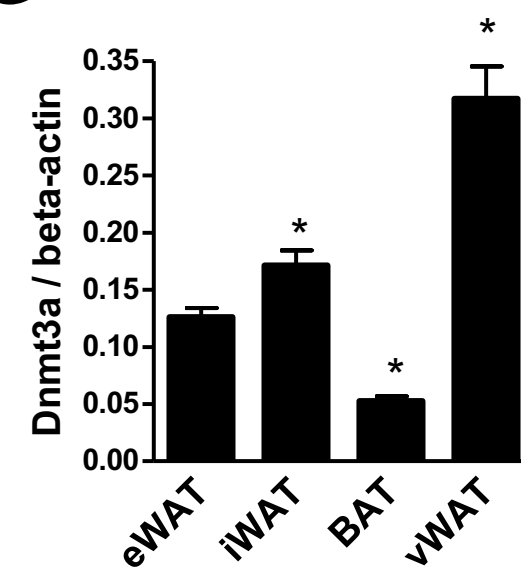

Supplement: supp [file elife_poa_e30766_Figure_1_figure_supplement_1.pdf › elife_poa_e30766_Figure_1_figure_supplement_1.pdf]

Figure 2-figure supplement 1

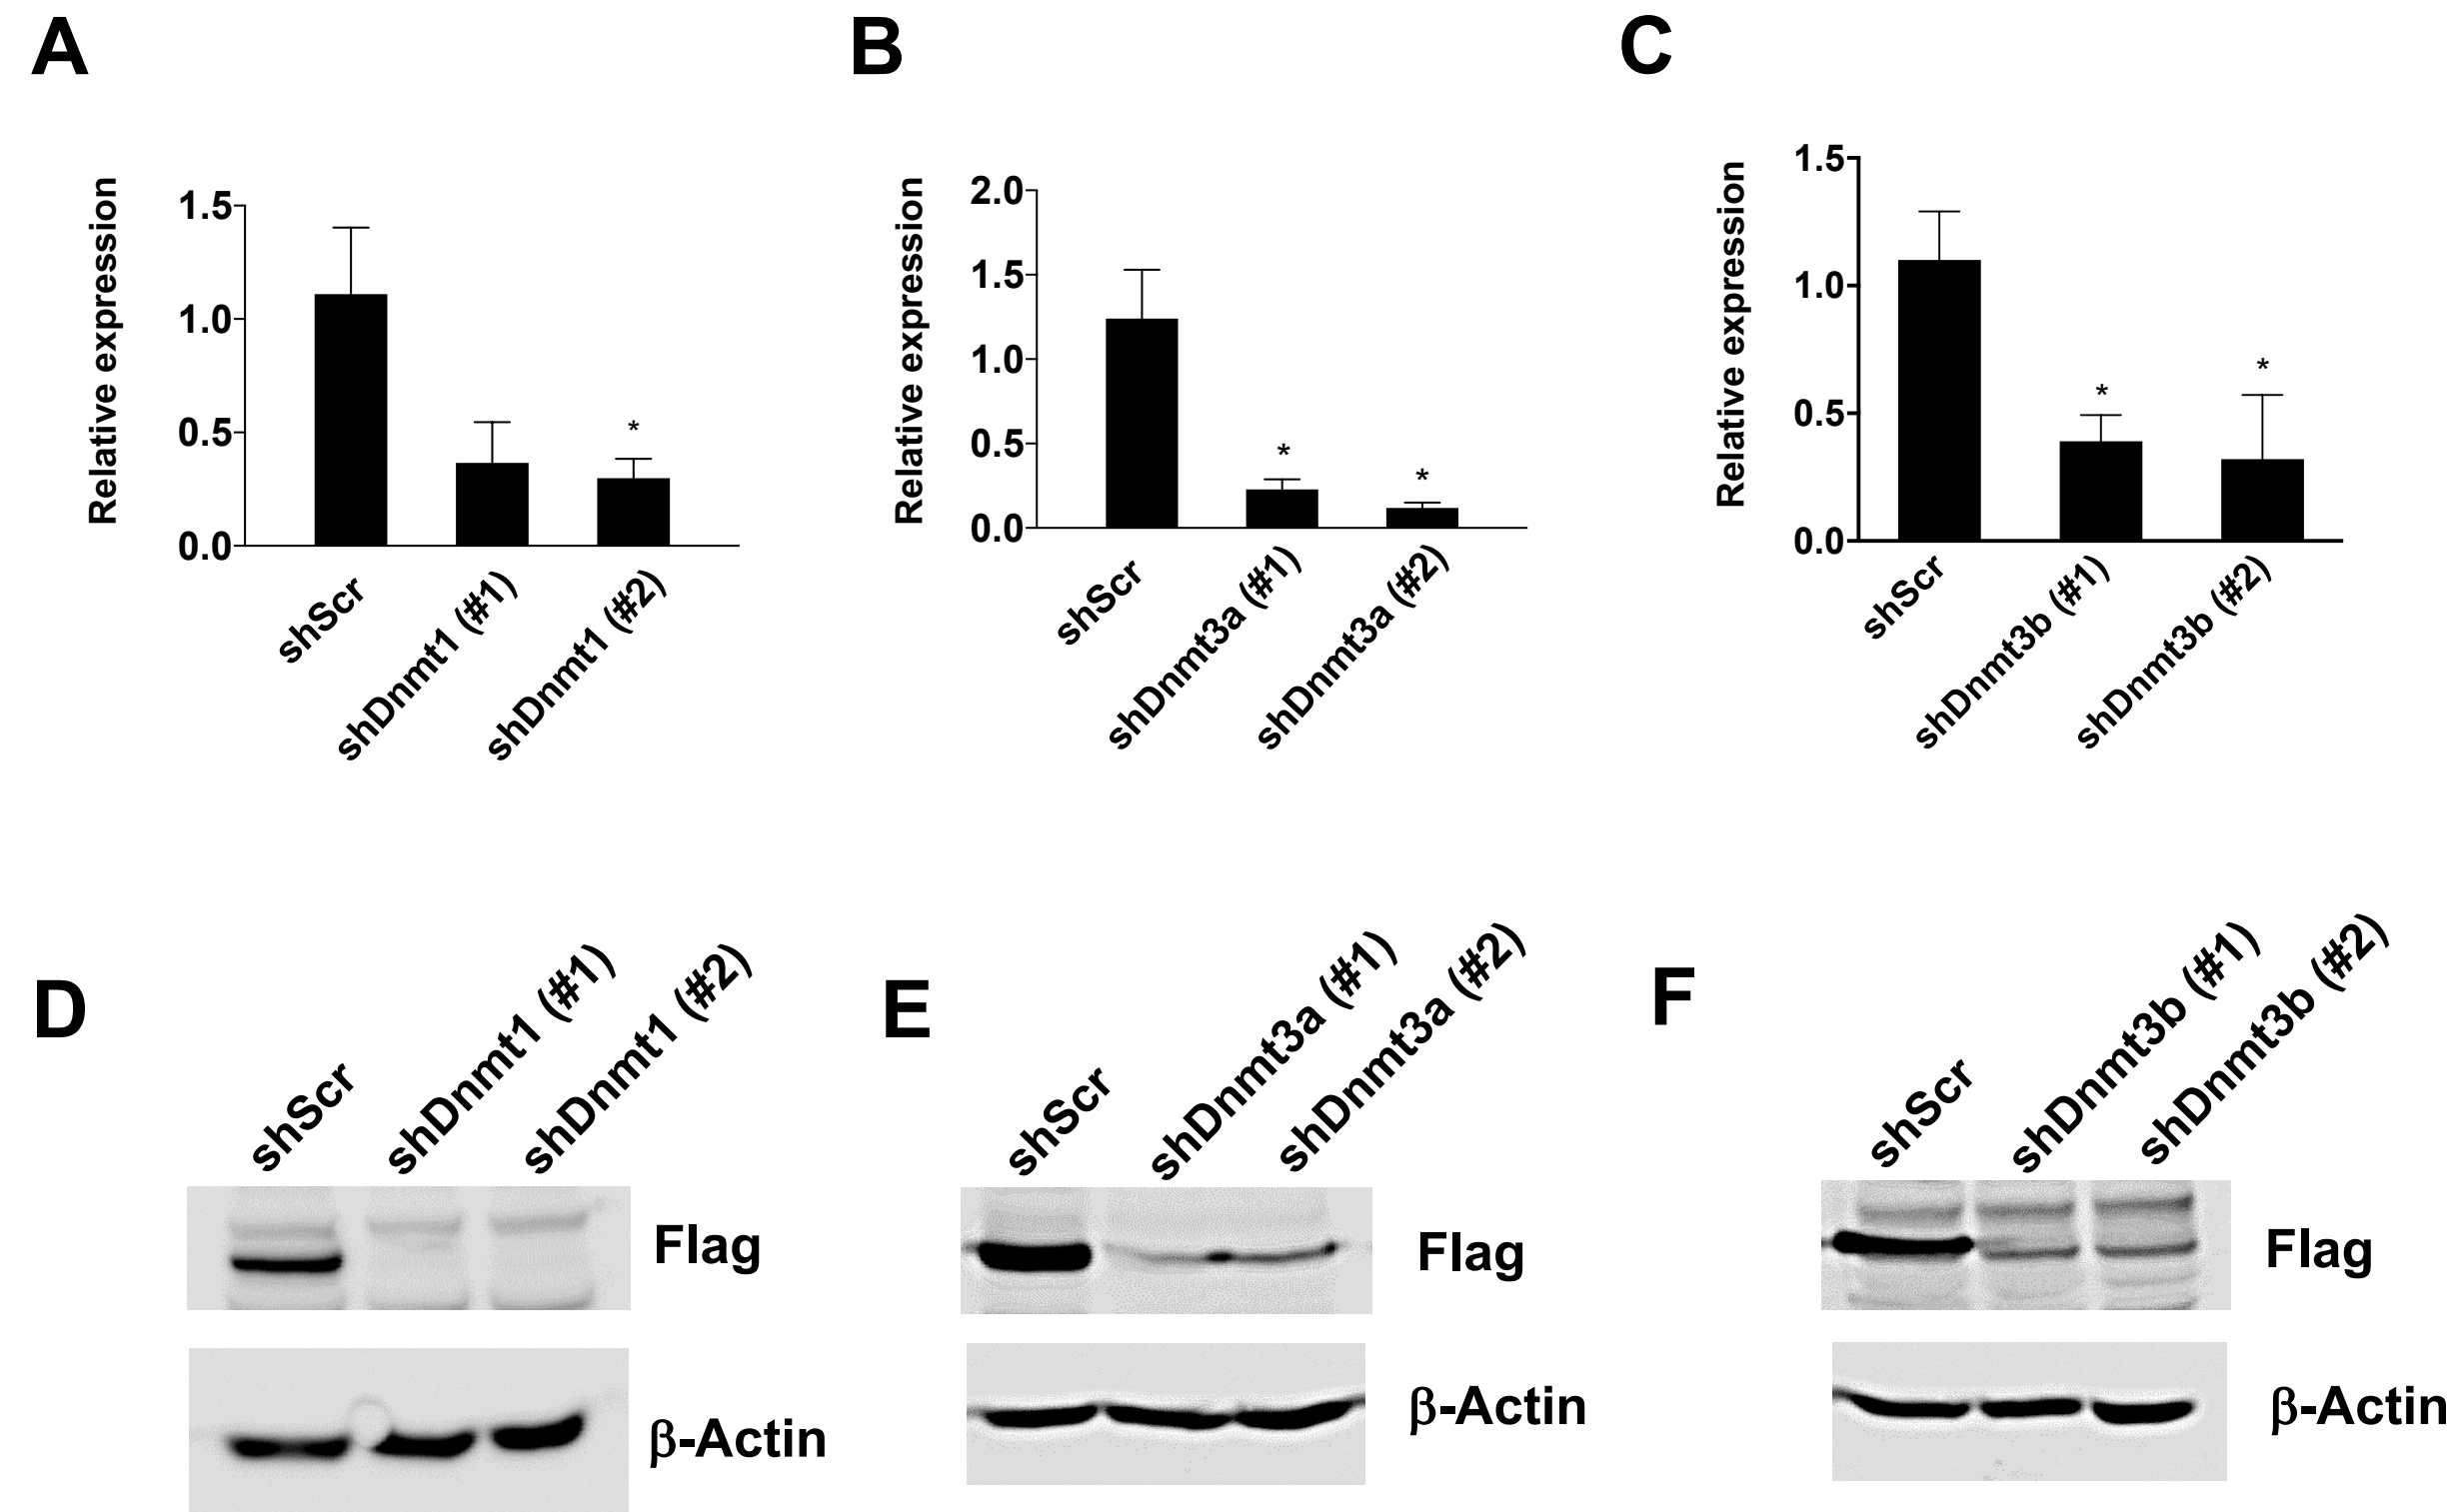

Supplement: supp [file elife_poa_e30766_Figure_2_figure_supplement_1.pdf › elife_poa_e30766_Figure_2_figure_supplement_1.pdf]

Figure 2-figure supplement 2

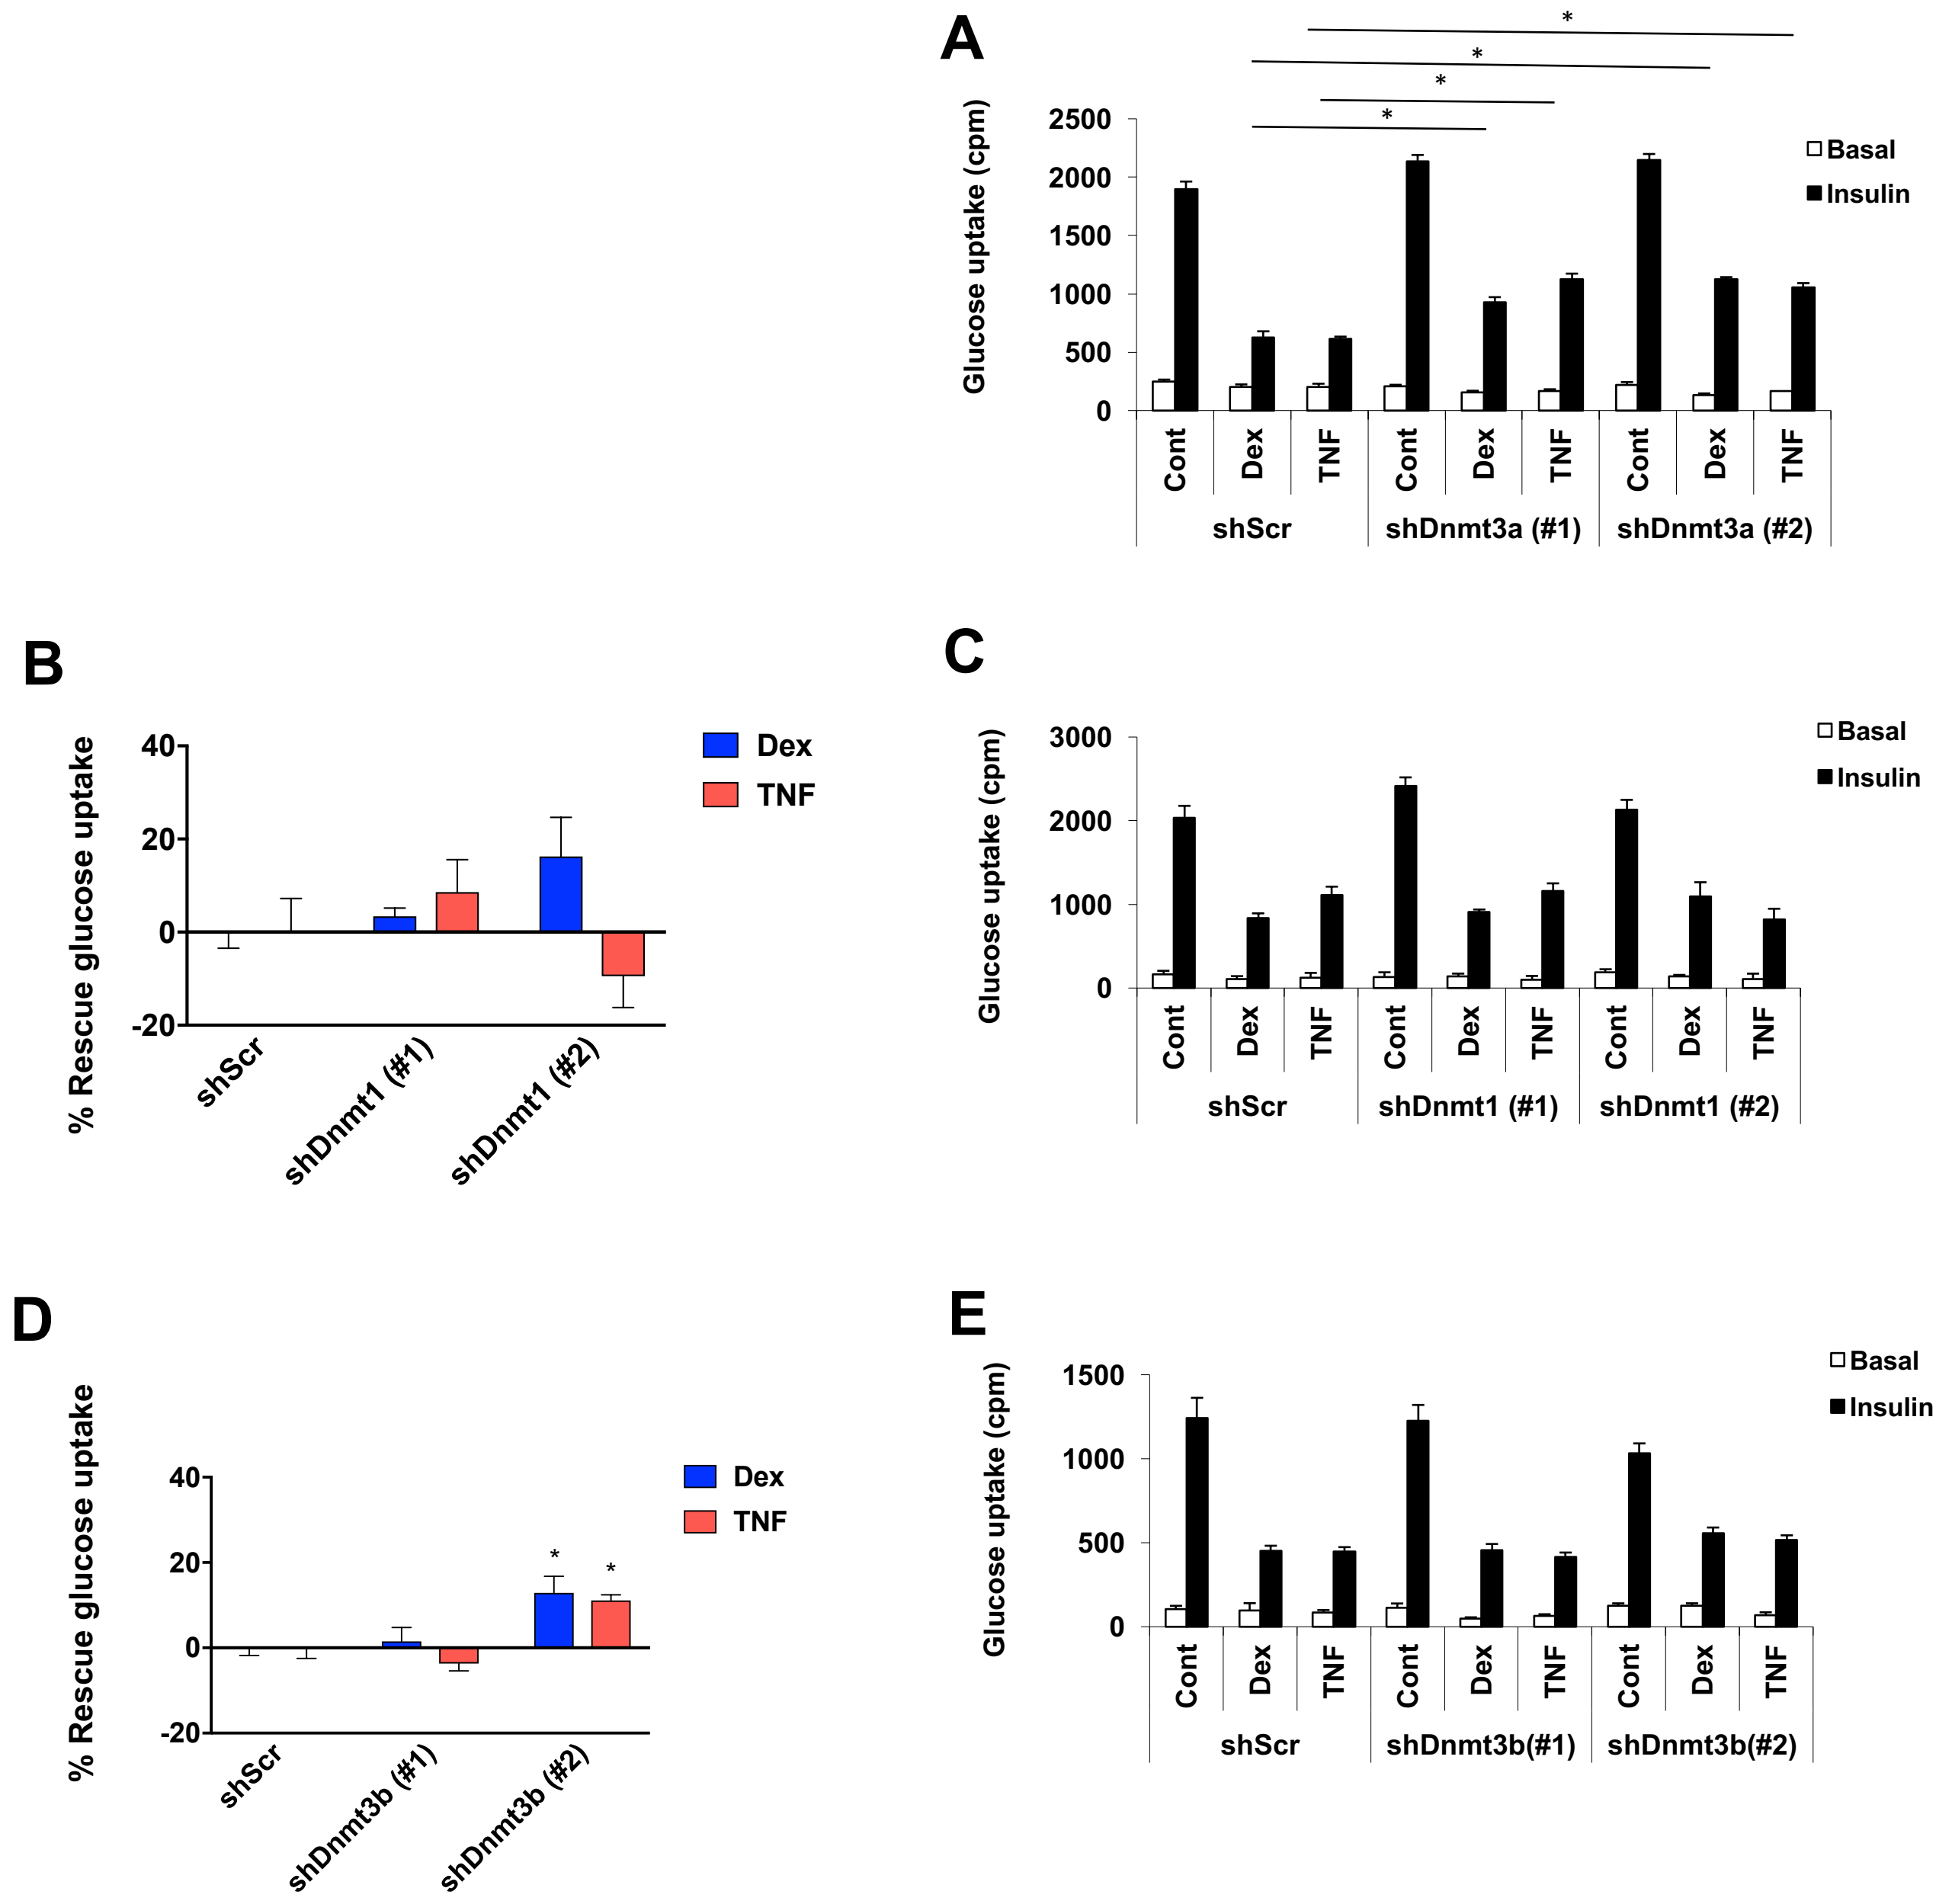

Supplement: supp [file elife_poa_e30766_Figure_2_figure_supplement_2.pdf › elife_poa_e30766_Figure_2_figure_supplement_2.pdf]

Figure 3-figure supplement

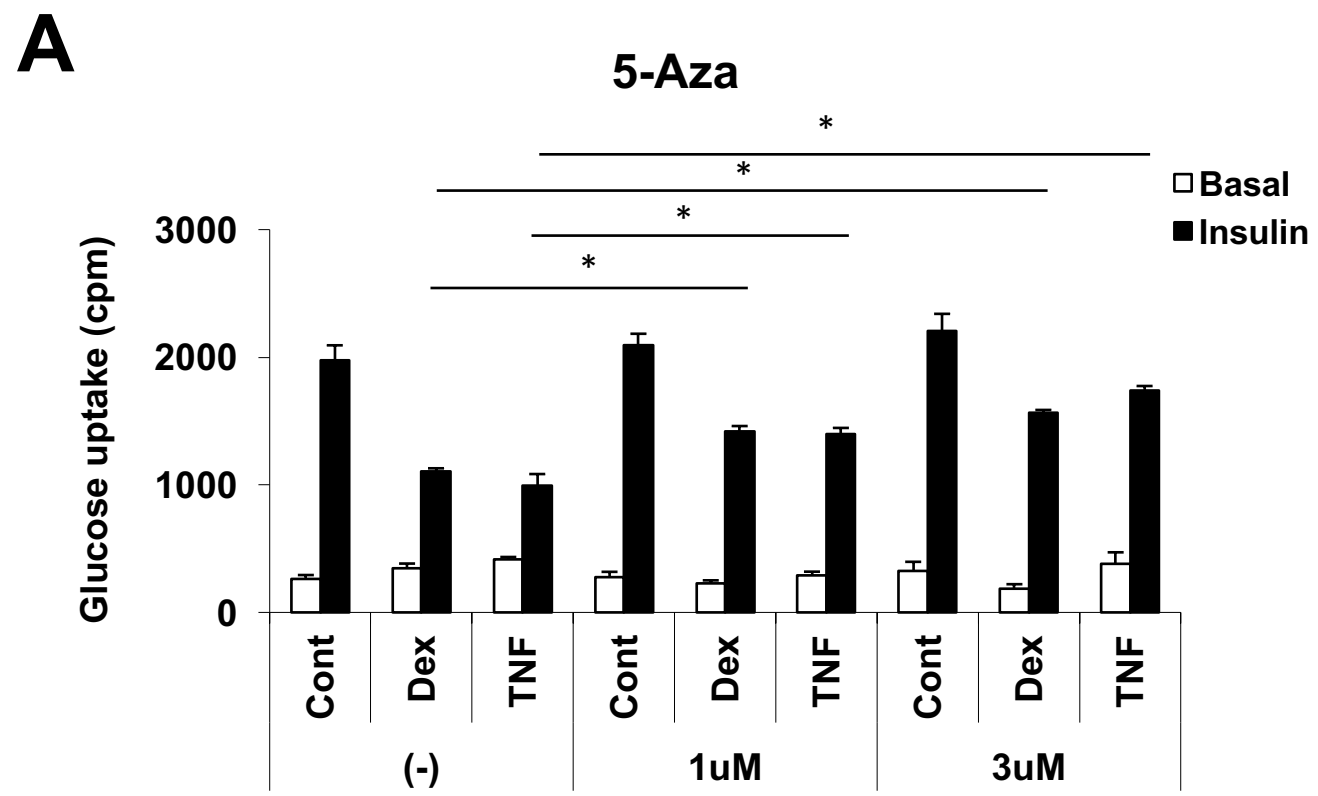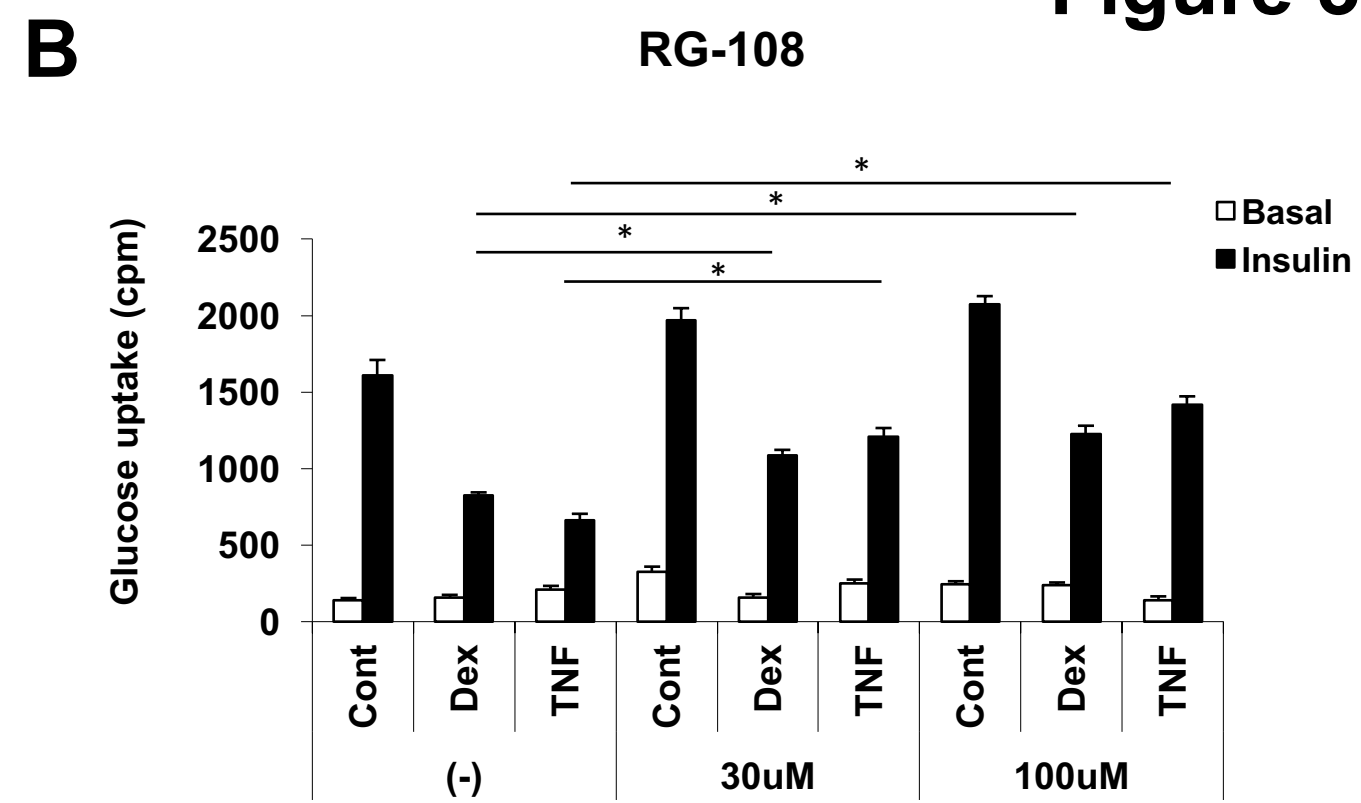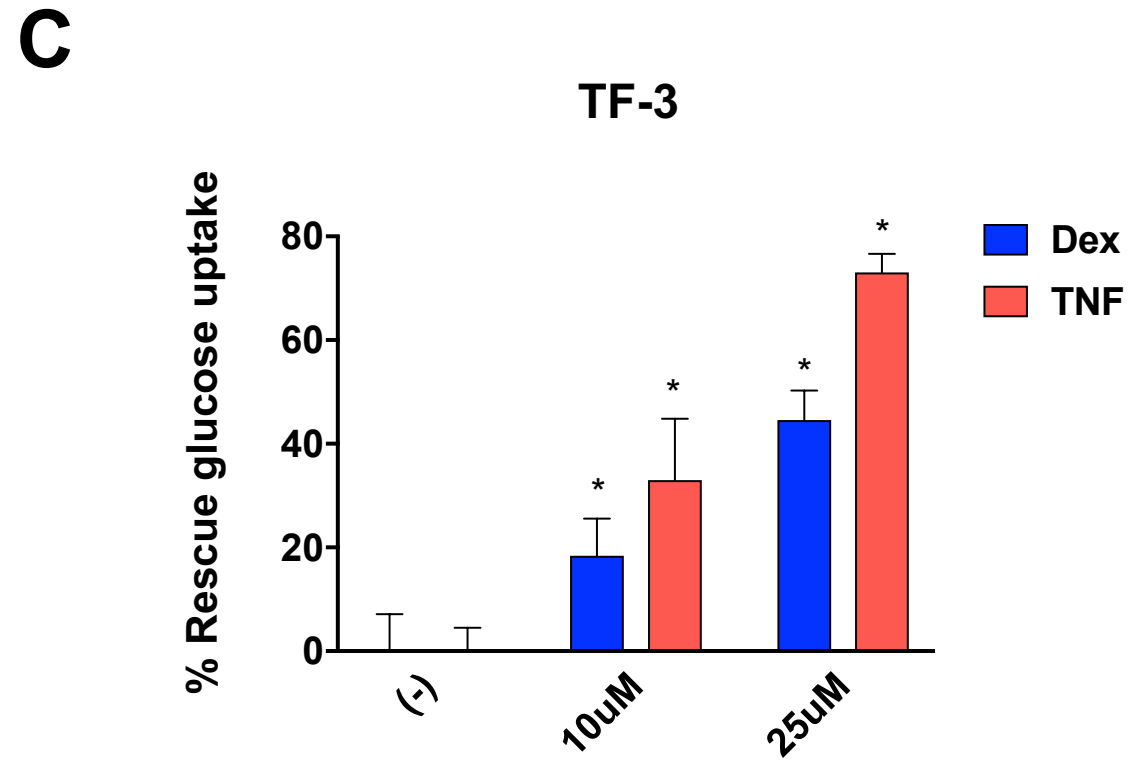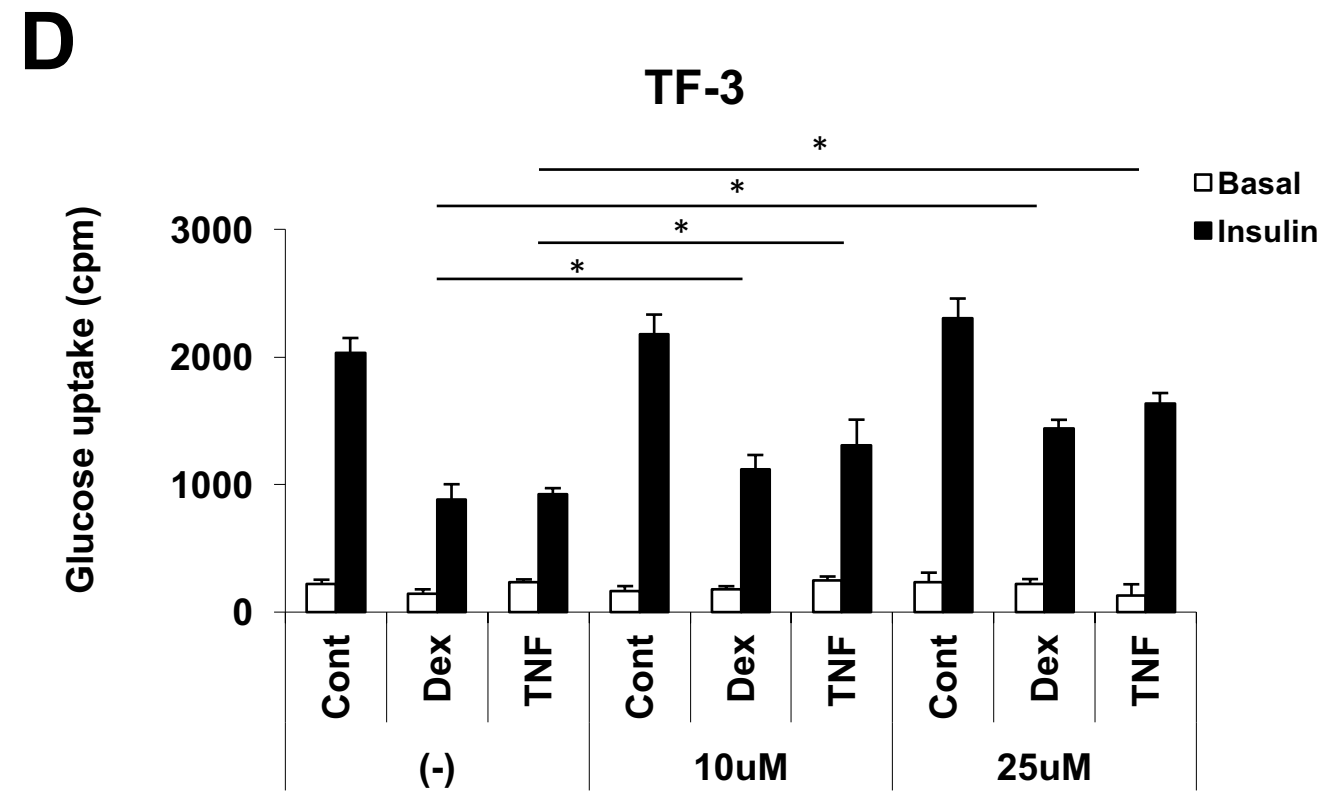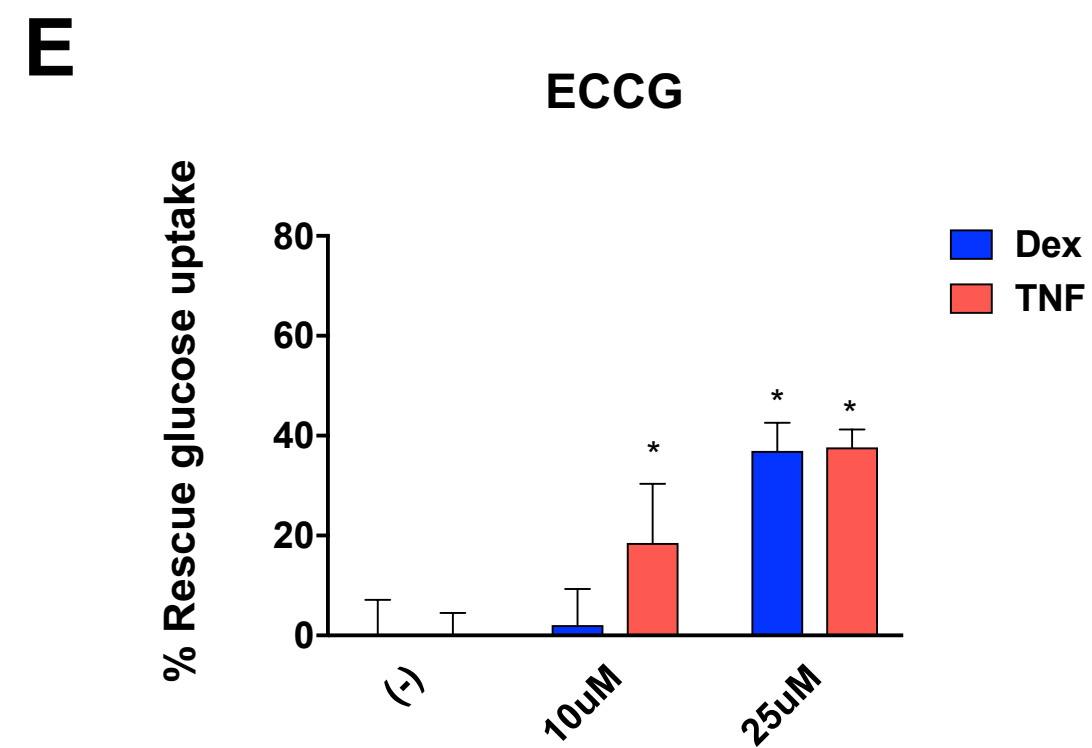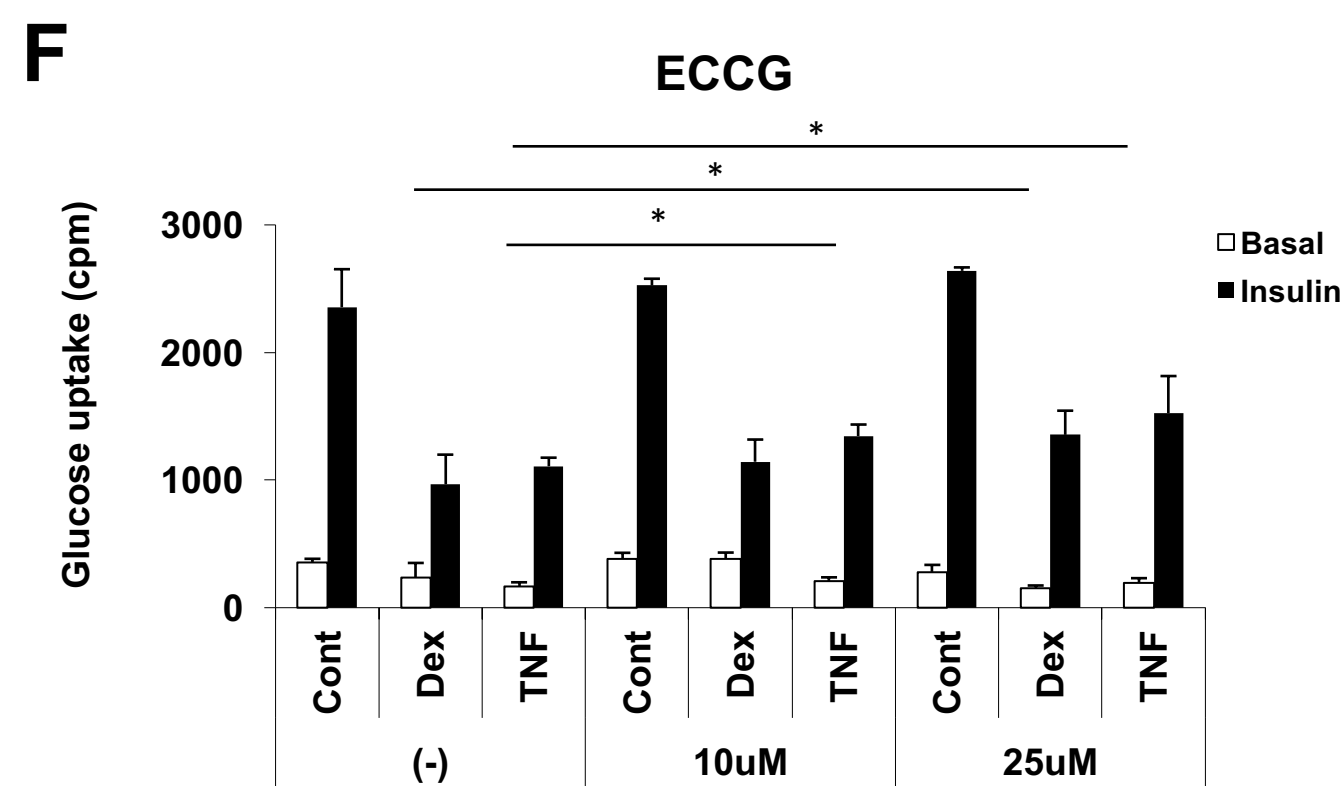

Supplement: supp [file elife_poa_e30766_Figure_3_figure_supplement_1.pdf › elife_poa_e30766_Figure_3_figure_supplement_1.pdf]

Figure 4-figure supplement 1

**A**

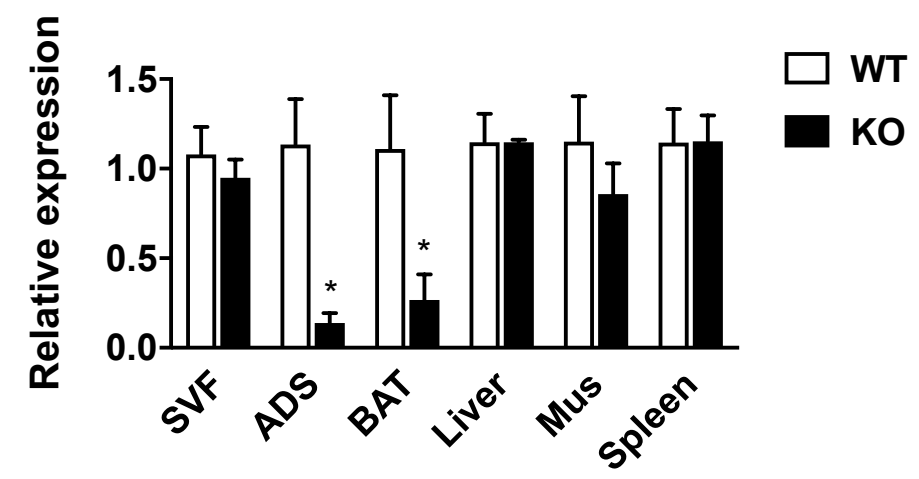

**B**

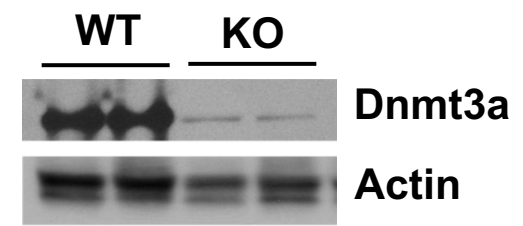

Supplement: supp [file elife_poa_e30766_Figure_4_figure_supplement_1.pdf › elife_poa_e30766_Figure_4_figure_supplement_1.pdf]

Figure 4-figure supplement 2

**A**

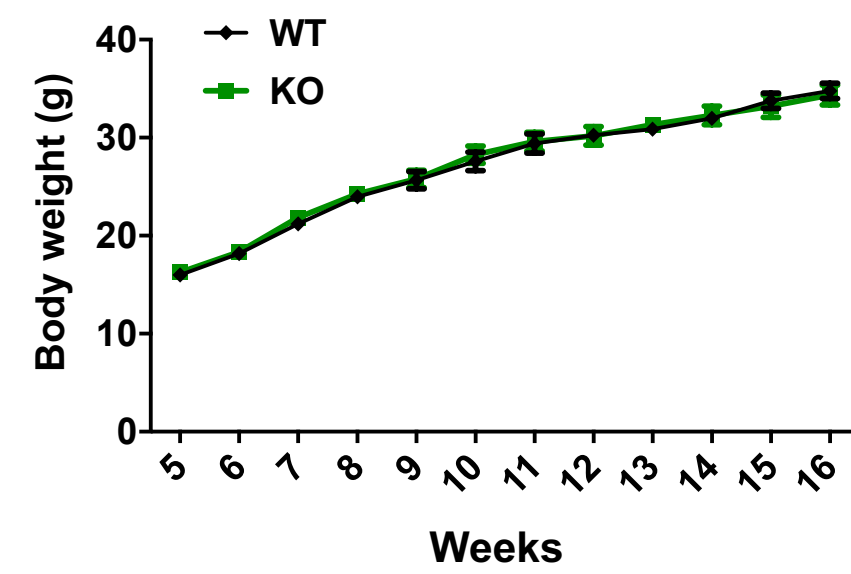

**B**

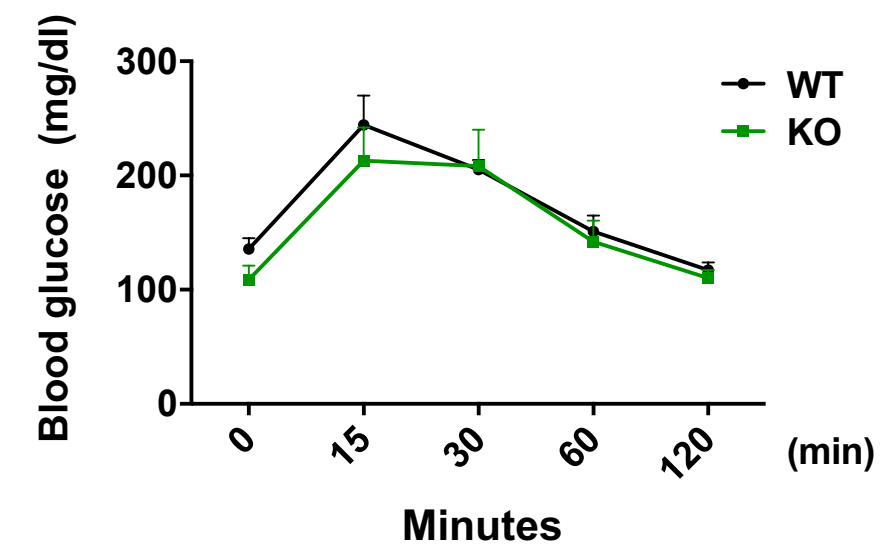

**C**

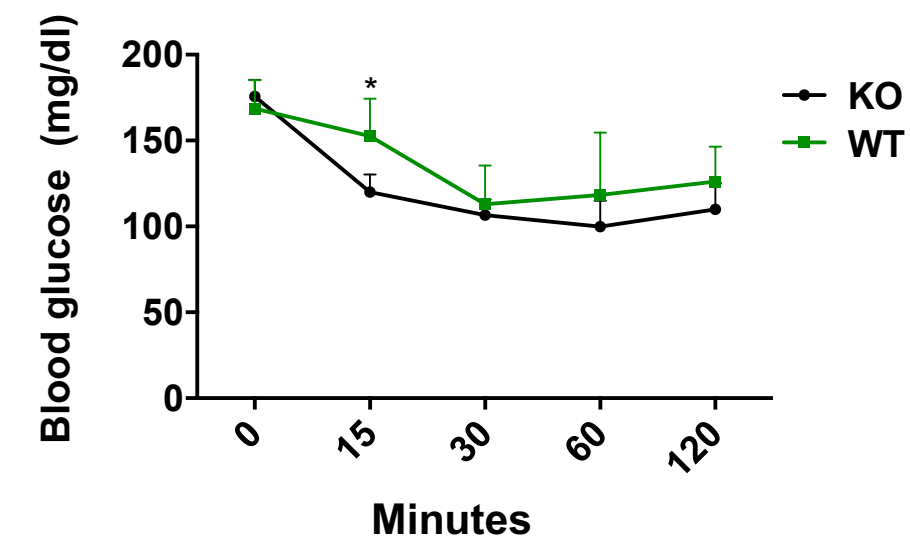

**D**

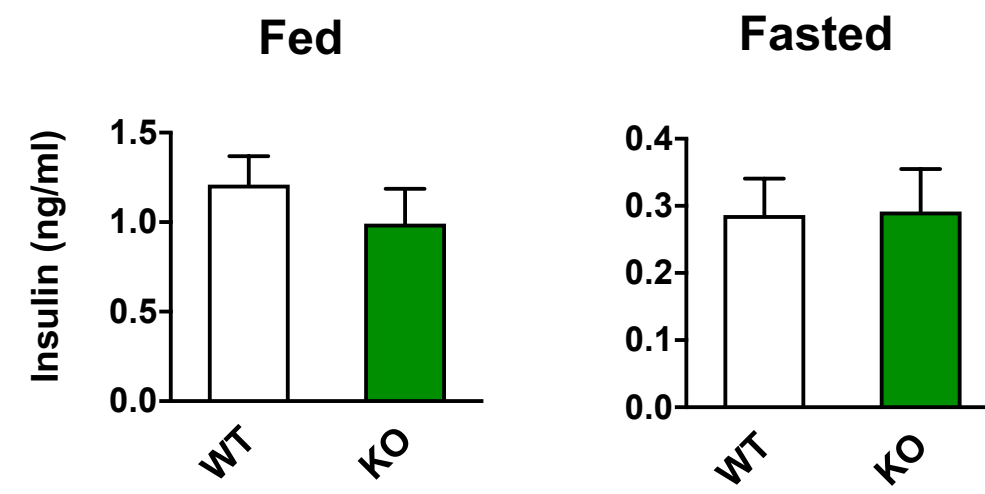

Supplement: supp [file elife_poa_e30766_Figure_4_figure_supplement_2.pdf › elife_poa_e30766_Figure_4_figure_supplement_2.pdf]

Figure 4-figure supplement 3

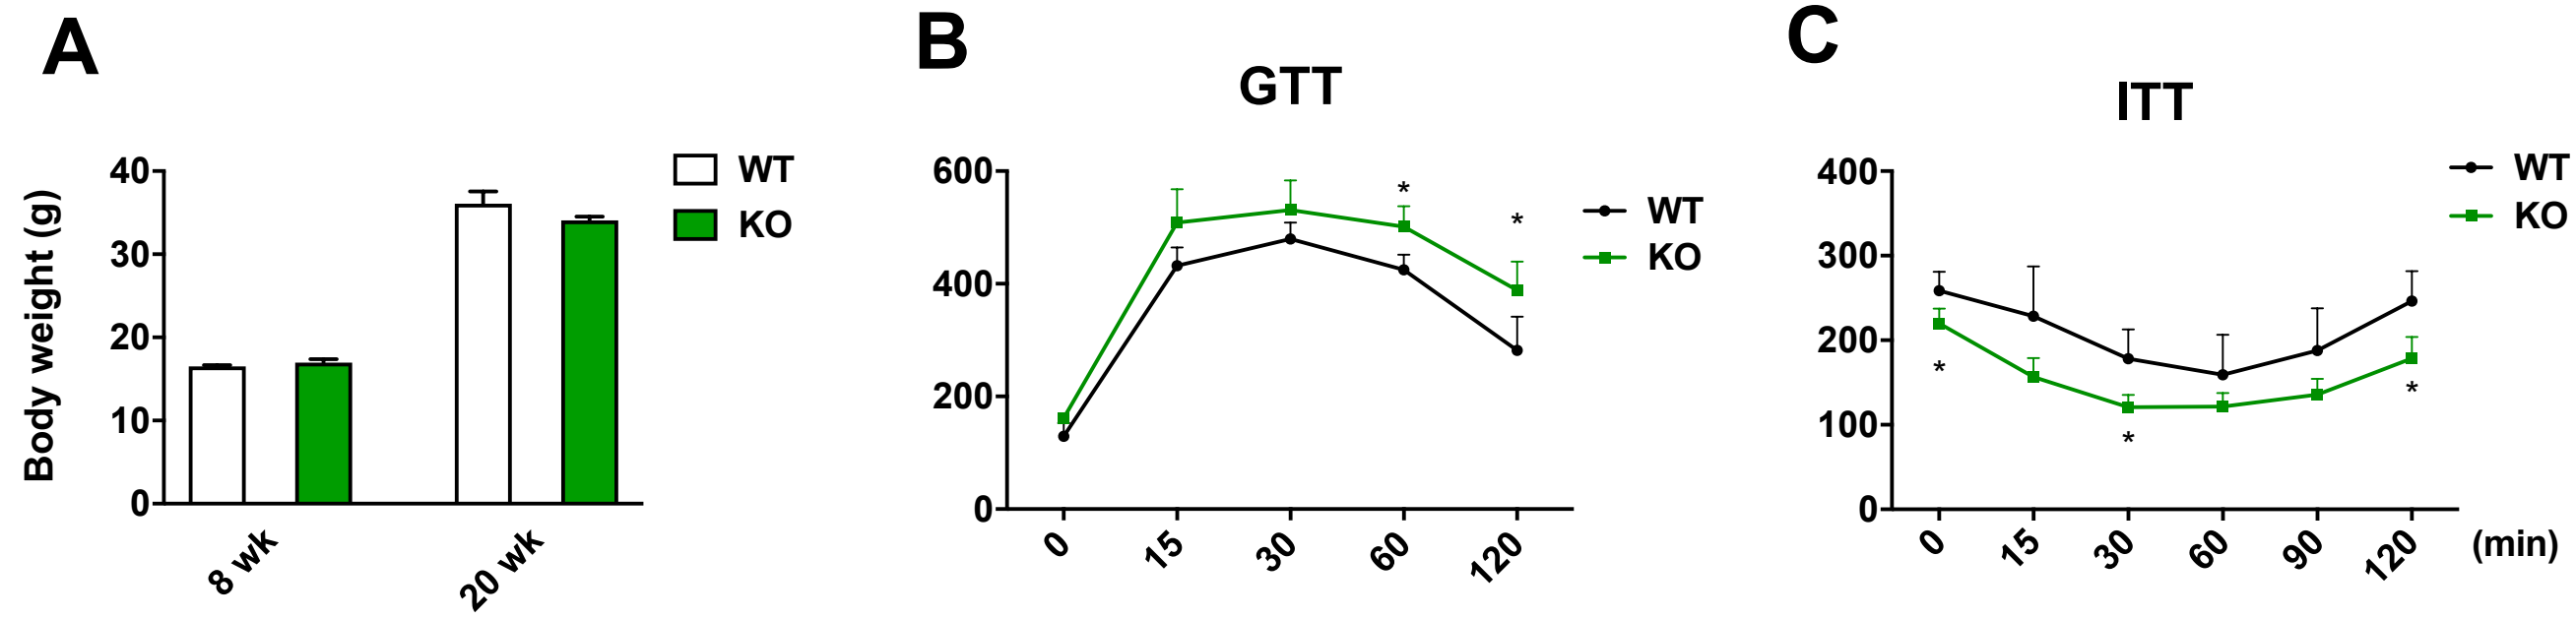

Supplement: supp [file elife_poa_e30766_Figure_4_figure_supplement_3.pdf › elife_poa_e30766_Figure_4_figure_supplement_3.pdf]

Figure 4-figure supplement 4

**A**

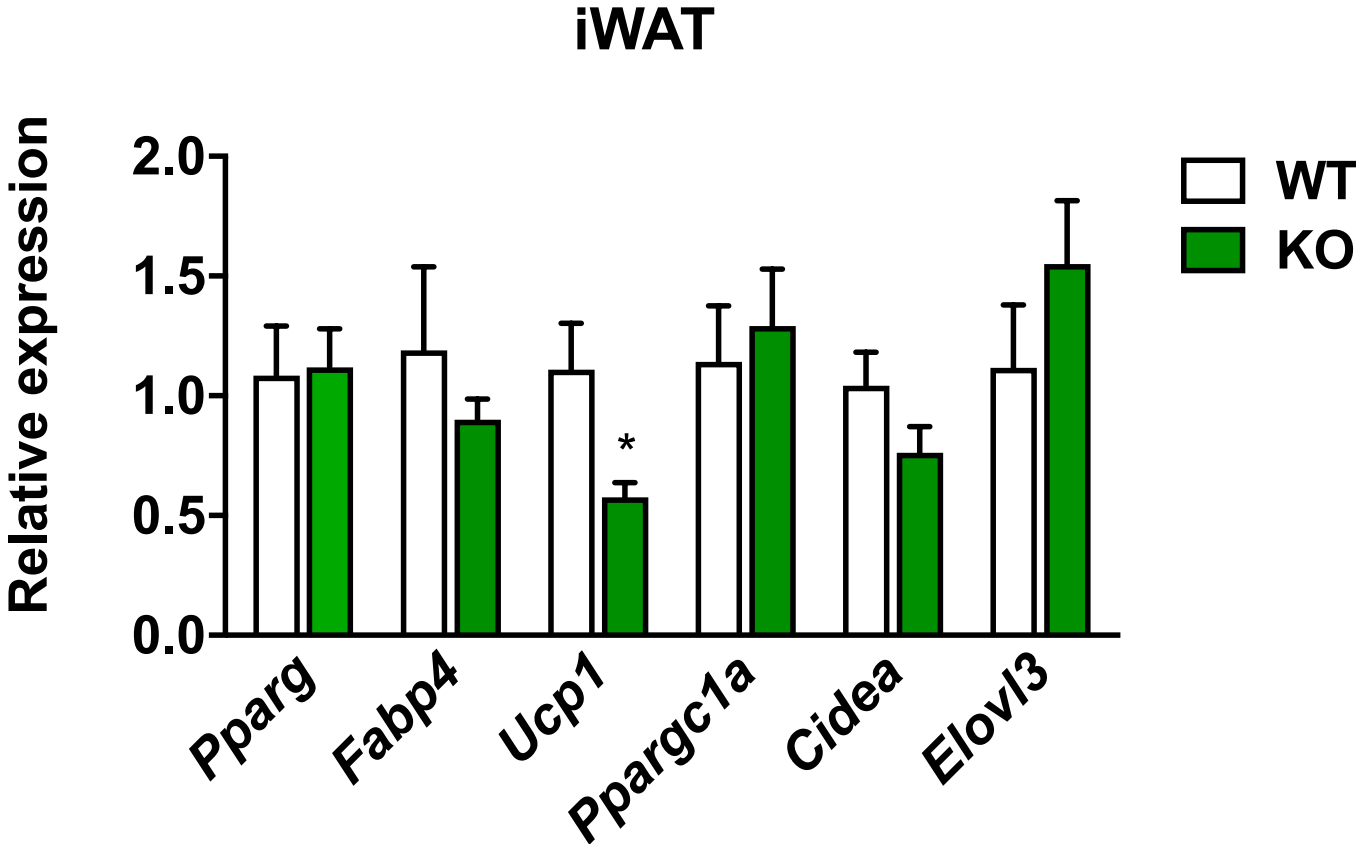

**B**

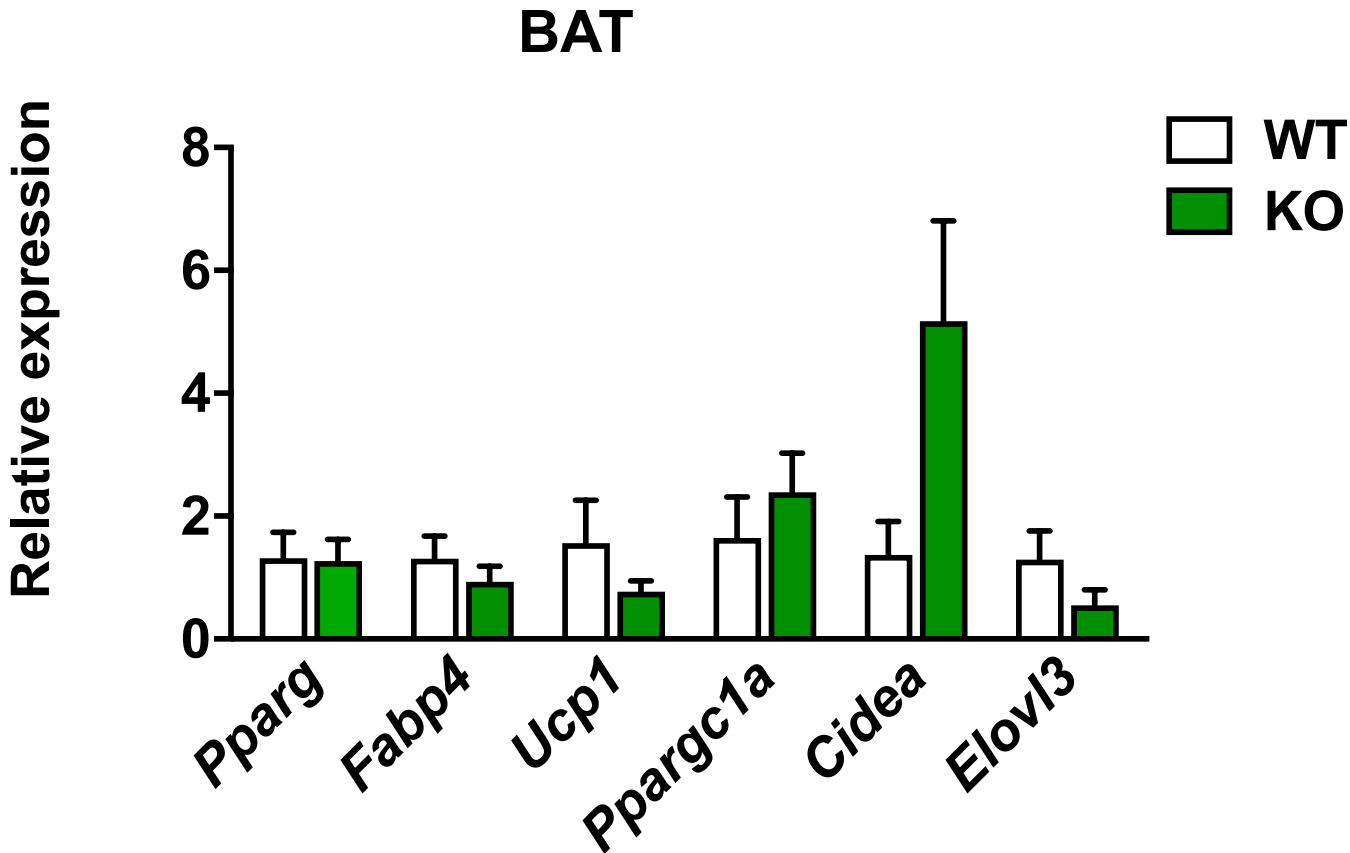

Supplement: supp [file elife_poa_e30766_Figure_4_figure_supplement_4.pdf › elife_poa_e30766_Figure_4_figure_supplement_4.pdf]

Figure 4-figure supplement 5

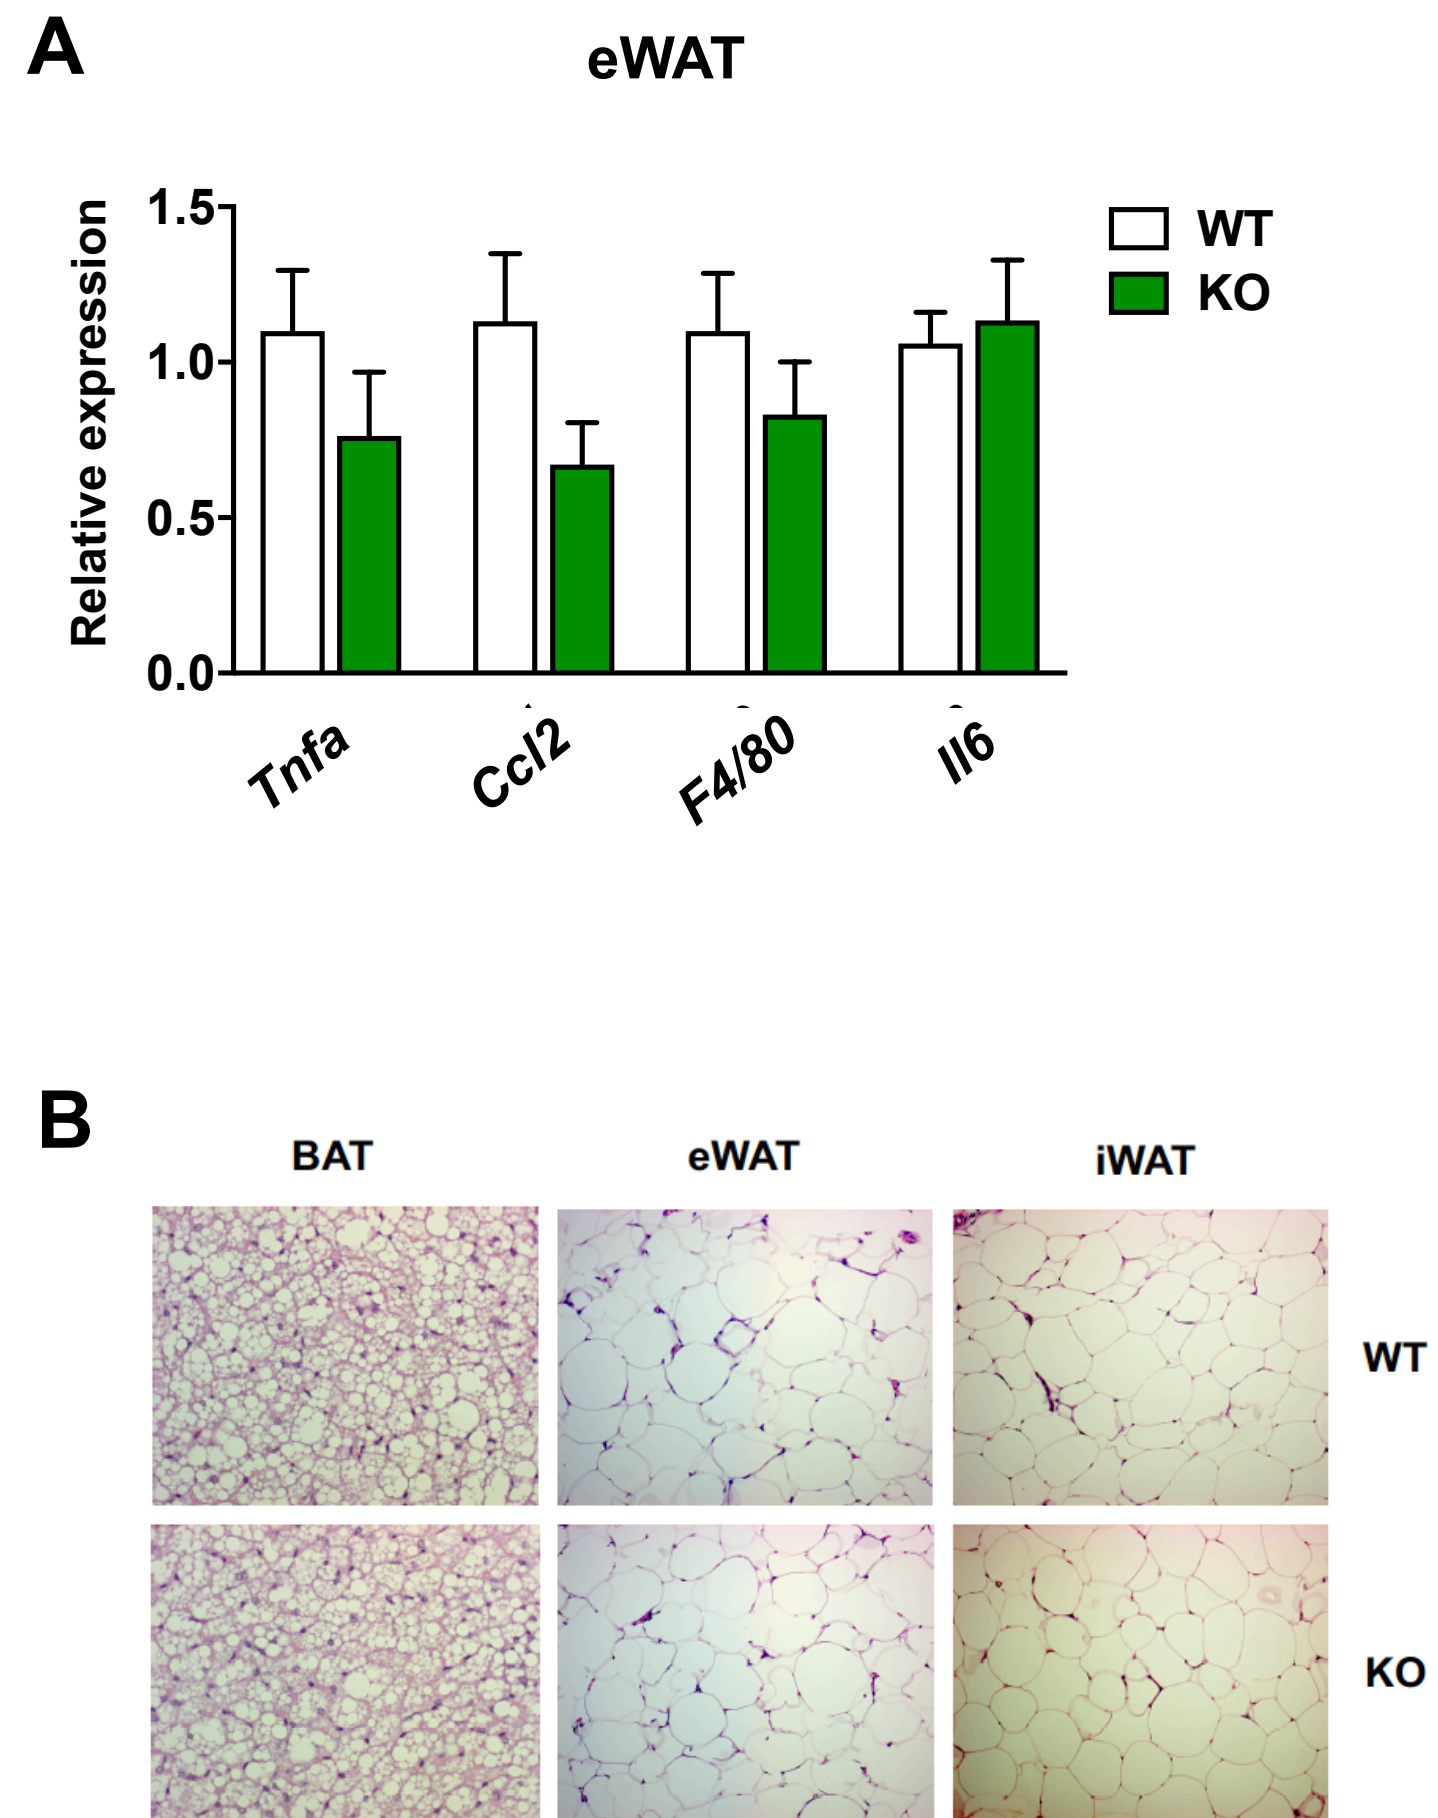

Supplement: supp [file elife_poa_e30766_Figure_4_figure_supplement_5.pdf › elife_poa_e30766_Figure_4_figure_supplement_5.pdf]

**A**

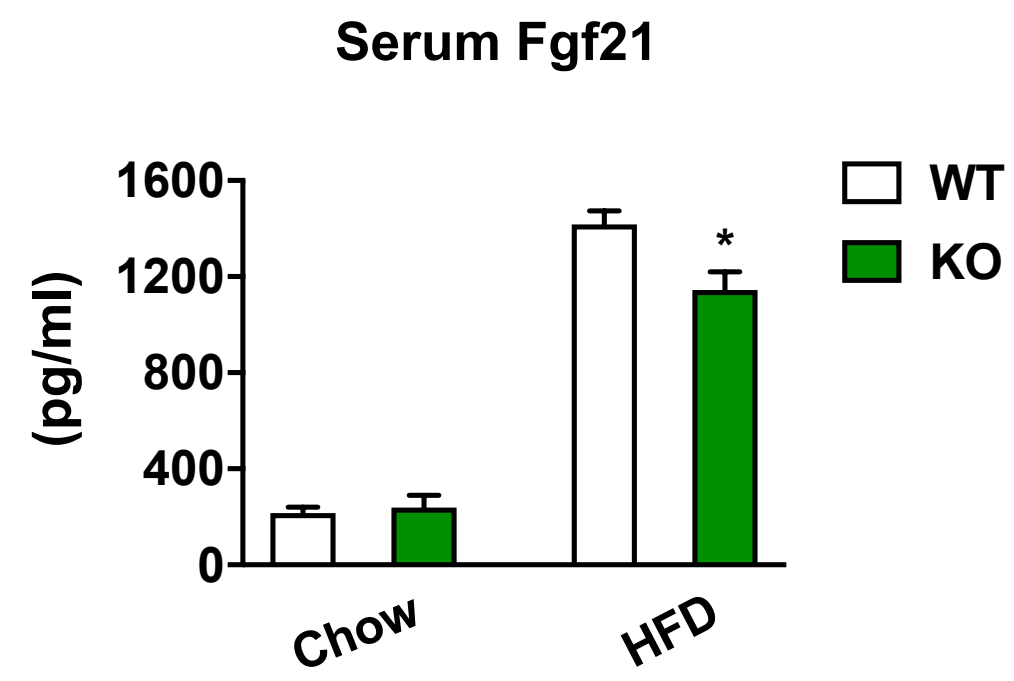

**Figure 5-figure supplement**

Supplement: supp [file elife_poa_e30766_Figure_5_figure_supplement_1.pdf › elife_poa_e30766_Figure_5_figure_supplement_1.pdf]
